# Supplementary material for: Synthesis of (1-silyl)allylboronates by KOtBu-catalyzed ring-opening gem-silylborylation of cyclopropenes
Source: Royal Society of Chemistry journal article supplement (doi:10.1039/d4cc01336k), 2024-01-01
Supplement: d4cc01336k1.pdf [file d4cc01336k1.pdf]

**Electronic Supplementary Information**  
**for**  
**Synthesis of (1-silyl)allylboronates by KO<sup>t</sup>Bu-catalyzed ring-opening *gem*-silylborylation of cyclopropenes**

Ikuya Fujii,<sup>†,‡</sup> Haruka Hirata,<sup>†</sup> Hirokazu Moniwa<sup>†</sup> and Ryo Shintani,<sup>\*,†,‡</sup>

<sup>†</sup>*Division of Chemistry, Department of Materials Engineering Science, Graduate School of Engineering Science, Osaka University, Toyonaka, Osaka 560-8531, Japan*

<sup>‡</sup>*Innovative Catalysis Science Division, Institute for Open and Transdisciplinary Research Initiatives (ICS-OTRI), Osaka University, Suita, Osaka 565-0871, Japan*

|                                                         |            |
|---------------------------------------------------------|------------|
| <b>I. General</b>                                       | <b>S2</b>  |
| <b>II. Synthesis of Substrates</b>                      | <b>S3</b>  |
| <b>III. Catalytic Reactions and Derivatization</b>      | <b>S6</b>  |
| <b>IV. X-ray Crystal Structure</b>                      | <b>S14</b> |
| <b>V. Theoretical Calculations</b>                      | <b>S16</b> |
| <b>VI. <sup>1</sup>H and <sup>13</sup>C NMR Spectra</b> | <b>S33</b> |
| <b>VII. References</b>                                  | <b>S73</b> |

## I. General

All reactions were carried out with standard Schlenk techniques under nitrogen unless otherwise noted. NMR spectra were recorded on JEOL JNM-ECS400, JEOL JNM-ECZL400S, or Agilent Unity-Inova500 spectrometer. High resolution mass spectra were recorded on JEOL JMS700 spectrometer. X-ray crystallographic analysis was performed by RIGAKU XTaLAB P200 with graphite-monochromated Mo-K $\alpha$  (0.71075 Å) radiation. Preparative GPC was performed with JAI LaboACE LC-5060 equipped with JAIGEL-2HR columns using CHCl<sub>3</sub> as an eluent. Reversed-phase chromatography was performed with JAI LaboACE LC-5060 equipped with Mightysil RP-18GPII columns using MeCN as an eluent. Computations were performed using workstation at Research Center for Computational Science, National Institutes of Natural Sciences, Okazaki, Japan.

THF (Kanto Chemical; dehydrated), Et<sub>2</sub>O (Wako Chemicals; dehydrated), CH<sub>2</sub>Cl<sub>2</sub> (Kanto Chemical; dehydrated), toluene (Wako Chemicals), DMSO (Kanto Chemical; dehydrated), H<sub>2</sub>O (Kishida Chemical), 4-bromoanisole (Wako Chemicals), 4-chloroacetophenone (TCI), CHBr<sub>3</sub> (Wako Chemicals), benzyltriethylammonium chloride (Wako Chemicals), (dimethylphenylsilyl)boronic acid pinacol ester (Wako Chemicals), 4-toluenesulfonic acid monohydrate (Wako Chemicals), TfOH (TCI), *n*BuLi (Kanto Chemical; 1.58 M solution in hexane), EtMgBr (Aldrich; 3.0 M solution in Et<sub>2</sub>O), KO*t*Bu (TCI or Nacalai Tesque), NaO*t*Bu (TCI), LiO*t*Bu (Aldrich), Ti(O*t*Pr)<sub>4</sub> (Wako Chemicals), NaOH (Wako Chemicals), and NaBO<sub>3</sub>•4H<sub>2</sub>O (Wako Chemicals) were used as received. **1a**,<sup>1</sup> **1b**,<sup>1</sup> **1d**,<sup>2</sup> **1e**,<sup>1</sup> **1i**,<sup>3</sup> **1j**,<sup>3</sup> **1k**,<sup>3</sup> **1l**,<sup>4</sup> **2b**,<sup>5</sup> **2c**,<sup>5</sup> and Cu(O*t*Bu)(IPr)<sup>6</sup> were synthesized following the literature procedures.

## II. Synthesis of Substrates

### Representative Procedures for Substrates:

#### 3-(4-Chlorophenyl)-3-(4-methoxyphenyl)cyclopropene (**1h**)

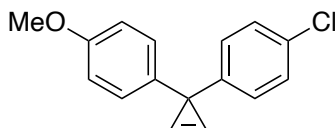

*n*BuLi (7.80 mL, 12.5 mmol; 1.58 M solution in hexane) was added over 12 min to a solution of 4-bromoanisole (1.56 mL, 12.5 mmol) in THF (30 mL) at  $-78\text{ }^{\circ}\text{C}$ , and the mixture was stirred for 30 min at  $-78\text{ }^{\circ}\text{C}$ . 4-Chloroacetophenone (1.95 mL, 15.0 mmol) was then added to it, and the resulting mixture was stirred for 2 h at  $-78\text{ }^{\circ}\text{C}$  and gradually warmed to room temperature over 1.5 h. The reaction was quenched with  $\text{H}_2\text{O}$  and this was extracted with  $\text{CH}_2\text{Cl}_2$ . The organic layer was washed with saturated NaCl<sub>aq</sub>, dried over  $\text{MgSO}_4$ , filtered, and concentrated under vacuum. The residue was dissolved in toluene (30 mL) and 4-toluenesulfonic acid monohydrate (123 mg, 0.646 mmol) was added to it. The mixture was stirred for 2.5 h at  $70\text{ }^{\circ}\text{C}$ , and the reaction was quenched with  $\text{H}_2\text{O}$  and saturated  $\text{NH}_4\text{Cl}_{\text{aq}}$  at room temperature. This was extracted with  $\text{CH}_2\text{Cl}_2$ , and the organic layer was washed with saturated NaCl<sub>aq</sub>, dried over  $\text{K}_2\text{CO}_3$ , filtered and concentrated under vacuum. The residue was chromatographed on silica gel with hexane/ $\text{CH}_2\text{Cl}_2$  = 1/1 to afford 1-(4-chlorophenyl)-1-(4-methoxyphenyl)ethylene as a white solid (2.62 g, 10.7 mmol; 86 % yield).

$^1\text{H}$  NMR ( $\text{CDCl}_3$ ):  $\delta$  7.33-7.26 (m, 4H), 7.24 (d,  $^3J_{\text{HH}} = 8.7\text{ Hz}$ , 2H), 6.87 (d,  $^3J_{\text{HH}} = 8.7\text{ Hz}$ , 2H), 5.40 (d,  $^2J_{\text{HH}} = 0.9\text{ Hz}$ , 1H), 5.34 (d,  $^2J_{\text{HH}} = 0.9\text{ Hz}$ , 1H), 3.83 (s, 3H).

A solution of NaOH (17.1 g, 428 mmol) in  $\text{H}_2\text{O}$  (17 mL) was added dropwise over 1 h to a solution of 1-(4-chlorophenyl)-1-(4-methoxyphenyl)ethylene (2.62 g, 10.7 mmol), benzyltriethylammonium chloride (424 mg, 1.86 mmol), and  $\text{CHBr}_3$  (1.42 mL, 14.6 mmol) in  $\text{CH}_2\text{Cl}_2$  (10 mL). The mixture was stirred for 21 h at  $40\text{ }^{\circ}\text{C}$ , and the reaction was quenched with  $\text{H}_2\text{O}$  and saturated  $\text{NH}_4\text{Cl}_{\text{aq}}$  at room temperature. This was extracted with  $\text{CH}_2\text{Cl}_2$ , and the organic layer was washed with saturated NaCl<sub>aq</sub>, dried over  $\text{MgSO}_4$ , passed through a pad of silica gel with EtOAc, and concentrated under vacuum. The residue was further passed through a pad of silica gel with  $\text{CH}_2\text{Cl}_2$  and then with EtOAc to afford 1,1-dibromo-2-(4-chlorophenyl)-2-(4-methoxyphenyl)cyclopropane as a brown solid (4.10 g, 9.85 mmol; 92% yield).

$^1\text{H}$  NMR ( $\text{CDCl}_3$ ):  $\delta$  7.41 (d,  $^3J_{\text{HH}} = 8.2\text{ Hz}$ , 2H), 7.38 (d,  $^3J_{\text{HH}} = 9.2\text{ Hz}$ , 2H), 7.28 (d,  $^3J_{\text{HH}} = 8.7\text{ Hz}$ , 2H), 6.84 (d,  $^3J_{\text{HH}} = 8.7\text{ Hz}$ , 2H), 3.77 (s, 3H), 2.44 (d,  $^2J_{\text{HH}} = 7.3\text{ Hz}$ , 1H), 2.40 (d,  $^2J_{\text{HH}} = 7.8\text{ Hz}$ , 1H).

$\text{Ti}(\text{O}i\text{Pr})_4$  (146  $\mu\text{L}$ , 0.493 mmol) was added to a solution of 1,1-dibromo-2-(4-chlorophenyl)-2-(4-methoxyphenyl)cyclopropane (4.10 g, 9.85 mmol) in THF (15 mL) and  $\text{Et}_2\text{O}$  (22 mL) at room temperature.  $\text{EtMgBr}$  (3.93 mL, 11.8 mmol; 3.0 M solution in  $\text{Et}_2\text{O}$ ) was added dropwise to it over 2 h and the mixture was stirred for 2 h at room temperature. The reaction was slowly quenched with  $\text{H}_2\text{O}$  and 1 M HCl<sub>aq</sub> at  $0\text{ }^{\circ}\text{C}$ . This was extracted with  $\text{Et}_2\text{O}$ , and the organic layer was washed with saturated

NaCl<sub>aq</sub>, dried over MgSO<sub>4</sub>, filtered, and concentrated under vacuum. The residue was chromatographed on silica gel with hexane/CH<sub>2</sub>Cl<sub>2</sub> = 3/1 to afford 1-bromo-2-(4-chlorophenyl)-2-(4-methoxyphenyl)cyclopropane as a colorless oil (2.58 g, 7.63 mmol; 77 % yield, dr = 56/44).

<sup>1</sup>H NMR (CDCl<sub>3</sub>): δ 7.35-7.29 (m, 2.24H), 7.28 (d, <sup>3</sup>J<sub>HH</sub> = 8.7 Hz, 0.88H), 7.22 (d, <sup>3</sup>J<sub>HH</sub> = 8.7 Hz, 0.88H), 7.17-7.10 (m, 2H), 6.89 (d, <sup>3</sup>J<sub>HH</sub> = 8.7 Hz, 0.88H), 6.80 (d, <sup>3</sup>J<sub>HH</sub> = 8.7 Hz, 1.12H), 3.81 (s, 1.32H), 3.76 (s, 1.68H), 3.67-3.58 (m, 1H), 1.88-1.70 (m, 2H).

KOtBu (1.11 g, 9.92 mmol) was added portionwise to a solution of 1-bromo-2-(4-chlorophenyl)-2-(4-methoxyphenyl)cyclopropane (2.58 g, 7.63 mmol) in DMSO (18 mL) at room temperature. The mixture was stirred for 2 h at room temperature and the reaction was slowly quenched with H<sub>2</sub>O at 15 °C. This was extracted with Et<sub>2</sub>O/hexane, and the organic layer was washed with saturated NaCl<sub>aq</sub>, dried over MgSO<sub>4</sub>, filtered, and concentrated under vacuum. The residue was chromatographed on silica gel with hexane/CH<sub>2</sub>Cl<sub>2</sub> = 2/1 to afford compound **1h** as a pale yellow solid (1.66 g, 6.47 mmol; 85% yield).

<sup>1</sup>H NMR (CDCl<sub>3</sub>): δ 7.47 (s, 2H), 7.23 (d, <sup>3</sup>J<sub>HH</sub> = 8.2 Hz, 2H), 7.09 (d, <sup>3</sup>J<sub>HH</sub> = 8.7 Hz, 2H), 7.07 (d, <sup>3</sup>J<sub>HH</sub> = 8.7 Hz, 2H), 6.83 (d, <sup>3</sup>J<sub>HH</sub> = 8.7 Hz, 2H), 3.80 (s, 3H). <sup>13</sup>C{<sup>1</sup>H} NMR (CDCl<sub>3</sub>): δ 158.0, 146.2, 138.7, 131.4, 129.5, 129.1, 128.2, 113.7, 113.6, 55.4, 30.9. HRMS (FAB) calcd for C<sub>16</sub>H<sub>13</sub>ClO (M<sup>+</sup>) 256.0649, found 256.0657.

#### Analytical Data for Other substrate:

##### 3,3-Di(4-phenylphenyl)cyclopropene (1c)

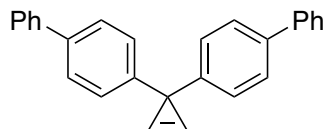

<sup>1</sup>H NMR (CDCl<sub>3</sub>): δ 7.63-7.57 (m, 4H), 7.56 (s, 2H), 7.54 (d, <sup>3</sup>J<sub>HH</sub> = 8.2 Hz, 4H), 7.43 (t, <sup>3</sup>J<sub>HH</sub> = 7.5 Hz, 4H), 7.36-7.30 (m, 2H), 7.30 (d, <sup>3</sup>J<sub>HH</sub> = 8.7 Hz, 4H). <sup>13</sup>C{<sup>1</sup>H} NMR (CDCl<sub>3</sub>): δ 146.2, 141.1, 138.8, 128.8, 128.6, 127.2, 127.1, 127.0, 113.3, 31.5. HRMS (FAB) calcd for C<sub>27</sub>H<sub>20</sub> (M<sup>+</sup>) 344.1560, found 344.1562.

##### 3,3-Di(3-methoxyphenyl)cyclopropene (1f)

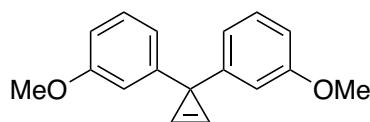

<sup>1</sup>H NMR (CDCl<sub>3</sub>): δ 7.45 (s, 2H), 7.25-7.15 (m, 2H), 6.83-6.68 (m, 6H), 3.77 (s, 6H). <sup>13</sup>C{<sup>1</sup>H} NMR (CDCl<sub>3</sub>): δ 159.6, 148.8, 129.2, 120.7, 114.0, 113.0, 111.2, 55.2, 31.9. HRMS (FAB) calcd for C<sub>17</sub>H<sub>16</sub>O<sub>2</sub> (M<sup>+</sup>) 252.1145, found 252.1144.

**3,3-Di(2-naphthyl)cyclopropene (1g)**

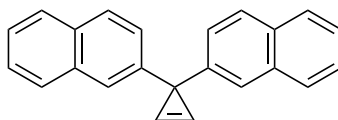

$^1\text{H}$  NMR ( $\text{CDCl}_3$ ):  $\delta$  7.87-7.81 (m, 2H), 7.79 (d,  $^3J_{\text{HH}} = 8.7$  Hz, 2H), 7.78-7.72 (m, 2H), 7.68 (s, 2H), 7.66 (s, 2H), 7.49-7.41 (m, 4H), 7.39 (dd,  $^3J_{\text{HH}} = 8.7$  Hz and  $^4J_{\text{HH}} = 1.8$  Hz, 2H).  $^{13}\text{C}\{^1\text{H}\}$  NMR ( $\text{CDCl}_3$ ):  $\delta$  144.7, 133.6, 132.1, 127.8, 127.7, 126.81, 126.79, 126.1, 125.5, 113.8, 32.4. HRMS (FAB) calcd for  $\text{C}_{23}\text{H}_{16}$  ( $\text{M}^+$ ) 292.1247, found 292.1247.

### III. Catalytic Reactions and Derivatization

#### General Procedure for Table 2.

KOtBu (3.4 mg, 30  $\mu$ mol) was dissolved in THF (0.5 mL) at 40 °C. Silylboronate **2a** (98.1  $\mu$ L, 0.360 mmol), cyclopropene **1** (0.300 mmol), and THF (1.0 mL) were added to it, and the resulting mixture was stirred for 20 h at 40 °C. This was passed through a pad of silica gel with EtOAc, and the solvent was removed under vacuum. The residue was chromatographed on silica gel and further purified by GPC with CHCl<sub>3</sub> to afford compound **3** (or **5**).

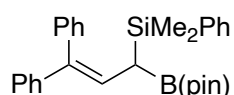

**Compound 3aa.** Hexane/EtOAc = 10/1 was used for silica gel chromatography. Pale yellow oil (92.3 mg, 0.216 mmol; 72% yield).

<sup>1</sup>H NMR (CDCl<sub>3</sub>):  $\delta$  7.46-7.40 (m, 2H), 7.35-7.07 (m, 11H), 6.93-6.87 (m, 2H), 6.22 (d, <sup>3</sup>J<sub>HH</sub> = 12.4 Hz, 1H), 2.10 (d, <sup>3</sup>J<sub>HH</sub> = 12.4 Hz, 1H), 1.20 (s, 6H), 1.17 (s, 6H), 0.34 (s, 3H), 0.32 (s, 3H). <sup>13</sup>C{<sup>1</sup>H} NMR (CDCl<sub>3</sub>):  $\delta$  143.7, 140.4, 138.5, 138.0, 134.1, 130.4, 129.1, 128.3, 128.0, 127.7, 127.2, 127.1, 126.5, 126.2, 83.1, 25.1, 24.9, 20.8, -2.5, -2.8. HRMS (FAB) calcd for C<sub>29</sub>H<sub>35</sub>BO<sub>2</sub>Si (M<sup>+</sup>) 454.2494, found 454.2498.

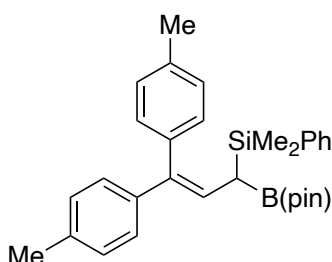

**Compound 3ba.** Hexane/EtOAc = 30/1 was used for silica gel chromatography. White solid (84.8 mg, 0.175 mmol; 58% yield).

<sup>1</sup>H NMR (CDCl<sub>3</sub>):  $\delta$  7.46-7.41 (m, 2H), 7.34-7.26 (m, 3H), 7.07 (d, <sup>3</sup>J<sub>HH</sub> = 7.3 Hz, 2H), 7.00 (s, 4H), 6.80 (d, <sup>3</sup>J<sub>HH</sub> = 7.8 Hz, 2H), 6.15 (d, <sup>3</sup>J<sub>HH</sub> = 12.4 Hz, 1H), 2.35 (s, 3H), 2.29 (s, 3H), 2.08 (d, <sup>3</sup>J<sub>HH</sub> = 12.8 Hz, 1H), 1.18 (s, 6H), 1.15 (s, 6H), 0.33 (s, 3H), 0.31 (s, 3H). <sup>13</sup>C{<sup>1</sup>H} NMR (CDCl<sub>3</sub>):  $\delta$  141.0, 138.3, 138.2, 137.6, 135.8, 135.7, 134.1, 130.2, 129.01, 128.98, 128.7, 127.6, 127.0, 126.0, 83.1, 25.0, 24.9, 21.4, 21.2, 20.5, -2.5, -2.7. HRMS (FAB) calcd for C<sub>31</sub>H<sub>39</sub>BO<sub>2</sub>Si (M<sup>+</sup>) 482.2807, found 482.2819.

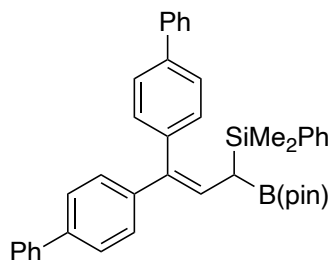

**Compound 3ca.** Hexane/CH<sub>2</sub>Cl<sub>2</sub> = 3/1 was used for silica gel chromatography. Yellow oil (109 mg, 0.179 mmol; 60% yield).

<sup>1</sup>H NMR (CDCl<sub>3</sub>): δ 7.67-7.62 (m, 2H), 7.59-7.54 (m, 2H), 7.52 (d, <sup>3</sup>J<sub>HH</sub> = 8.2 Hz, 2H), 7.49-7.38 (m, 8H), 7.38-7.26 (m, 5H), 7.21 (d, <sup>3</sup>J<sub>HH</sub> = 8.2 Hz, 2H), 6.99 (d, <sup>3</sup>J<sub>HH</sub> = 8.2 Hz, 2H), 6.33 (d, <sup>3</sup>J<sub>HH</sub> = 12.8 Hz, 1H), 2.20 (d, <sup>3</sup>J<sub>HH</sub> = 12.4 Hz, 1H), 1.22 (s, 6H), 1.19 (s, 6H), 0.39 (s, 3H), 0.35 (s, 3H). <sup>13</sup>C{<sup>1</sup>H} NMR (CDCl<sub>3</sub>): δ 142.6, 141.2, 141.1, 139.4, 139.2, 139.1, 138.0, 137.7, 134.1, 130.8, 129.1, 128.9, 128.8, 127.7, 127.5, 127.2, 127.1, 127.0, 126.8, 83.2, 25.1, 25.0, 21.1, -2.4, -2.8. HRMS (FAB) calcd for C<sub>41</sub>H<sub>43</sub>BO<sub>2</sub>Si (M<sup>+</sup>) 606.3120, found 606.3130.

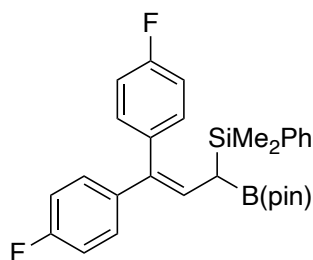

**Compound 3da.** Hexane/EtOAc = 30/1 was used for silica gel chromatography. White solid (104 mg, 0.213 mmol; 71% yield).

<sup>1</sup>H NMR (CDCl<sub>3</sub>): δ 7.44-7.37 (m, 2H), 7.36-7.26 (m, 3H), 7.00 (dd, <sup>3</sup>J<sub>HH</sub> = 8.7 Hz and <sup>4</sup>J<sub>HF</sub> = 5.5 Hz, 2H), 6.94 (t, <sup>3</sup>J = 8.7 Hz, 2H), 6.88 (t, <sup>3</sup>J = 8.7 Hz, 2H), 6.77 (dd, <sup>3</sup>J<sub>HH</sub> = 8.7 Hz and <sup>4</sup>J<sub>HF</sub> = 5.5 Hz, 2H), 6.13 (d, <sup>3</sup>J<sub>HH</sub> = 12.4 Hz, 1H), 2.02 (d, <sup>3</sup>J<sub>HH</sub> = 12.8 Hz, 1H), 1.21 (s, 6H), 1.19 (s, 6H), 0.36 (s, 3H), 0.32 (s, 3H). <sup>13</sup>C{<sup>1</sup>H} NMR (CDCl<sub>3</sub>): δ 161.8 (d, <sup>1</sup>J<sub>CF</sub> = 245 Hz), 161.7 (d, <sup>1</sup>J<sub>CF</sub> = 245 Hz), 139.7, 137.9, 136.5, 136.1, 134.1, 131.8 (d, <sup>3</sup>J<sub>CF</sub> = 7.7 Hz), 129.2, 128.5 (d, <sup>3</sup>J<sub>CF</sub> = 7.7 Hz), 127.7, 127.4, 115.3 (d, <sup>2</sup>J<sub>CF</sub> = 21.1 Hz), 114.9 (d, <sup>2</sup>J<sub>CF</sub> = 22.0 Hz), 83.3, 25.1, 25.0, 20.9, -2.4, -2.9. HRMS (FAB) calcd for C<sub>29</sub>H<sub>33</sub>BF<sub>2</sub>O<sub>2</sub>Si (M<sup>+</sup>) 490.2305, found 490.2322.

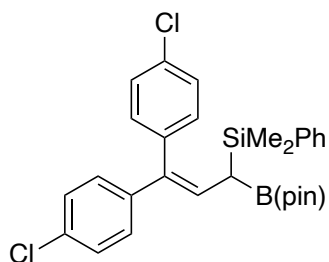

**Compound 3ea.** Hexane/EtOAc = 30/1 was used for silica gel chromatography. Yellow solid (70.5 mg, 0.135 mmol; 45% yield).

$^1\text{H}$  NMR ( $\text{CDCl}_3$ ):  $\delta$  7.43-7.36 (m, 2H), 7.36-7.26 (m, 3H), 7.22 (d,  $^3J_{\text{HH}} = 8.7$  Hz, 2H), 7.15 (d,  $^3J_{\text{HH}} = 8.2$  Hz, 2H), 6.96 (d,  $^3J_{\text{HH}} = 8.7$  Hz, 2H), 6.72 (d,  $^3J_{\text{HH}} = 8.2$  Hz, 2H), 6.20 (d,  $^3J_{\text{HH}} = 12.8$  Hz, 1H), 2.02 (d,  $^3J_{\text{HH}} = 12.8$  Hz, 1H), 1.21 (s, 6H), 1.19 (s, 6H), 0.37 (s, 3H), 0.32 (s, 3H).  $^{13}\text{C}\{^1\text{H}\}$  NMR ( $\text{CDCl}_3$ ):  $\delta$  141.6, 138.4, 137.7, 136.3, 134.0, 132.5, 132.2, 131.6, 129.2, 128.6, 128.5, 128.3, 128.2, 127.7, 83.3, 25.1, 25.0, 21.3, -2.4, -3.0. HRMS (FAB) calcd for  $\text{C}_{29}\text{H}_{33}\text{BCl}_2\text{O}_2\text{Si}$  ( $\text{M}^+$ ) 522.1714, found 522.1721.

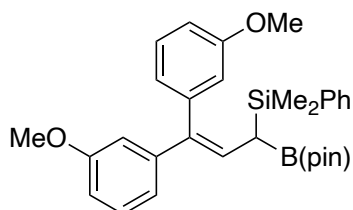

**Compound 3fa.** Hexane/EtOAc = 10/1 was used for silica gel chromatography. Colorless oil (100 mg, 0.195 mmol; 65% yield).

$^1\text{H}$  NMR ( $\text{CDCl}_3$ ):  $\delta$  7.49-7.42 (m, 2H), 7.36-7.26 (m, 3H), 7.19 (t,  $^3J_{\text{HH}} = 7.8$  Hz, 1H), 7.12 (t,  $^3J_{\text{HH}} = 7.8$  Hz, 1H), 6.78 (ddd,  $^3J_{\text{HH}} = 8.2$  Hz and  $^4J_{\text{HH}} = 2.3$  and 0.9 Hz, 1H), 6.75-6.68 (m, 2H), 6.66 (dd,  $^4J_{\text{HH}} = 2.3$  and 1.8 Hz, 1H), 6.52 (dd,  $^3J_{\text{HH}} = 7.8$  Hz and  $^4J_{\text{HH}} = 1.4$  Hz, 1H), 6.50 (dd,  $^4J_{\text{HH}} = 2.8$  and 1.4 Hz, 1H), 6.23 (d,  $^3J_{\text{HH}} = 12.4$  Hz, 1H), 3.74 (s, 3H), 3.73 (s, 3H), 2.11 (d,  $^3J_{\text{HH}} = 12.4$  Hz, 1H), 1.20 (s, 6H), 1.17 (s, 6H), 0.37 (s, 3H), 0.33 (s, 3H).  $^{13}\text{C}\{^1\text{H}\}$  NMR ( $\text{CDCl}_3$ ):  $\delta$  159.5, 159.4, 145.0, 141.7, 138.2, 138.1, 134.1, 129.3, 129.1, 128.9, 127.6, 122.9, 119.8, 115.5, 113.1, 112.6, 111.4, 83.1, 55.3, 55.2, 25.0, 20.9, -2.4, -2.7. HRMS (FAB) calcd for  $\text{C}_{31}\text{H}_{39}\text{BO}_4\text{Si}$  ( $\text{M}^+$ ) 514.2705, found 514.2711.

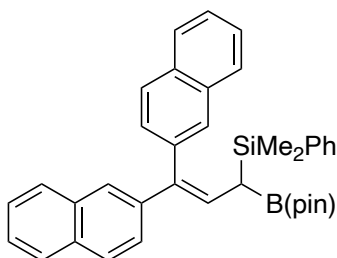

**Compound 3ga.** The reaction was conducted on a 2.00 mmol scale. Hexane/EtOAc = 30/1 was used



for silica gel chromatography. The solid thus obtained was washed with hexane and no GPC purification was performed. Pale yellow solid (758 mg, 1.37 mmol; 68% yield). The structure was confirmed by X-ray crystallographic analysis after recrystallization from CH<sub>2</sub>Cl<sub>2</sub>/MeOH.

<sup>1</sup>H NMR (CDCl<sub>3</sub>): δ 7.88-7.82 (m, 1H), 7.77 (d, <sup>3</sup>J<sub>HH</sub> = 8.3 Hz, 1H), 7.77-7.69 (m, 2H), 7.68 (d, <sup>3</sup>J<sub>HH</sub> = 8.3 Hz, 1H), 7.66-7.60 (m, 1H), 7.52-7.43 (m, 4H), 7.42-7.33 (m, 6H), 7.32-7.27 (m, 2H), 7.07 (dd, <sup>3</sup>J<sub>HH</sub> = 8.3 Hz and <sup>4</sup>J<sub>HH</sub> = 1.5 Hz, 1H), 6.45 (d, <sup>3</sup>J<sub>HH</sub> = 12.2 Hz, 1H), 2.20 (d, <sup>3</sup>J<sub>HH</sub> = 12.7 Hz, 1H), 1.24 (s, 6H), 1.21 (s, 6H), 0.41 (s, 3H), 0.34 (s, 3H). <sup>13</sup>C{<sup>1</sup>H} NMR (CDCl<sub>3</sub>): δ 141.0, 138.4, 138.1, 138.0, 134.2, 133.63, 133.56, 132.5, 132.4, 129.2, 129.0, 128.5, 128.2, 128.1, 127.9, 127.8, 127.7, 127.6, 127.5, 126.0, 125.9, 125.8, 125.7, 125.4, 83.2, 25.1, 25.0, 21.2, -2.4, -2.8. HRMS (FAB) calcd for C<sub>37</sub>H<sub>39</sub>BO<sub>2</sub>Si (M<sup>+</sup>) 554.2807, found 554.2810.

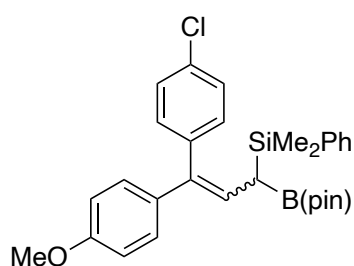

**Compound 3ha.** Hexane/EtOAc = 20/1 → 10/1 was used for silica gel chromatography. Yellow oil (86.5 mg, 0.167 mmol; 56% yield, dr = 52/48).

<sup>1</sup>H NMR (CDCl<sub>3</sub>): δ 7.47-7.38 (m, 2H), 7.36-7.26 (m, 3H), 7.21 (d, <sup>3</sup>J<sub>HH</sub> = 8.7 Hz, 0.96H), 7.14 (d, <sup>3</sup>J<sub>HH</sub> = 8.2 Hz, 1.04H), 7.03-6.94 (m, 2H), 6.85-6.71 (m, 4H), 6.14 (d, <sup>3</sup>J<sub>HH</sub> = 12.4 Hz, 0.52H), 6.12 (d, <sup>3</sup>J<sub>HH</sub> = 12.4 Hz, 0.48H), 3.82 (s, 1.56H), 3.77 (s, 1.44H), 2.11 (d, <sup>3</sup>J<sub>HH</sub> = 12.4 Hz, 0.52H), 2.00 (d, <sup>3</sup>J<sub>HH</sub> = 12.4 Hz, 0.48H), 1.20 (s, 6.24H), 1.18 (s, 5.76H), 0.36 (s, 1.44H), 0.35 (s, 1.56H), 0.32 (s, 1.44H), 0.31 (s, 1.56H). <sup>13</sup>C{<sup>1</sup>H} NMR (CDCl<sub>3</sub>): δ 158.4, 158.3, 142.4, 139.2, 138.0, 137.1, 136.8, 136.1, 134.1, 132.3, 132.2, 131.8, 131.7, 131.4, 129.1, 128.5, 128.4, 128.1, 128.0, 127.7, 127.6, 126.0, 113.8, 113.5, 83.2, 55.4, 55.3, 25.1, 25.0, 20.9, 20.6, -2.4, -2.5, -2.8, -3.0. HRMS (FAB) calcd for C<sub>30</sub>H<sub>36</sub>BClO<sub>3</sub>Si (M<sup>+</sup>) 518.2210, found 518.2213.

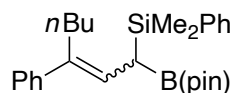

**Compound 3ia.** Hexane/EtOAc = 50/1 was used for silica gel chromatography. Reversed phase chromatography was performed with MeCN instead of GPC purification. Colorless oil (38.7 mg, 89.1 μmol; 30% yield, dr = 84/16). The stereochemistry was assigned by analogy with compound **3ja**.

<sup>1</sup>H NMR (CDCl<sub>3</sub>): δ 7.58-7.50 (m, 1.68H), 7.44-7.38 (m, 0.32H), 7.37-7.11 (m, 7.68H), 6.88-6.83 (m, 0.32H), 5.82 (d, <sup>3</sup>J<sub>HH</sub> = 11.9 Hz, 0.84H), 5.55 (d, <sup>3</sup>J<sub>HH</sub> = 12.4 Hz, 0.16H), 2.36-2.06 (m, 2.84H), 1.86 (d, <sup>3</sup>J<sub>HH</sub> = 11.9 Hz, 0.16H), 1.36-0.98 (m, 16H), 0.84 (t, <sup>3</sup>J<sub>HH</sub> = 6.9 Hz, 0.48H), 0.80 (t, <sup>3</sup>J<sub>HH</sub> = 7.1 Hz, 2.52H), 0.42 (s, 2.52H), 0.39 (s, 2.52H), 0.28 (s, 0.48H), 0.27 (s, 0.48H). <sup>13</sup>C{<sup>1</sup>H} NMR (CDCl<sub>3</sub>; *E*-isomer): δ 144.2, 138.4, 136.9, 134.1, 129.1, 128.1, 127.6, 126.4, 125.9, 125.5, 83.1, 30.7, 29.2, 25.0, 23.0, 19.9, 14.1, -2.7, -2.8. HRMS (FAB) calcd for C<sub>27</sub>H<sub>39</sub>BO<sub>2</sub>Si (M<sup>+</sup>) 434.2807, found 434.2822.

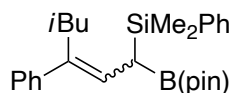

**Compound 3ja.** The reaction was conducted on a 2.00 mmol scale. Hexane/EtOAc = 30/1 was used for silica gel chromatography. Reversed phase chromatography was performed with MeCN instead of GPC purification. Colorless oil (321 mg, 0.740 mmol; 37% yield, *E* pure (*E/Z* = 74/26 before purification)). The stereochemistry of the major isomer was determined by the NOE experiment.

$^1\text{H}$  NMR ( $\text{CDCl}_3$ ; *E*-isomer):  $\delta$  7.56-7.50 (m, 2H), 7.37-7.28 (m, 3H), 7.28-7.22 (m, 4H), 7.20-7.12 (m, 1H), 5.85 (d,  $^3J_{\text{HH}} = 12.2$  Hz, 1H), 2.15 (d,  $^3J_{\text{HH}} = 12.2$  Hz, 1H), 2.11 (d,  $^3J_{\text{HH}} = 7.3$  Hz, 2H), 1.55-1.42 (m, 1H), 1.18 (s, 6H), 1.15 (s, 6H), 0.78 (d,  $^3J_{\text{HH}} = 6.4$  Hz, 3H), 0.72 (d,  $^3J_{\text{HH}} = 6.8$  Hz, 3H), 0.39 (s, 3H), 0.35 (s, 3H).  $^{13}\text{C}\{^1\text{H}\}$  NMR ( $\text{CDCl}_3$ ; *E*-isomer):  $\delta$  144.6, 138.5, 136.3, 134.1, 129.1, 128.1, 127.6, 126.71, 126.67, 125.9, 83.1, 38.1, 27.1, 25.0, 24.9, 23.2, 21.6, 20.1, -2.7, -2.8. HRMS (FAB) calcd for  $\text{C}_{27}\text{H}_{39}\text{BO}_2\text{Si}$  ( $\text{M}^+$ ) 434.2807, found 434.2798.

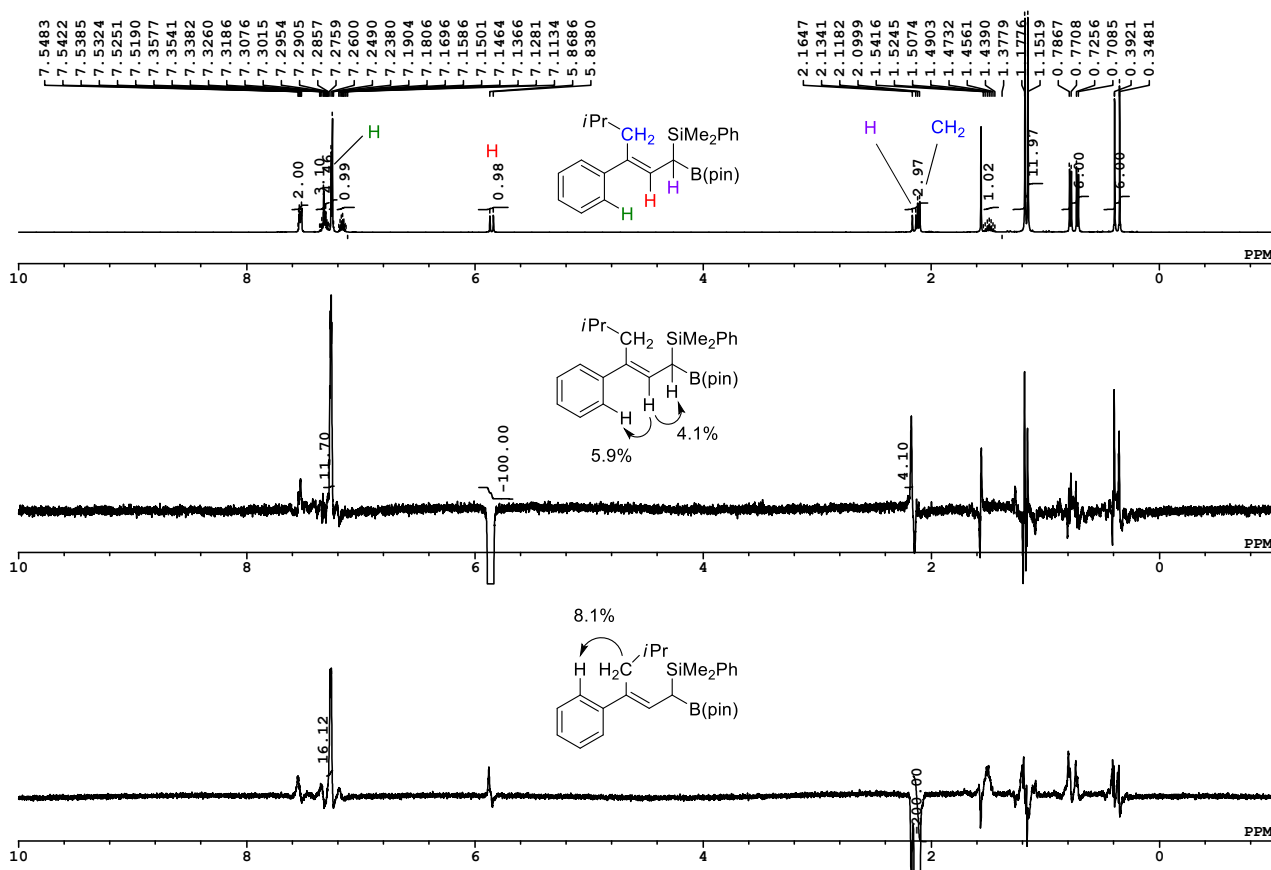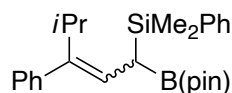

**Compound 3ka.** Hexane/EtOAc = 50/1  $\rightarrow$  30/1 was used for silica gel chromatography. Reversed phase chromatography was performed with MeCN instead of GPC purification. Colorless oil (60.5 mg, 0.144 mmol; 48% yield, dr = 53/47). The stereochemistry was assigned by analogy with compound 3ja.

$^1\text{H}$  NMR ( $\text{CDCl}_3$ ):  $\delta$  7.62-7.55 (m, 1.06H), 7.47-7.40 (m, 0.94H), 7.40-7.28 (m, 3H), 7.26-7.13 (m, 3H), 7.13-7.06 (m, 1.06H), 6.74 (d,  $^3J_{\text{HH}} = 6.8$  Hz, 0.94H), 5.54 (d,  $^3J_{\text{HH}} = 11.9$  Hz, 0.47H), 5.44 (d,  $^3J_{\text{HH}} = 12.4$  Hz, 0.53H), 2.79 (sept,  $^3J_{\text{HH}} = 7.0$  Hz, 0.53H), 2.52 (sept,  $^3J_{\text{HH}} = 6.8$  Hz, 0.47H), 2.17 (d,  $^3J_{\text{HH}} = 11.9$  Hz, 0.53H), 1.66 (d,  $^3J_{\text{HH}} = 12.4$  Hz, 0.47H), 1.25-1.12 (m, 12H), 1.03 (d,  $^3J_{\text{HH}} = 6.9$  Hz, 1.59H), 0.97 (d,  $^3J_{\text{HH}} = 6.8$  Hz, 1.41H), 0.94 (d,  $^3J_{\text{HH}} = 6.9$  Hz, 1.41H), 0.67 (d,  $^3J_{\text{HH}} = 6.9$  Hz, 1.59H), 0.44 (s, 1.59H), 0.42 (s, 1.59H), 0.31 (s, 1.41H), 0.29 (s, 1.41H).  $^{13}\text{C}\{^1\text{H}\}$  NMR ( $\text{CDCl}_3$ ):  $\delta$  144.5, 144.1, 143.4, 141.2, 138.6, 138.5, 134.2, 134.1, 129.5, 129.1, 129.0, 128.9, 127.8, 127.6, 127.5, 127.4, 125.9, 125.8, 125.1, 120.9, 83.1, 82.9, 36.5, 28.8, 25.0, 24.94, 24.92, 24.89, 22.7, 22.5, 22.1, 20.9, 18.41, 18.37, -2.6, -2.97, -2.99. HRMS (FAB) calcd for  $\text{C}_{26}\text{H}_{37}\text{BO}_2\text{Si}$  ( $\text{M}^+$ ) 420.2650, found 420.2656.

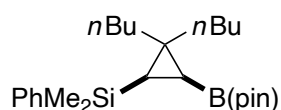

**Compound 5la.** Silica gel chromatography was not performed. Colorless oil (65.9 mg, 0.159 mmol; 53% yield). The stereochemistry was assigned based on the H–H coupling constant on the cyclopropane ring.

$^1\text{H}$  NMR (acetone- $d_6$ ):  $\delta$  7.64-7.58 (m, 2H), 7.37-7.30 (m, 3H), 1.73 (ddd,  $^2J_{\text{HH}} = 13.7$  Hz and  $^3J_{\text{HH}} = 10.3$  and 4.9 Hz, 1H), 1.67-1.58 (m, 1H), 1.50 (td,  $J_{\text{HH}} = 12.4$  Hz and  $^3J_{\text{HH}} = 3.4$  Hz, 1H), 1.45-1.19 (m, 8H), 1.17 (s, 6H), 1.14 (s, 6H), 1.04-0.95 (m, 1H), 0.90 (t,  $^3J_{\text{HH}} = 7.3$  Hz, 3H), 0.86 (t,  $^3J_{\text{HH}} = 7.3$  Hz, 3H), 0.40 (s, 3H), 0.36 (s, 3H), 0.07 (d,  $^3J_{\text{HH}} = 11.2$  Hz, 1H), 0.03 (d,  $^3J_{\text{HH}} = 11.2$  Hz, 1H).  $^{13}\text{C}\{^1\text{H}\}$  NMR ( $\text{CDCl}_3$ ):  $\delta$  141.9, 133.8, 128.4, 127.6, 82.9, 41.1, 33.6, 30.9, 30.1, 29.3, 25.3, 24.7, 23.5, 23.1, 20.0, 14.4, 14.3, 0.4, -0.6. Anal. Calcd for  $\text{C}_{25}\text{H}_{43}\text{BO}_2\text{Si}$ : C, 72.44; H, 10.46. Found: C, 72.67; H, 10.57.

### General Procedure for Equation 1.

KOtBu (3.4 mg, 30  $\mu\text{mol}$ ) was dissolved in THF (0.5 mL) at 60  $^\circ\text{C}$ . Silylboronate **2** (0.360 mmol), cyclopropene **1a** (57.7 mg, 0.300 mmol), and THF (1.0 mL) were added to it, and the resulting mixture was stirred for 20 h at 60  $^\circ\text{C}$ . This was passed through a pad of silica gel with EtOAc, and the solvent was removed under vacuum. The residue was chromatographed on silica gel and further purified by GPC with  $\text{CHCl}_3$  to afford compound **3**.

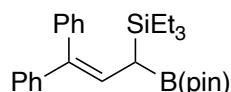

**Compound 3ab.** Hexane/EtOAc = 30/1 was used for silica gel chromatography. White solid (113 mg, 0.259 mmol; 86% yield).

$^1\text{H}$  NMR ( $\text{CDCl}_3$ ):  $\delta$  7.37-7.30 (m, 2H), 7.27-7.11 (m, 8H), 6.29 (d,  $^3J_{\text{HH}} = 12.8$  Hz, 1H), 1.98 (d,  $^3J_{\text{HH}} = 12.8$  Hz, 1H), 1.26 (s, 6H), 1.25 (s, 6H), 0.87 (t,  $^3J_{\text{HH}} = 7.8$  Hz, 9H), 0.64-0.52 (m, 6H).  $^{13}\text{C}\{^1\text{H}\}$  NMR ( $\text{CDCl}_3$ ):  $\delta$  143.9, 140.6, 137.7, 130.6, 128.4, 128.3, 128.1, 127.2, 126.6, 126.1, 83.0, 25.2, 25.0, 17.8, 7.6, 3.8. HRMS (FAB) calcd for  $\text{C}_{27}\text{H}_{39}\text{BO}_2\text{Si}$  ( $\text{M}^+$ ) 434.2807, found 434.2821.

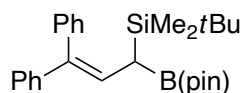

**Compound 3ac.** Hexane/EtOAc = 20/1 was used for silica gel chromatography. Orange solid (90.1 mg, 0.207 mmol; 69% yield).

$^1\text{H}$  NMR ( $\text{CDCl}_3$ ):  $\delta$  7.38-7.31 (m, 2H), 7.29-7.10 (m, 8H), 6.29 (d,  $^3J_{\text{HH}} = 12.4$  Hz, 1H), 1.98 (d,  $^3J_{\text{HH}} = 12.4$  Hz, 1H), 1.26 (s, 6H), 1.25 (s, 6H), 0.78 (s, 9H), 0.12 (s, 3H),  $-0.00$  (s, 3H).  $^{13}\text{C}\{^1\text{H}\}$  NMR ( $\text{CDCl}_3$ ):  $\delta$  143.7, 140.6, 137.2, 130.5, 128.6, 128.4, 128.1, 127.2, 126.7, 126.1, 83.1, 26.9, 25.3, 24.8, 18.5, 18.0,  $-4.9$ ,  $-5.9$ . HRMS (FAB) calcd for  $\text{C}_{27}\text{H}_{39}\text{BO}_2\text{Si}$  ( $\text{M}^+$ ) 434.2807, found 434.2812.

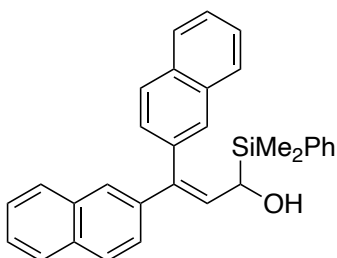

#### Procedure for Scheme 2a.

A mixture of compound **3ga** (55.5 mg, 0.100 mmol) and  $\text{NaBO}_3 \cdot 4\text{H}_2\text{O}$  (46.2 mg, 0.300 mmol) in THF (0.5 mL) and  $\text{H}_2\text{O}$  (0.5 mL) was stirred for 13 h at room temperature. The reaction was quenched with 5%  $\text{Na}_2\text{S}_2\text{O}_3$  aq and this was extracted with  $\text{Et}_2\text{O}$ . The solvent was removed under vacuum and the residue was purified by silica gel preparative TLC with hexane/EtOAc = 10/1. This was further purified by GPC with  $\text{CHCl}_3$  to afford compound **6** as a white amorphous (30.3 mg, 68.1  $\mu\text{mol}$ ; 68% yield).

$^1\text{H}$  NMR ( $\text{CDCl}_3$ ):  $\delta$  7.90-7.83 (m, 1H), 7.82-7.77 (m, 2H), 7.77-7.69 (m, 2H), 7.69-7.63 (m, 1H), 7.58-7.53 (m, 2H), 7.53-7.47 (m, 3H), 7.47-7.40 (m, 5H), 7.40-7.33 (m, 2H), 7.15 (dd,  $^3J_{\text{HH}} = 8.3$  Hz and  $^4J_{\text{HH}} = 1.5$  Hz, 1H), 6.39 (d,  $^3J_{\text{HH}} = 11.2$  Hz, 1H), 4.41 (d,  $^3J_{\text{HH}} = 11.2$  Hz, 1H), 1.40 (bs, 1H), 0.412 (s, 3H), 0.408 (s, 3H).  $^{13}\text{C}\{^1\text{H}\}$  NMR ( $\text{CDCl}_3$ ):  $\delta$  141.9, 139.7, 137.1, 136.2, 134.5, 133.41, 133.39, 132.9, 132.7, 130.3, 129.7, 128.8, 128.33, 128.27, 128.10, 128.08, 127.9, 127.8, 127.6, 126.9, 126.3, 126.24, 126.16, 126.1, 125.4, 65.9,  $-5.2$ ,  $-5.3$ . HRMS (FAB) calcd for  $\text{C}_{31}\text{H}_{27}\text{OSi}$  ( $\text{M}-\text{H}^-$ ) 443.1826, found 443.1829.

#### Procedure for Scheme 2b.

$\text{KO}t\text{Bu}$  (3.4 mg, 30  $\mu\text{mol}$ ) was dissolved in THF (1.5 mL) at 40  $^\circ\text{C}$ . Silylboronate **2a** (98.1  $\mu\text{L}$ , 0.360 mmol) and cyclopropene **1g** (87.4 mg, 0.299 mmol) were added to it, and the resulting mixture was stirred for 20 h at 40  $^\circ\text{C}$ . This was cooled to 0  $^\circ\text{C}$ , and 1 M  $\text{NaOH}$  aq (0.60 mL) and 30 wt%  $\text{H}_2\text{O}_2$  aq (0.60 mL) were added to it. The mixture was stirred for 3 h at 0  $^\circ\text{C}$  and the reaction was quenched with 5 wt%  $\text{Na}_2\text{SO}_3$  aq. This was extracted with EtOAc and the solvent was removed under vacuum. The residue was purified by preparative TLC with hexane/EtOAc = 15/1  $\rightarrow$  10/1 and further purified by GPC with  $\text{CHCl}_3$  to afford compound **6** as a colorless viscous oil (68.4 mg, 0.154 mmol; 51% yield).

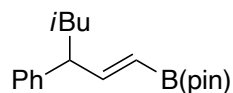

### Procedure for Scheme 2c.

TfOH (9.70  $\mu$ L, 0.111 mmol) was added to a solution of compound **3ja** (43.6 mg, 0.100 mmol) in  $\text{CH}_2\text{Cl}_2$  (1.0 mL) at 0  $^\circ\text{C}$ , and the mixture was stirred for 1 h at 0  $^\circ\text{C}$ . The reaction was quenched with saturated  $\text{NaHCO}_3\text{aq}$ , and this was extracted with  $\text{Et}_2\text{O}$ . The organic layer was dried over  $\text{MgSO}_4$ , filtered, and concentrated under vacuum. The residue was purified by GPC with  $\text{CHCl}_3$  and further chromatographed on silica gel with hexane/ $\text{EtOAc}$  = 20/1 to afford compound **7** as a colorless oil (20.2 mg, 67.3  $\mu$ mol; 67% yield).

$^1\text{H}$  NMR ( $\text{CDCl}_3$ ):  $\delta$  7.31-7.25 (m, 2H), 7.22-7.15 (m, 3H), 6.69 (dd,  $^3J_{\text{HH}} = 18.1$  and 7.3 Hz, 1H), 5.40 (dd,  $^3J_{\text{HH}} = 17.6$  Hz and  $^4J_{\text{HH}} = 1.4$  Hz, 1H), 3.42 (q,  $^3J_{\text{HH}} = 7.3$  Hz, 1H), 1.66-1.57 (m, 2H), 1.54-1.41 (m, 1H), 0.88 (d,  $^3J_{\text{HH}} = 6.8$  Hz, 3H), 0.86 (d,  $^3J_{\text{HH}} = 6.8$  Hz, 3H).  $^{13}\text{C}\{^1\text{H}\}$  NMR ( $\text{CDCl}_3$ ):  $\delta$  157.4, 143.8, 128.6, 128.0, 126.3, 83.2, 49.7, 44.4, 25.4, 24.9, 22.8, 22.6. HRMS (FAB) calcd for  $\text{C}_{19}\text{H}_{30}\text{BO}_2$  ( $\text{M}+\text{H}^+$ ) 301.2333, found 301.2338.

## IV. X-ray Crystal Structure

### Compound **3ga**

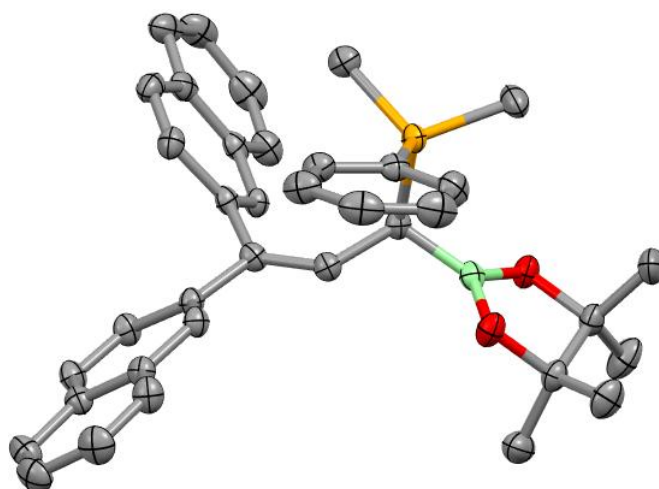

A colorless  $\text{CH}_2\text{Cl}_2$  solution of compound **3ga** was prepared. Crystals suitable for X-ray analysis were obtained by layering MeOH and slow diffusion of the solvents at room temperature. The crystal structure has been deposited at the Cambridge Crystallographic Data Centre (deposition number: CCDC 2340586). The data can be obtained free of charge via the Internet at <https://www.ccdc.cam.ac.uk/structures/>.

### Crystal Data and Structure Refinement.

|                      |                                                  |                       |
|----------------------|--------------------------------------------------|-----------------------|
| Empirical Formula    | $\text{C}_{37}\text{H}_{39}\text{BO}_2\text{Si}$ |                       |
| Formula Weight       | 554.63                                           |                       |
| Temperature          | $113 \pm 2$ K                                    |                       |
| Wavelength           | 0.71075 Å                                        |                       |
| Crystal System       | Monoclinic                                       |                       |
| Space Group          | $C2/c$                                           |                       |
| Unit Cell Dimensions | $a = 16.206$ (4) Å                               | $\alpha = 90^\circ$   |
|                      | $b = 14.988$ (3) Å                               | $\beta = 99.955$ (6)° |
|                      | $c = 26.246$ (5) Å                               | $\gamma = 90^\circ$   |

|                                   |                                                   |
|-----------------------------------|---------------------------------------------------|
| Volume                            | 6279(2) Å <sup>3</sup>                            |
| Z Value                           | 8                                                 |
| Calculated Density                | 1.173 g/cm <sup>3</sup>                           |
| Absorption coefficient            | 0.106 mm <sup>-1</sup>                            |
| F(000)                            | 2369.872                                          |
| Crystal size                      | 0.240 x 0.130 x 0.100 mm                          |
| Theta Range for Data Collection   | 3.14–27.50°                                       |
| Index Ranges                      | -20 ≤ h ≤ 19, 0 ≤ k ≤ 19, 0 ≤ l ≤ 34              |
| Reflections Collected             | 54311                                             |
| Independent Reflections           | 7169 [R(int) = 0.0475]                            |
| Completeness to Theta = 25.2425°  | 99.74%                                            |
| Absorption Correction             | Semi-empirical from equivalents                   |
| Max. and Min. Transmission        | 1.000 and 0.857                                   |
| Refinement Method                 | Full-matrix least-squares on F <sup>2</sup>       |
| Data / Restraints / Parameters    | 7169 / 67 / 417                                   |
| Goodness-of-Fit on F <sup>2</sup> | 1.0505                                            |
| Final R Indices [I > 2σ(I)]       | R1 = 0.0427, wR2 = 0.1058                         |
| R Indices (All Data)              | R1 = 0.0566, wR2 = 0.1112                         |
| Largest Diff. Peak and Hole       | 0.4525 and -0.2832 e <sup>-</sup> /Å <sup>3</sup> |

## V. Theoretical Calculations

All calculations were performed with the Gaussian 16 package.<sup>7</sup> Geometrical optimizations were conducted using the DFT-M06 functional.<sup>8</sup> The 6-31+G(d) basis set was used for all atoms. Frequency analyses were carried out to confirm that each structure is a local minimum (no imaginary frequency) or a transition state (only one imaginary frequency). The energies were evaluated by single-point calculations using the same level of theory as the geometry optimization, including solvation effect by SCRF-SMD model<sup>9</sup> using THF as solvent. Natural bond orbital (NBO) calculations were performed using NBO 3.1.<sup>10</sup> Energy diagrams were created with EveRplot.<sup>11</sup> The 3D optimized structures were displayed by the CYLview visualization program.<sup>12</sup> The output files were uploaded at <https://doi.org/10.5281/zenodo.11212804>.

We assessed the Gibbs energy changes at standard conditions (298.15 K and 1 atm), and the resulting Gibbs energy profiles are depicted in Figure S1.

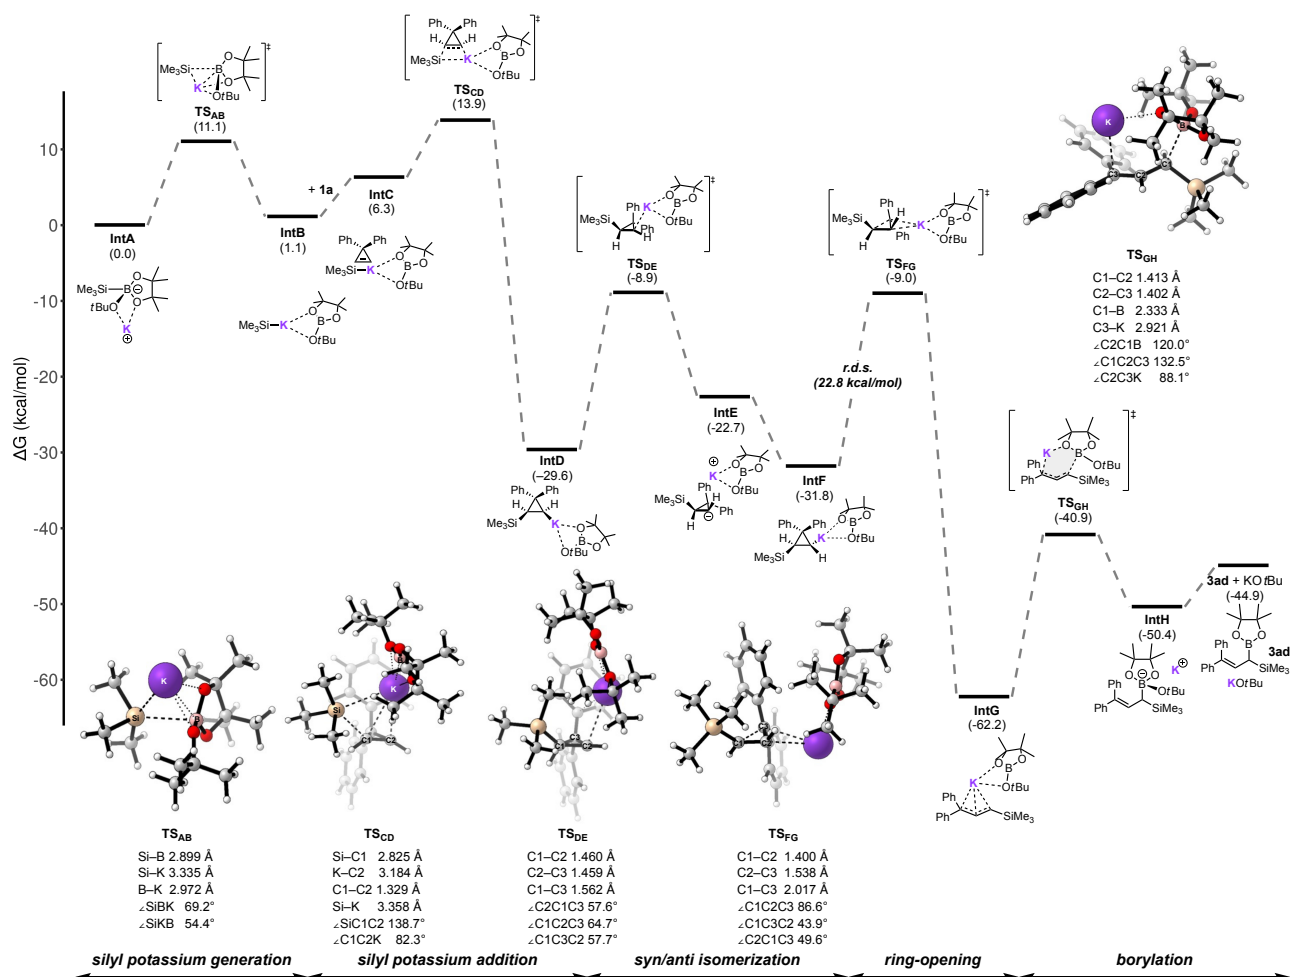

**Figure S1.** Calculated energy diagram for the KOtBu-catalyzed *gem*-silylborylation of **1a** with trimethylsilylboronic acid pinacol ester.



We theoretically examined the ring-opening step of *syn*-isomer **IntD** and *anti*-isomer **IntF** to afford  $\pi$ -allylpotassium **IntG** (Figure S2). As a result, the *syn*-isomer **IntD** (0 kcal/mol) was found to be energetically unfavorable for direct ring-opening process through **TS<sub>syn-opening</sub>** ( $\Delta G^{\circ\dagger}_{\text{syn-opening}} = 27.8$  kcal/mol). Therefore, the *syn/anti*-isomerization of **IntD** could undergo through **TS<sub>DE</sub>** to yield *anti*-isomer **IntF** ( $\Delta G^{\circ\dagger}_{\text{DE}} = 20.7$  kcal/mol;  $\Delta G^{\circ}_{\text{DF}} = -2.2$  kcal/mol). The ring-opening process **TS<sub>FG</sub>** of *anti*-isomer **IntF** ( $-2.2$  kcal/mol) exhibited a lower energy barrier ( $\Delta G^{\circ\dagger}_{\text{FG}} = 22.8$  kcal/mol) than that of the *syn*-isomer. From the results of natural population analysis, the transition-state of the *anti*-isomer has more delocalized negative charge on the cyclopropane ring, leading to a lower activation energy barrier for **TS<sub>FG</sub>**. These results indicated that the ring-opening process proceeds via the *syn*-to-*anti* isomerization of **IntD**.

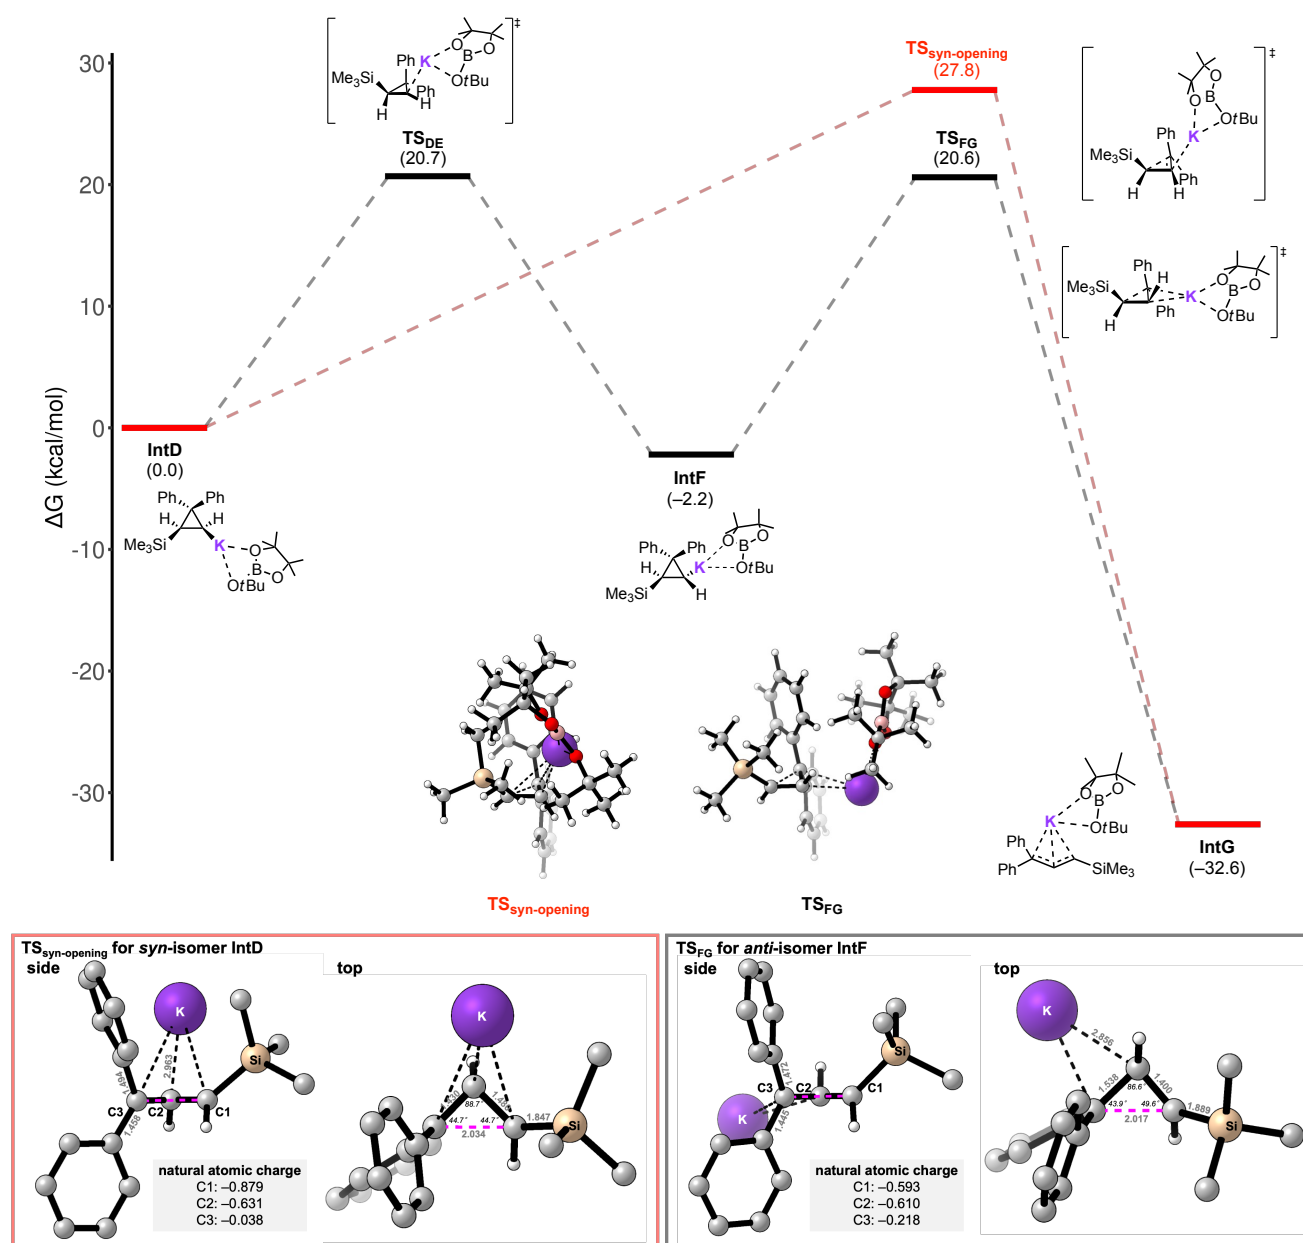

**Figure S2.** Calculated energy diagram for the ring-opening process of **IntD** and **IntF**.

## Cartesian Coordinates of Optimized Species

| IntA          |               |             | Coordinates (Angstroms) |          |          |    |    |   |          |          |          |
|---------------|---------------|-------------|-------------------------|----------|----------|----|----|---|----------|----------|----------|
| Center Number | Atomic Number | Atomic Type | Coordinates (Angstroms) |          |          |    |    |   |          |          |          |
|               |               |             | x                       | y        | z        |    |    |   |          |          |          |
| 1             | 14            | 0           | 0.979394                | -1.84415 | -0.5142  | 32 | 1  | 0 | -2.78552 | 1.411844 | 1.970597 |
| 2             | 6             | 0           | 2.816099                | -1.95598 | 0.037202 | 33 | 6  | 0 | -2.79189 | -1.56031 | 0.225512 |
| 3             | 1             | 0           | 3.489081                | -1.27056 | -0.49754 | 34 | 1  | 0 | -2.65386 | -2.18616 | 1.118527 |
| 4             | 1             | 0           | 2.945456                | -1.75907 | 1.115364 | 35 | 1  | 0 | -3.86042 | -1.57176 | -0.03343 |
| 5             | 1             | 0           | 3.186979                | -2.97926 | -0.13835 | 36 | 1  | 0 | -2.23187 | -2.0191  | -0.59983 |
| 6             | 6             | 0           | 0.240827                | -3.31934 | 0.457291 | 37 | 6  | 0 | 2.120623 | 1.17057  | -1.8302  |
| 7             | 1             | 0           | 0.164426                | -3.10967 | 1.536911 | 38 | 1  | 0 | 1.194213 | 1.053546 | -2.40682 |
| 8             | 1             | 0           | -0.76647                | -3.59033 | 0.110401 | 39 | 1  | 0 | 2.79912  | 1.827121 | -2.39473 |
| 9             | 1             | 0           | 0.881512                | -4.20851 | 0.33831  | 40 | 1  | 0 | 2.605544 | 0.189452 | -1.74755 |
| 10            | 6             | 0           | -2.16403                | 0.718151 | -0.76062 | 41 | 6  | 0 | 1.289491 | 3.194779 | -0.6607  |
| 11            | 6             | 0           | -2.29587                | -0.14838 | 0.527642 | 42 | 1  | 0 | 0.38299  | 3.174368 | -1.2796  |
| 12            | 5             | 0           | -0.02182                | -0.02528 | -0.15401 | 43 | 1  | 0 | 1.033418 | 3.64718  | 0.308748 |
| 13            | 8             | 0           | -0.89413                | 0.334687 | -1.27003 | 44 | 1  | 0 | 2.03025  | 3.840233 | -1.15647 |
| 14            | 8             | 0           | -0.95797                | -0.21143 | 1.001727 | 45 | 6  | 0 | 3.130285 | 1.862045 | 0.346698 |
| 15            | 8             | 0           | 0.911107                | 1.041804 | 0.315242 | 46 | 1  | 0 | 3.536834 | 0.85624  | 0.530835 |
| 16            | 6             | 0           | 1.837115                | 1.783287 | -0.46136 | 47 | 1  | 0 | 3.900181 | 2.448337 | -0.17598 |
| 17            | 6             | 0           | 0.955549                | -2.43016 | -2.32616 | 48 | 1  | 0 | 2.945971 | 2.348752 | 1.318142 |
| 18            | 1             | 0           | -0.08263                | -2.51487 | -2.68374 | 49 | 19 | 0 | 0.908924 | 0.124022 | 2.745381 |
| 19            | 1             | 0           | 1.474104                | -1.73363 | -3.00164 |    |    |   |          |          |          |
| 20            | 1             | 0           | 1.429039                | -3.41926 | -2.43494 |    |    |   |          |          |          |
| 21            | 6             | 0           | -3.22028                | 0.439213 | -1.8168  |    |    |   |          |          |          |
| 22            | 1             | 0           | -4.23461                | 0.614449 | -1.42742 |    |    |   |          |          |          |
| 23            | 1             | 0           | -3.07086                | 1.110364 | -2.67465 |    |    |   |          |          |          |
| 24            | 1             | 0           | -3.16166                | -0.59145 | -2.18757 |    |    |   |          |          |          |
| 25            | 6             | 0           | -2.16807                | 2.214223 | -0.45181 |    |    |   |          |          |          |
| 26            | 1             | 0           | -1.88636                | 2.763956 | -1.36104 |    |    |   |          |          |          |
| 27            | 1             | 0           | -3.16324                | 2.567364 | -0.14306 |    |    |   |          |          |          |
| 28            | 1             | 0           | -1.44285                | 2.464224 | 0.332646 |    |    |   |          |          |          |
| 29            | 6             | 0           | -3.17734                | 0.45269  | 1.610211 |    |    |   |          |          |          |
| 30            | 1             | 0           | -4.20313                | 0.613014 | 1.245899 |    |    |   |          |          |          |
| 31            | 1             | 0           | -3.23478                | -0.23394 | 2.467603 |    |    |   |          |          |          |

| TS <sub>AB</sub> |               |             |                         |          |          |   |   |   |    |    |   |          |          |          |
|------------------|---------------|-------------|-------------------------|----------|----------|---|---|---|----|----|---|----------|----------|----------|
| Center Number    | Atomic Number | Atomic Type | Coordinates (Angstroms) |          |          | x | y | z |    |    |   |          |          |          |
|                  |               |             | x                       | y        | z        |   |   |   |    |    |   |          |          |          |
| 1                | 14            | 0           | 1.555                   | -1.59755 | -0.54601 |   |   |   | 34 | 1  | 0 | -1.59473 | -2.65166 | 1.242984 |
| 2                | 6             | 0           | 3.487899                | -1.32709 | -0.49153 |   |   |   | 35 | 1  | 0 | -2.87055 | -2.69056 | 0.003862 |
| 3                | 1             | 0           | 3.809305                | -0.35704 | -0.90421 |   |   |   | 36 | 1  | 0 | -1.18973 | -2.28349 | -0.44432 |
| 4                | 1             | 0           | 3.873898                | -1.3772  | 0.542652 |   |   |   | 37 | 6  | 0 | 1.595346 | 1.942539 | -1.65095 |
| 5                | 1             | 0           | 4.015057                | -2.11315 | -1.06333 |   |   |   | 38 | 1  | 0 | 0.73647  | 1.594098 | -2.23694 |
| 6                | 6             | 0           | 1.553334                | -3.44123 | 0.089475 |   |   |   | 39 | 1  | 0 | 2.090764 | 2.748764 | -2.21085 |
| 7                | 1             | 0           | 1.844872                | -3.51399 | 1.151933 |   |   |   | 40 | 1  | 0 | 2.305224 | 1.111296 | -1.54709 |
| 8                | 1             | 0           | 0.565636                | -3.92068 | -0.00391 |   |   |   | 41 | 6  | 0 | 0.163662 | 3.599301 | -0.44424 |
| 9                | 1             | 0           | 2.270229                | -4.05782 | -0.48362 |   |   |   | 42 | 1  | 0 | -0.7169  | 3.262734 | -1.00767 |
| 10               | 6             | 0           | -2.46101                | 0.153341 | -0.66555 |   |   |   | 43 | 1  | 0 | -0.16838 | 3.958703 | 0.540159 |
| 11               | 6             | 0           | -2.24565                | -0.70101 | 0.623919 |   |   |   | 44 | 1  | 0 | 0.615403 | 4.442986 | -0.98553 |
| 12               | 5             | 0           | -0.34869                | 0.484588 | 0.122444 |   |   |   | 45 | 6  | 0 | 2.38287  | 2.931126 | 0.495593 |
| 13               | 8             | 0           | -1.11728                | 0.521709 | -1.03766 |   |   |   | 46 | 1  | 0 | 3.099176 | 2.103871 | 0.619825 |
| 14               | 8             | 0           | -1.0668                 | -0.09967 | 1.189108 |   |   |   | 47 | 1  | 0 | 2.898134 | 3.749052 | -0.02623 |
| 15               | 8             | 0           | 0.573088                | 1.440265 | 0.523506 |   |   |   | 48 | 1  | 0 | 2.087269 | 3.292484 | 1.491309 |
| 16               | 6             | 0           | 1.166107                | 2.465527 | -0.28847 |   |   |   | 49 | 19 | 0 | 1.310483 | -0.22536 | 2.483668 |
| 17               | 6             | 0           | 1.29354                 | -1.91613 | -2.43382 |   |   |   |    |    |   |          |          |          |
| 18               | 1             | 0           | 0.267546                | -2.26255 | -2.64149 |   |   |   |    |    |   |          |          |          |
| 19               | 1             | 0           | 1.449436                | -1.00622 | -3.03482 |   |   |   |    |    |   |          |          |          |
| 20               | 1             | 0           | 1.986801                | -2.68882 | -2.81225 |   |   |   |    |    |   |          |          |          |
| 21               | 6             | 0           | -3.10922                | -0.58991 | -1.8148  |   |   |   |    |    |   |          |          |          |
| 22               | 1             | 0           | -4.10469                | -0.95869 | -1.528   |   |   |   |    |    |   |          |          |          |
| 23               | 1             | 0           | -3.23538                | 0.087781 | -2.67004 |   |   |   |    |    |   |          |          |          |
| 24               | 1             | 0           | -2.5037                 | -1.44128 | -2.14658 |   |   |   |    |    |   |          |          |          |
| 25               | 6             | 0           | -3.22263                | 1.444996 | -0.39638 |   |   |   |    |    |   |          |          |          |
| 26               | 1             | 0           | -3.17611                | 2.077895 | -1.2928  |   |   |   |    |    |   |          |          |          |
| 27               | 1             | 0           | -4.28138                | 1.255854 | -0.17149 |   |   |   |    |    |   |          |          |          |
| 28               | 1             | 0           | -2.78458                | 2.007985 | 0.439595 |   |   |   |    |    |   |          |          |          |
| 29               | 6             | 0           | -3.36965                | -0.60571 | 1.636373 |   |   |   |    |    |   |          |          |          |
| 30               | 1             | 0           | -4.31806                | -0.94838 | 1.198321 |   |   |   |    |    |   |          |          |          |
| 31               | 1             | 0           | -3.14786                | -1.25104 | 2.497738 |   |   |   |    |    |   |          |          |          |
| 32               | 1             | 0           | -3.50523                | 0.417352 | 2.005966 |   |   |   |    |    |   |          |          |          |
| 33               | 6             | 0           | -1.96056                | -2.1661  | 0.326952 |   |   |   |    |    |   |          |          |          |

**IntB**

| Center Number | Atomic Number | Atomic Type | Coordinates (Angstroms) |          |          |
|---------------|---------------|-------------|-------------------------|----------|----------|
|               |               |             | x                       | y        | z        |
| 1             | 14            | 0           | 3.178466                | -0.94672 | -0.17665 |
| 2             | 6             | 0           | 4.291366                | 0.483157 | -0.88981 |
| 3             | 1             | 0           | 3.704136                | 1.335846 | -1.26934 |
| 4             | 1             | 0           | 4.974125                | 0.882322 | -0.12172 |
| 5             | 1             | 0           | 4.915123                | 0.117582 | -1.72699 |
| 6             | 6             | 0           | 4.565933                | -2.29242 | 0.036281 |
| 7             | 1             | 0           | 5.269033                | -2.03101 | 0.843748 |
| 8             | 1             | 0           | 4.145161                | -3.28042 | 0.28402  |
| 9             | 1             | 0           | 5.1565                  | -2.40791 | -0.89181 |
| 10            | 6             | 0           | -2.9518                 | -0.58509 | -0.67774 |
| 11            | 6             | 0           | -2.18352                | -1.47905 | 0.344431 |
| 12            | 5             | 0           | -1.28932                | 0.601354 | 0.293335 |
| 13            | 8             | 0           | -2.0509                 | 0.546219 | -0.84008 |
| 14            | 8             | 0           | -1.46195                | -0.48793 | 1.128575 |
| 15            | 8             | 0           | -0.40229                | 1.553053 | 0.671003 |
| 16            | 6             | 0           | 0.068734                | 2.658182 | -0.14927 |
| 17            | 6             | 0           | 2.41506                 | -1.60157 | -1.84321 |
| 18            | 1             | 0           | 1.924794                | -2.57932 | -1.70254 |
| 19            | 1             | 0           | 1.659243                | -0.91901 | -2.26699 |
| 20            | 1             | 0           | 3.201218                | -1.73673 | -2.60968 |
| 21            | 6             | 0           | -3.17787                | -1.22503 | -2.02884 |
| 22            | 1             | 0           | -3.77098                | -2.14416 | -1.92339 |
| 23            | 1             | 0           | -3.73593                | -0.53626 | -2.67657 |
| 24            | 1             | 0           | -2.23477                | -1.47308 | -2.52882 |
| 25            | 6             | 0           | -4.258                  | -0.03458 | -0.13016 |
| 26            | 1             | 0           | -4.63482                | 0.735438 | -0.81564 |
| 27            | 1             | 0           | -5.02132                | -0.81948 | -0.05005 |
| 28            | 1             | 0           | -4.12782                | 0.425331 | 0.858757 |
| 29            | 6             | 0           | -3.06556                | -2.29101 | 1.264986 |
| 30            | 1             | 0           | -3.69724                | -2.9765  | 0.683046 |
| 31            | 1             | 0           | -2.44418                | -2.8979  | 1.93695  |
| 32            | 1             | 0           | -3.71393                | -1.65609 | 1.879369 |
| 33            | 6             | 0           | -1.13687                | -2.36756 | -0.30809 |
| 34            | 1             | 0           | -0.50588                | -2.81587 | 0.47202  |
| 35            | 1             | 0           | -1.60032                | -3.18459 | -0.87628 |
| 36            | 1             | 0           | -0.4833                 | -1.80001 | -0.98587 |
| 37            | 6             | 0           | 0.640764                | 2.108163 | -1.44444 |
| 38            | 1             | 0           | -0.13625                | 1.655841 | -2.07413 |
| 39            | 1             | 0           | 1.117869                | 2.915921 | -2.01639 |
| 40            | 1             | 0           | 1.404224                | 1.346048 | -1.2255  |
| 41            | 6             | 0           | -1.07556                | 3.624881 | -0.39256 |
| 42            | 1             | 0           | -1.88158                | 3.155782 | -0.97057 |
| 43            | 1             | 0           | -1.48848                | 3.983061 | 0.560677 |
| 44            | 1             | 0           | -0.71506                | 4.495507 | -0.9571  |
| 45            | 6             | 0           | 1.161876                | 3.313897 | 0.674748 |
| 46            | 1             | 0           | 1.998383                | 2.618215 | 0.840619 |
| 47            | 1             | 0           | 1.558607                | 4.193207 | 0.150566 |
| 48            | 1             | 0           | 0.772492                | 3.641528 | 1.648769 |
| 49            | 19            | 0           | 1.04699                 | -0.14519 | 2.322278 |

| IntC          |               |             | Coordinates (Angstroms) |          |          |    |   |   |           |          |          |
|---------------|---------------|-------------|-------------------------|----------|----------|----|---|---|-----------|----------|----------|
| Center Number | Atomic Number | Atomic Type | x                       | y        | z        |    |   |   |           |          |          |
|               |               |             |                         |          |          |    |   |   |           |          |          |
| 1             | 6             | 0           | -6.684033               | -1.85531 | 0.492757 | 36 | 1 | 0 | -1.686321 | -2.52873 | 3.409839 |
| 2             | 6             | 0           | -7.555395               | -0.77231 | 0.590512 | 37 | 1 | 0 | -1.787787 | -0.75717 | 3.280778 |
| 3             | 6             | 0           | -7.136804               | 0.482717 | 0.152301 | 38 | 6 | 0 | -0.160626 | -3.54045 | 0.995285 |
| 4             | 6             | 0           | -5.859057               | 0.652815 | -0.37465 | 39 | 1 | 0 | 0.803838  | -3.86963 | 0.573827 |
| 5             | 6             | 0           | -4.9761                 | -0.42861 | -0.48355 | 40 | 1 | 0 | -0.387217 | -4.20887 | 1.846842 |
| 6             | 6             | 0           | -5.409904               | -1.68296 | -0.04154 | 41 | 1 | 0 | -0.924835 | -3.73427 | 0.223449 |
| 7             | 6             | 0           | -3.611135               | -0.25991 | -1.09601 | 42 | 6 | 0 | 3.737402  | -1.32761 | -1.52628 |
| 8             | 6             | 0           | -2.960697               | 1.08263  | -0.8933  | 43 | 6 | 0 | 4.988784  | -1.04165 | -0.63505 |
| 9             | 6             | 0           | -2.510809               | 1.838741 | -1.97934 | 44 | 8 | 0 | 4.470103  | -0.10407 | 0.347027 |
| 10            | 6             | 0           | -1.872423               | 3.06609  | -1.78574 | 45 | 8 | 0 | 2.99073   | -0.08433 | -1.41573 |
| 11            | 6             | 0           | -1.671328               | 3.550636 | -0.494   | 46 | 6 | 0 | 2.845428  | -2.42835 | -0.97868 |
| 12            | 6             | 0           | -2.114019               | 2.802063 | 0.5989   | 47 | 1 | 0 | 1.912881  | -2.45701 | -1.56003 |
| 13            | 6             | 0           | -2.753157               | 1.580843 | 0.400215 | 48 | 1 | 0 | 3.323334  | -3.41364 | -1.06023 |
| 14            | 6             | 0           | -3.27041                | -1.0528  | -2.32826 | 49 | 1 | 0 | 2.575743  | -2.2527  | 0.072549 |
| 15            | 6             | 0           | -2.716565               | -1.46339 | -1.23339 | 50 | 6 | 0 | 4.050502  | -1.5861  | -2.98333 |
| 16            | 1             | 0           | -6.99487                | -2.84077 | 0.838369 | 51 | 1 | 0 | 4.697311  | -2.46886 | -3.08462 |
| 17            | 1             | 0           | -8.553053               | -0.90464 | 1.007219 | 52 | 1 | 0 | 3.121626  | -1.78688 | -3.53352 |
| 18            | 1             | 0           | -7.808506               | 1.337908 | 0.222183 | 53 | 1 | 0 | 4.549333  | -0.73262 | -3.45634 |
| 19            | 1             | 0           | -5.545164               | 1.642706 | -0.70844 | 54 | 6 | 0 | 6.103666  | -0.32166 | -1.37626 |
| 20            | 1             | 0           | -4.738845               | -2.54048 | -0.11361 | 55 | 1 | 0 | 6.853063  | 0.015739 | -0.64838 |
| 21            | 1             | 0           | -2.664124               | 1.462399 | -2.99266 | 56 | 1 | 0 | 6.602613  | -0.9837  | -2.09591 |
| 22            | 1             | 0           | -1.538048               | 3.644678 | -2.64634 | 57 | 1 | 0 | 5.733572  | 0.561624 | -1.91493 |
| 23            | 1             | 0           | -1.17393                | 4.507121 | -0.33745 | 58 | 6 | 0 | 5.535246  | -2.25091 | 0.089894 |
| 24            | 1             | 0           | -1.955555               | 3.169135 | 1.612474 | 59 | 1 | 0 | 5.849615  | -3.02128 | -0.6281  |
| 25            | 1             | 0           | -3.092667               | 0.99917  | 1.258826 | 60 | 1 | 0 | 6.41444   | -1.9625  | 0.680947 |
| 26            | 1             | 0           | -3.473189               | -1.15698 | -3.38812 | 61 | 1 | 0 | 4.796356  | -2.68827 | 0.771363 |
| 27            | 19            | 0           | 0.292352                | 0.684449 | -0.82932 | 62 | 8 | 0 | 2.687918  | 1.572183 | 0.215017 |
| 28            | 1             | 0           | -2.095203               | -2.15514 | -0.67282 | 63 | 6 | 0 | 2.96598   | 2.341048 | 1.415836 |
| 29            | 14            | 0           | -0.090294               | -1.67862 | 1.586489 | 64 | 6 | 0 | 1.840611  | 3.3567   | 1.485377 |
| 30            | 6             | 0           | 1.231629                | -1.91332 | 2.999119 | 65 | 1 | 0 | 1.823433  | 3.981382 | 0.581331 |
| 31            | 1             | 0           | 1.212602                | -1.07215 | 3.711857 | 66 | 1 | 0 | 0.869425  | 2.847812 | 1.584115 |
| 32            | 1             | 0           | 1.038979                | -2.83554 | 3.578935 | 67 | 1 | 0 | 1.967085  | 4.012585 | 2.356723 |
| 33            | 1             | 0           | 2.262649                | -1.97654 | 2.609527 | 68 | 6 | 0 | 2.928821  | 1.426336 | 2.626842 |
| 34            | 6             | 0           | -1.692562               | -1.68559 | 2.69356  | 69 | 1 | 0 | 3.738185  | 0.686037 | 2.60316  |
| 35            | 1             | 0           | -2.61264                | -1.77844 | 2.091065 | 70 | 1 | 0 | 3.033219  | 2.019922 | 3.545452 |
|               |               |             |                         |          |          | 71 | 1 | 0 | 1.968659  | 0.891727 | 2.669353 |
|               |               |             |                         |          |          | 72 | 6 | 0 | 4.309316  | 3.031818 | 1.262505 |
|               |               |             |                         |          |          | 73 | 1 | 0 | 4.502985  | 3.673273 | 2.132975 |
|               |               |             |                         |          |          | 74 | 1 | 0 | 5.128363  | 2.304514 | 1.189472 |
|               |               |             |                         |          |          | 75 | 1 | 0 | 4.318843  | 3.663598 | 0.363398 |
|               |               |             |                         |          |          | 76 | 5 | 0 | 3.391812  | 0.504448 | -0.23221 |

| TSCD          |               |             | Coordinates (Angstroms) |          |          |    |   |   |          |          |          |
|---------------|---------------|-------------|-------------------------|----------|----------|----|---|---|----------|----------|----------|
| Center Number | Atomic Number | Atomic Type | Coordinates (Angstroms) |          |          |    |   |   |          |          |          |
|               |               |             | x                       | y        | z        |    |   |   |          |          |          |
| 1             | 6             | 0           | -6.63694                | -2.14793 | -0.50193 | 36 | 1 | 0 | -1.80158 | -1.24769 | 4.185364 |
| 2             | 6             | 0           | -7.52995                | -1.08315 | -0.38464 | 37 | 1 | 0 | -2.00891 | 0.368499 | 3.485049 |
| 3             | 6             | 0           | -7.03273                | 0.217082 | -0.35766 | 38 | 6 | 0 | -0.28108 | -2.96383 | 2.292409 |
| 4             | 6             | 0           | -5.66132                | 0.451168 | -0.44244 | 39 | 1 | 0 | 0.665853 | -3.32465 | 1.860288 |
| 5             | 6             | 0           | -4.75026                | -0.60834 | -0.55757 | 40 | 1 | 0 | -0.2516  | -3.18393 | 3.374562 |
| 6             | 6             | 0           | -5.269                  | -1.91241 | -0.59041 | 41 | 1 | 0 | -1.08719 | -3.57845 | 1.859875 |
| 7             | 6             | 0           | -3.26761                | -0.38168 | -0.65245 | 42 | 6 | 0 | 3.530381 | -1.92765 | -1.03865 |
| 8             | 6             | 0           | -2.81951                | 1.054604 | -0.59665 | 43 | 6 | 0 | 4.927286 | -1.34389 | -0.65932 |
| 9             | 6             | 0           | -2.54775                | 1.749545 | -1.77937 | 44 | 8 | 0 | 4.573549 | -0.15937 | 0.108156 |
| 10            | 6             | 0           | -2.062                  | 3.058102 | -1.74958 | 45 | 8 | 0 | 2.716273 | -0.72654 | -1.12368 |
| 11            | 6             | 0           | -1.84595                | 3.691146 | -0.52473 | 46 | 6 | 0 | 2.920665 | -2.79488 | 0.049694 |
| 12            | 6             | 0           | -2.1365                 | 3.017024 | 0.661328 | 47 | 1 | 0 | 1.86869  | -2.98995 | -0.2014  |
| 13            | 6             | 0           | -2.62428                | 1.710691 | 0.623308 | 48 | 1 | 0 | 3.435349 | -3.76127 | 0.131181 |
| 14            | 6             | 0           | -2.41985                | -1.34581 | -1.42945 | 49 | 1 | 0 | 2.949687 | -2.3026  | 1.032101 |
| 15            | 6             | 0           | -2.36936                | -1.47095 | -0.10772 | 50 | 6 | 0 | 3.485981 | -2.64626 | -2.36806 |
| 16            | 1             | 0           | -7.00838                | -3.17223 | -0.52663 | 51 | 1 | 0 | 4.173914 | -3.50314 | -2.36346 |
| 17            | 1             | 0           | -8.60164                | -1.26635 | -0.31771 | 52 | 1 | 0 | 2.473451 | -3.03082 | -2.54926 |
| 18            | 1             | 0           | -7.71585                | 1.061757 | -0.27003 | 53 | 1 | 0 | 3.75563  | -1.98737 | -3.20127 |
| 19            | 1             | 0           | -5.29732                | 1.478375 | -0.4198  | 54 | 6 | 0 | 5.723179 | -0.86034 | -1.86083 |
| 20            | 1             | 0           | -4.58941                | -2.75884 | -0.69101 | 55 | 1 | 0 | 6.588677 | -0.28599 | -1.50524 |
| 21            | 1             | 0           | -2.70391                | 1.245599 | -2.73593 | 56 | 1 | 0 | 6.095997 | -1.70009 | -2.46164 |
| 22            | 1             | 0           | -1.85295                | 3.582658 | -2.68168 | 57 | 1 | 0 | 5.126418 | -0.20591 | -2.51146 |
| 23            | 1             | 0           | -1.45617                | 4.708261 | -0.4946  | 58 | 6 | 0 | 5.775641 | -2.25125 | 0.20202  |
| 24            | 1             | 0           | -1.97254                | 3.50621  | 1.621521 | 59 | 1 | 0 | 5.974252 | -3.19801 | -0.31943 |
| 25            | 1             | 0           | -2.85467                | 1.184514 | 1.549708 | 60 | 1 | 0 | 6.74123  | -1.77126 | 0.40847  |
| 26            | 1             | 0           | -2.45288                | -1.91904 | -2.35153 | 61 | 1 | 0 | 5.295201 | -2.47495 | 1.161122 |
| 27            | 19            | 0           | 0.186008                | 0.415423 | -0.93318 | 62 | 8 | 0 | 2.647811 | 1.352275 | -0.04787 |
| 28            | 1             | 0           | -2.49584                | -2.22455 | 0.666304 | 63 | 6 | 0 | 3.179207 | 2.549026 | 0.580056 |
| 29            | 14            | 0           | -0.52598                | -1.06712 | 1.994213 | 64 | 6 | 0 | 1.986521 | 3.480914 | 0.688144 |
| 30            | 6             | 0           | 0.973877                | -0.3629  | 3.008346 | 65 | 1 | 0 | 1.570133 | 3.695989 | -0.30685 |
| 31            | 1             | 0           | 0.897861                | 0.732063 | 3.113885 | 66 | 1 | 0 | 1.199779 | 3.028864 | 1.310838 |
| 32            | 1             | 0           | 1.011913                | -0.79075 | 4.027593 | 67 | 1 | 0 | 2.280963 | 4.433246 | 1.148528 |
| 33            | 1             | 0           | 1.941565                | -0.57802 | 2.523643 | 68 | 6 | 0 | 3.727389 | 2.219059 | 1.956602 |
| 34            | 6             | 0           | -1.96116                | -0.70434 | 3.237129 | 69 | 1 | 0 | 4.588341 | 1.542016 | 1.898216 |
| 35            | 1             | 0           | -2.95444                | -0.99662 | 2.856796 | 70 | 1 | 0 | 4.050795 | 3.142791 | 2.455605 |
|               |               |             |                         |          |          | 71 | 1 | 0 | 2.953619 | 1.748097 | 2.578445 |
|               |               |             |                         |          |          | 72 | 6 | 0 | 4.248772 | 3.135039 | -0.32546 |
|               |               |             |                         |          |          | 73 | 1 | 0 | 4.623502 | 4.078642 | 0.093786 |
|               |               |             |                         |          |          | 74 | 1 | 0 | 5.101545 | 2.450315 | -0.43162 |
|               |               |             |                         |          |          | 75 | 1 | 0 | 3.839476 | 3.342999 | -1.32384 |
|               |               |             |                         |          |          | 76 | 5 | 0 | 3.329586 | 0.214087 | -0.31856 |

**IntD**

| Center Number | Atomic Number | Atomic Type | Coordinates (Angstroms) |          |          |  |  |  |  |  |  |
|---------------|---------------|-------------|-------------------------|----------|----------|--|--|--|--|--|--|
|               |               |             | x                       | y        | z        |  |  |  |  |  |  |
| 1             | 6             | 0           | 6.686325                | 1.208826 | -1.0436  |  |  |  |  |  |  |
| 2             | 6             | 0           | 7.343877                | -0.02092 | -1.12813 |  |  |  |  |  |  |
| 3             | 6             | 0           | 6.611651                | -1.18195 | -0.90712 |  |  |  |  |  |  |
| 4             | 6             | 0           | 5.251012                | -1.11778 | -0.60281 |  |  |  |  |  |  |
| 5             | 6             | 0           | 4.569189                | 0.107683 | -0.51154 |  |  |  |  |  |  |
| 6             | 6             | 0           | 5.330509                | 1.269021 | -0.74889 |  |  |  |  |  |  |
| 7             | 6             | 0           | 3.098653                | 0.177729 | -0.22625 |  |  |  |  |  |  |
| 8             | 6             | 0           | 2.468235                | -1.15801 | 0.054078 |  |  |  |  |  |  |
| 9             | 6             | 0           | 1.900911                | -1.9127  | -0.97823 |  |  |  |  |  |  |
| 10            | 6             | 0           | 1.301705                | -3.14657 | -0.73096 |  |  |  |  |  |  |
| 11            | 6             | 0           | 1.267589                | -3.65709 | 0.56754  |  |  |  |  |  |  |
| 12            | 6             | 0           | 1.866044                | -2.93757 | 1.600896 |  |  |  |  |  |  |
| 13            | 6             | 0           | 2.467721                | -1.70738 | 1.339089 |  |  |  |  |  |  |
| 14            | 6             | 0           | 2.238068                | 1.237099 | -0.92119 |  |  |  |  |  |  |
| 15            | 6             | 0           | 2.61075                 | 1.38281  | 0.556153 |  |  |  |  |  |  |
| 16            | 1             | 0           | 7.236835                | 2.134555 | -1.21354 |  |  |  |  |  |  |
| 17            | 1             | 0           | 8.40657                 | -0.06785 | -1.36336 |  |  |  |  |  |  |
| 18            | 1             | 0           | 7.09779                 | -2.15607 | -0.96833 |  |  |  |  |  |  |
| 19            | 1             | 0           | 4.713321                | -2.05007 | -0.43088 |  |  |  |  |  |  |
| 20            | 1             | 0           | 4.850325                | 2.246911 | -0.70423 |  |  |  |  |  |  |
| 21            | 1             | 0           | 1.962137                | -1.52733 | -1.99965 |  |  |  |  |  |  |
| 22            | 1             | 0           | 0.866041                | -3.71552 | -1.55304 |  |  |  |  |  |  |
| 23            | 1             | 0           | 0.787763                | -4.61469 | 0.769003 |  |  |  |  |  |  |
| 24            | 1             | 0           | 1.865235                | -3.33617 | 2.615695 |  |  |  |  |  |  |
| 25            | 1             | 0           | 2.950628                | -1.15341 | 2.146486 |  |  |  |  |  |  |
| 26            | 1             | 0           | 2.905567                | 1.868553 | -1.5347  |  |  |  |  |  |  |
| 27            | 1             | 0           | 3.435537                | 2.063983 | 0.832421 |  |  |  |  |  |  |
| 28            | 14            | 0           | 1.265529                | 1.510745 | 1.848058 |  |  |  |  |  |  |
| 29            | 6             | 0           | -0.3314                 | 0.55831  | 1.497988 |  |  |  |  |  |  |
| 30            | 1             | 0           | -0.171078               | -0.50081 | 1.242875 |  |  |  |  |  |  |
| 31            | 1             | 0           | -0.948944               | 0.584801 | 2.410629 |  |  |  |  |  |  |
| 32            | 1             | 0           | -0.933269               | 1.032479 | 0.708804 |  |  |  |  |  |  |
| 33            | 6             | 0           | 1.826171                | 1.039243 | 3.594134 |  |  |  |  |  |  |
| 34            | 1             | 0           | 2.870419                | 1.335171 | 3.774843 |  |  |  |  |  |  |
| 35            | 1             | 0           | 1.203261                | 1.551186 | 4.343806 |  |  |  |  |  |  |
| 36            | 1             | 0           | 1.74653                 | -0.04057 | 3.785637 |  |  |  |  |  |  |
| 37            | 6             | 0           | 0.812062                | 3.344165 | 1.905217 |  |  |  |  |  |  |
| 38            | 1             | 0           | 0.514603                | 3.712351 | 0.911559 |  |  |  |  |  |  |
| 39            | 1             | 0           | -0.014626               | 3.539392 | 2.605131 |  |  |  |  |  |  |
| 40            | 1             | 0           | 1.672118                | 3.94749  | 2.233742 |  |  |  |  |  |  |
| 41            | 6             | 0           | -3.536952               | -2.02787 | -0.40414 |  |  |  |  |  |  |
| 42            | 6             | 0           | -4.495063               | -1.29417 | 0.586435 |  |  |  |  |  |  |
| 43            | 8             | 0           | -4.539356               | 0.05289  | 0.037851 |  |  |  |  |  |  |
| 44            | 8             | 0           | -2.66287                | -0.94943 | -0.83538 |  |  |  |  |  |  |
| 45            | 6             | 0           | -4.241132               | -2.55074 | -1.64474 |  |  |  |  |  |  |
| 46            | 1             | 0           | -3.486841               | -2.86733 | -2.37689 |  |  |  |  |  |  |
| 47            | 1             | 0           | -4.870502               | -3.41927 | -1.41106 |  |  |  |  |  |  |
| 48            | 1             | 0           | -4.870233               | -1.78248 | -2.11405 |  |  |  |  |  |  |
| 49            | 6             | 0           | -2.697289               | -3.11848 | 0.22261  |  |  |  |  |  |  |
| 50            | 1             | 0           | -3.341698               | -3.89071 | 0.665785 |  |  |  |  |  |  |
| 51            | 1             | 0           | -2.079313               | -3.5998  | -0.54712 |  |  |  |  |  |  |
| 52            | 1             | 0           | -2.031287               | -2.72988 | 1.002413 |  |  |  |  |  |  |
| 53            | 6             | 0           | -3.925887               | -1.16973 | 1.990408 |  |  |  |  |  |  |
| 54            | 1             | 0           | -4.552952               | -0.47776 | 2.567982 |  |  |  |  |  |  |
| 55            | 1             | 0           | -3.917856               | -2.13658 | 2.510233 |  |  |  |  |  |  |
| 56            | 1             | 0           | -2.900737               | -0.77237 | 1.981914 |  |  |  |  |  |  |
| 57            | 6             | 0           | -5.899359               | -1.85132 | 0.636596 |  |  |  |  |  |  |
| 58            | 1             | 0           | -5.883225               | -2.90145 | 0.959968 |  |  |  |  |  |  |
| 59            | 1             | 0           | -6.497163               | -1.28499 | 1.362699 |  |  |  |  |  |  |
| 60            | 1             | 0           | -6.400801               | -1.7934  | -0.33604 |  |  |  |  |  |  |
| 61            | 8             | 0           | -2.807207               | 1.375168 | -1.08759 |  |  |  |  |  |  |
| 62            | 6             | 0           | -3.276084               | 2.723253 | -0.80753 |  |  |  |  |  |  |
| 63            | 6             | 0           | -2.252536               | 3.626983 | -1.46893 |  |  |  |  |  |  |
| 64            | 1             | 0           | -1.250643               | 3.456778 | -1.04687 |  |  |  |  |  |  |
| 65            | 1             | 0           | -2.213088               | 3.443844 | -2.55186 |  |  |  |  |  |  |
| 66            | 1             | 0           | -2.510887               | 4.681926 | -1.30869 |  |  |  |  |  |  |
| 67            | 6             | 0           | -4.647903               | 2.913008 | -1.42928 |  |  |  |  |  |  |
| 68            | 1             | 0           | -5.396982               | 2.264782 | -0.95707 |  |  |  |  |  |  |
| 69            | 1             | 0           | -4.973245               | 3.954861 | -1.3058  |  |  |  |  |  |  |
| 70            | 1             | 0           | -4.618114               | 2.69051  | -2.50482 |  |  |  |  |  |  |
| 71            | 6             | 0           | -3.302493               | 2.95292  | 0.694464 |  |  |  |  |  |  |
| 72            | 1             | 0           | -3.627808               | 3.980557 | 0.905894 |  |  |  |  |  |  |
| 73            | 1             | 0           | -3.996874               | 2.266607 | 1.1971   |  |  |  |  |  |  |
| 74            | 1             | 0           | -2.301319               | 2.820903 | 1.129046 |  |  |  |  |  |  |
| 75            | 5             | 0           | -3.359016               | 0.225264 | -0.63011 |  |  |  |  |  |  |
| 76            | 19            | 0           | -0.337279               | 0.263289 | -1.80161 |  |  |  |  |  |  |

| TS <sub>DE</sub> |               |             |                         |          |          |   |   |   |    |    |   |           |          |          |
|------------------|---------------|-------------|-------------------------|----------|----------|---|---|---|----|----|---|-----------|----------|----------|
| Center Number    | Atomic Number | Atomic Type | Coordinates (Angstroms) |          |          | x | y | z |    |    |   |           |          |          |
|                  |               |             | x                       | y        | z        |   |   |   |    |    |   |           |          |          |
| 1                | 6             | 0           | 6.78688                 | 0.99306  | -0.89901 |   |   |   | 36 | 1  | 0 | 1.94636   | 0.033554 | 3.757821 |
| 2                | 6             | 0           | 7.44874                 | -0.15695 | -0.46344 |   |   |   | 37 | 6  | 0 | 1.033729  | 3.465129 | 1.876096 |
| 3                | 6             | 0           | 6.699933                | -1.22457 | 0.024674 |   |   |   | 38 | 1  | 0 | 0.71415   | 3.821295 | 0.884462 |
| 4                | 6             | 0           | 5.307409                | -1.14258 | 0.077217 |   |   |   | 39 | 1  | 0 | 0.268413  | 3.766406 | 2.607749 |
| 5                | 6             | 0           | 4.629592                | -0.00051 | -0.3671  |   |   |   | 40 | 1  | 0 | 1.965167  | 3.994103 | 2.128458 |
| 6                | 6             | 0           | 5.398677                | 1.062163 | -0.85525 |   |   |   | 41 | 6  | 0 | -3.732543 | -1.8785  | 0.198016 |
| 7                | 6             | 0           | 3.115609                | 0.119281 | -0.2963  |   |   |   | 42 | 6  | 0 | -4.737202 | -0.83985 | 0.789698 |
| 8                | 6             | 0           | 2.411289                | -1.20823 | -0.2348  |   |   |   | 43 | 8  | 0 | -4.566282 | 0.301305 | -0.09742 |
| 9                | 6             | 0           | 2.381856                | -1.9954  | -1.40357 |   |   |   | 44 | 8  | 0 | -2.700648 | -1.01791 | -0.35635 |
| 10               | 6             | 0           | 1.639148                | -3.16885 | -1.47382 |   |   |   | 45 | 6  | 0 | -4.305997 | -2.68213 | -0.95666 |
| 11               | 6             | 0           | 0.899056                | -3.59972 | -0.36621 |   |   |   | 46 | 1  | 0 | -3.492287 | -3.23649 | -1.44314 |
| 12               | 6             | 0           | 0.960443                | -2.86328 | 0.81538  |   |   |   | 47 | 1  | 0 | -5.049411 | -3.41028 | -0.60733 |
| 13               | 6             | 0           | 1.72892                 | -1.69828 | 0.885429 |   |   |   | 48 | 1  | 0 | -4.778416 | -2.03814 | -1.71048 |
| 14               | 6             | 0           | 2.40576                 | 1.23497  | -0.91222 |   |   |   | 49 | 6  | 0 | -3.107572 | -2.80203 | 1.219675 |
| 15               | 6             | 0           | 2.597237                | 1.337765 | 0.53146  |   |   |   | 50 | 1  | 0 | -3.885714 | -3.38176 | 1.735771 |
| 16               | 1             | 0           | 7.359627                | 1.839256 | -1.28044 |   |   |   | 51 | 1  | 0 | -2.438057 | -3.51424 | 0.718882 |
| 17               | 1             | 0           | 8.53596                 | -0.21863 | -0.50645 |   |   |   | 52 | 1  | 0 | -2.527002 | -2.25445 | 1.971243 |
| 18               | 1             | 0           | 7.199764                | -2.13093 | 0.367892 |   |   |   | 53 | 6  | 0 | -4.35734  | -0.3628  | 2.182201 |
| 19               | 1             | 0           | 4.741555                | -1.9876  | 0.47312  |   |   |   | 54 | 1  | 0 | -4.985787 | 0.497895 | 2.446373 |
| 20               | 1             | 0           | 4.864732                | 1.944319 | -1.21906 |   |   |   | 55 | 1  | 0 | -4.517684 | -1.14526 | 2.935252 |
| 21               | 1             | 0           | 2.938366                | -1.65186 | -2.2792  |   |   |   | 56 | 1  | 0 | -3.306519 | -0.0426  | 2.23213  |
| 22               | 1             | 0           | 1.629013                | -3.74973 | -2.39632 |   |   |   | 57 | 6  | 0 | -6.184309 | -1.27482 | 0.758383 |
| 23               | 1             | 0           | 0.305532                | -4.51173 | -0.41946 |   |   |   | 58 | 1  | 0 | -6.320857 | -2.19206 | 1.348025 |
| 24               | 1             | 0           | 0.418978                | -3.20368 | 1.699069 |   |   |   | 59 | 1  | 0 | -6.81689  | -0.49357 | 1.199684 |
| 25               | 1             | 0           | 1.797662                | -1.1614  | 1.831258 |   |   |   | 60 | 1  | 0 | -6.535611 | -1.46117 | -0.26279 |
| 26               | 1             | 0           | 1.90142                 | 1.602426 | -1.7956  |   |   |   | 61 | 8  | 0 | -2.571293 | 1.140601 | -1.25338 |
| 27               | 1             | 0           | 3.473251                | 1.943077 | 0.897984 |   |   |   | 62 | 6  | 0 | -2.910768 | 2.546987 | -1.40971 |
| 28               | 14            | 0           | 1.295785                | 1.592913 | 1.868356 |   |   |   | 63 | 6  | 0 | -1.703154 | 3.15611  | -2.09763 |
| 29               | 6             | 0           | -0.432506               | 0.861371 | 1.619347 |   |   |   | 64 | 1  | 0 | -0.799624 | 3.03951  | -1.48023 |
| 30               | 1             | 0           | -0.478764               | -0.23677 | 1.642065 |   |   |   | 65 | 1  | 0 | -1.527494 | 2.678328 | -3.07204 |
| 31               | 1             | 0           | -1.066235               | 1.228975 | 2.442734 |   |   |   | 66 | 1  | 0 | -1.859091 | 4.229463 | -2.26727 |
| 32               | 1             | 0           | -0.903769               | 1.223158 | 0.693054 |   |   |   | 67 | 6  | 0 | -4.14759  | 2.662818 | -2.2818  |
| 33               | 6             | 0           | 1.910501                | 1.11993  | 3.591597 |   |   |   | 68 | 1  | 0 | -5.02522  | 2.218677 | -1.7949  |
| 34               | 1             | 0           | 2.926582                | 1.511023 | 3.752258 |   |   |   | 69 | 1  | 0 | -4.367599 | 3.720373 | -2.48087 |
| 35               | 1             | 0           | 1.263206                | 1.553625 | 4.369151 |   |   |   | 70 | 1  | 0 | -3.988109 | 2.16033  | -3.24574 |
|                  |               |             |                         |          |          |   |   |   | 71 | 6  | 0 | -3.125234 | 3.178136 | -0.0438  |
|                  |               |             |                         |          |          |   |   |   | 72 | 1  | 0 | -3.338231 | 4.249117 | -0.16291 |
|                  |               |             |                         |          |          |   |   |   | 73 | 1  | 0 | -3.971967 | 2.721235 | 0.485119 |
|                  |               |             |                         |          |          |   |   |   | 74 | 1  | 0 | -2.226092 | 3.082034 | 0.581953 |
|                  |               |             |                         |          |          |   |   |   | 75 | 5  | 0 | -3.295139 | 0.2069   | -0.58946 |
|                  |               |             |                         |          |          |   |   |   | 76 | 19 | 0 | -0.245589 | -0.35782 | -1.44089 |



**IntE**

| Center Number | Atomic Number | Atomic Type | Coordinates (Angstroms) |          |          |    |    |   |           |          |          |
|---------------|---------------|-------------|-------------------------|----------|----------|----|----|---|-----------|----------|----------|
|               |               |             | x                       | y        | z        |    |    |   |           |          |          |
| 1             | 6             | 0           | 6.833943                | 0.941592 | -0.80977 | 36 | 1  | 0 | 1.756086  | 0.096956 | 3.797166 |
| 2             | 6             | 0           | 7.460142                | -0.2458  | -0.42994 | 37 | 6  | 0 | 1.080523  | 3.543929 | 1.82106  |
| 3             | 6             | 0           | 6.678357                | -1.30611 | 0.023054 | 38 | 1  | 0 | 0.847287  | 3.875873 | 0.797571 |
| 4             | 6             | 0           | 5.291662                | -1.17931 | 0.093315 | 39 | 1  | 0 | 0.261836  | 3.870812 | 2.480071 |
| 5             | 6             | 0           | 4.64637                 | 0.004294 | -0.29275 | 40 | 1  | 0 | 1.994708  | 4.069159 | 2.1351   |
| 6             | 6             | 0           | 5.449296                | 1.061818 | -0.74229 | 41 | 6  | 0 | -3.784109 | -1.83591 | 0.348159 |
| 7             | 6             | 0           | 3.15543                 | 0.165462 | -0.16966 | 42 | 6  | 0 | -4.696123 | -0.71361 | 0.939799 |
| 8             | 6             | 0           | 2.405077                | -1.12536 | -0.20051 | 43 | 8  | 0 | -4.524514 | 0.36906  | -0.01872 |
| 9             | 6             | 0           | 2.415197                | -1.87378 | -1.39454 | 44 | 8  | 0 | -2.752992 | -1.0642  | -0.32693 |
| 10            | 6             | 0           | 1.70119                 | -3.06285 | -1.51402 | 45 | 6  | 0 | -4.473971 | -2.6755  | -0.71315 |
| 11            | 6             | 0           | 0.943583                | -3.53946 | -0.43858 | 46 | 1  | 0 | -3.726042 | -3.30557 | -1.21264 |
| 12            | 6             | 0           | 0.945126                | -2.82663 | 0.759286 | 47 | 1  | 0 | -5.230409 | -3.3366  | -0.2709  |
| 13            | 6             | 0           | 1.683606                | -1.64689 | 0.878775 | 48 | 1  | 0 | -4.960594 | -2.05308 | -1.476   |
| 14            | 6             | 0           | 2.50168                 | 1.380558 | -0.84917 | 49 | 6  | 0 | -3.127996 | -2.72659 | 1.379471 |
| 15            | 6             | 0           | 2.702968                | 1.344892 | 0.672229 | 50 | 1  | 0 | -3.89019  | -3.24538 | 1.977484 |
| 16            | 1             | 0           | 7.430107                | 1.782133 | -1.16643 | 51 | 1  | 0 | -2.518897 | -3.49078 | 0.877598 |
| 17            | 1             | 0           | 8.544212                | -0.3419  | -0.48489 | 52 | 1  | 0 | -2.478628 | -2.16144 | 2.05836  |
| 18            | 1             | 0           | 7.148427                | -2.24168 | 0.327277 | 53 | 6  | 0 | -4.208981 | -0.18483 | 2.278877 |
| 19            | 1             | 0           | 4.702808                | -2.02174 | 0.459508 | 54 | 1  | 0 | -4.773192 | 0.723472 | 2.528072 |
| 20            | 1             | 0           | 4.956725                | 1.983309 | -1.05515 | 55 | 1  | 0 | -4.367351 | -0.91526 | 3.082866 |
| 21            | 1             | 0           | 2.993366                | -1.4981  | -2.24161 | 56 | 1  | 0 | -3.141568 | 0.076878 | 2.252671 |
| 22            | 1             | 0           | 1.729669                | -3.6197  | -2.45079 | 57 | 6  | 0 | -6.162895 | -1.0698  | 1.018779 |
| 23            | 1             | 0           | 0.375804                | -4.46476 | -0.5301  | 58 | 1  | 0 | -6.310297 | -1.944   | 1.668095 |
| 24            | 1             | 0           | 0.382454                | -3.19796 | 1.616347 | 59 | 1  | 0 | -6.724243 | -0.23125 | 1.451054 |
| 25            | 1             | 0           | 1.708351                | -1.12851 | 1.836931 | 60 | 1  | 0 | -6.586769 | -1.29122 | 0.032879 |
| 26            | 1             | 0           | 1.433329                | 1.119317 | -1.02322 | 61 | 8  | 0 | -2.571311 | 1.028534 | -1.35333 |
| 27            | 1             | 0           | 3.568024                | 1.939308 | 1.017179 | 62 | 6  | 0 | -2.853296 | 2.435493 | -1.60363 |
| 28            | 14            | 0           | 1.30818                 | 1.671475 | 1.87045  | 63 | 6  | 0 | -1.643366 | 2.934224 | -2.37138 |
| 29            | 6             | 0           | -0.381309               | 0.952856 | 1.418155 | 64 | 1  | 0 | -0.724639 | 2.821167 | -1.77563 |
| 30            | 1             | 0           | -0.442174               | -0.14266 | 1.484457 | 65 | 1  | 0 | -1.523283 | 2.380537 | -3.31363 |
| 31            | 1             | 0           | -1.122107               | 1.363783 | 2.123033 | 66 | 1  | 0 | -1.755904 | 3.998688 | -2.61496 |
| 32            | 1             | 0           | -0.702776               | 1.274681 | 0.415883 | 67 | 6  | 0 | -4.113409 | 2.538309 | -2.44333 |
| 33            | 6             | 0           | 1.705074                | 1.185483 | 3.650471 | 68 | 1  | 0 | -4.991055 | 2.169613 | -1.89658 |
| 34            | 1             | 0           | 2.674944                | 1.604298 | 3.956983 | 69 | 1  | 0 | -4.297961 | 3.586231 | -2.71546 |
| 35            | 1             | 0           | 0.942061                | 1.579025 | 4.339436 | 70 | 1  | 0 | -4.00772  | 1.958598 | -3.3706  |
|               |               |             |                         |          |          | 71 | 6  | 0 | -2.995019 | 3.177243 | -0.28496 |
|               |               |             |                         |          |          | 72 | 1  | 0 | -3.187251 | 4.240497 | -0.48234 |
|               |               |             |                         |          |          | 73 | 1  | 0 | -3.829131 | 2.787232 | 0.313043 |
|               |               |             |                         |          |          | 74 | 1  | 0 | -2.072627 | 3.108253 | 0.308733 |
|               |               |             |                         |          |          | 75 | 5  | 0 | -3.29828  | 0.17967  | -0.58743 |
|               |               |             |                         |          |          | 76 | 19 | 0 | -0.424761 | -0.66667 | -1.63457 |

| IntF          |               |             |                         |          |          | 36 | 6  | 0 | -6.468822 | -0.84399 | -0.5594  |
|---------------|---------------|-------------|-------------------------|----------|----------|----|----|---|-----------|----------|----------|
| Center Number | Atomic Number | Atomic Type | Coordinates (Angstroms) |          |          | 37 | 1  | 0 | -5.993542 | 0.00116  | -2.48865 |
|               |               |             | x                       | y        | z        | 38 | 1  | 0 | -6.639444 | -1.59651 | 1.453877 |
| 1             | 6             | 0           | -2.403739               | 0.168459 | 0.51111  | 39 | 1  | 0 | -1.50511  | 5.500398 | 0.838122 |
| 2             | 6             | 0           | -1.265597               | -0.66641 | -0.01467 | 40 | 1  | 0 | -7.49083  | -1.10483 | -0.83289 |
| 3             | 6             | 0           | -2.192116               | 1.661803 | 0.549707 | 41 | 19 | 0 | 0.57084   | 1.162634 | 1.949063 |
| 4             | 14            | 0           | -1.369051               | -2.20826 | -1.05453 | 42 | 8  | 0 | 2.643577  | -0.62198 | 1.407097 |
| 5             | 6             | 0           | -1.580942               | -0.63661 | 1.497469 | 43 | 8  | 0 | 2.296542  | 1.00655  | -0.24132 |
| 6             | 1             | 0           | -0.377563               | -0.08537 | -0.33277 | 44 | 6  | 0 | 3.38275   | -1.62281 | 2.157881 |
| 7             | 6             | 0           | -3.817735               | -0.19078 | 0.140331 | 45 | 5  | 0 | 2.985301  | -0.10629 | 0.203824 |
| 8             | 6             | 0           | -1.537947               | 2.355682 | -0.47395 | 46 | 6  | 0 | 2.693685  | 1.203905 | -1.62512 |
| 9             | 6             | 0           | -2.619617               | 2.391649 | 1.668376 | 47 | 6  | 0 | 2.535305  | -1.87716 | 3.390282 |
| 10            | 6             | 0           | -1.472224               | -1.82771 | -2.90488 | 48 | 6  | 0 | 3.528256  | -2.89325 | 1.339738 |
| 11            | 6             | 0           | 0.243504                | -3.13133 | -0.71464 | 49 | 6  | 0 | 4.734949  | -1.04141 | 2.533837 |
| 12            | 6             | 0           | -2.786956               | -3.37432 | -0.6287  | 50 | 8  | 0 | 3.953084  | -0.53082 | -0.66488 |
| 13            | 1             | 0           | -2.135331               | -1.55803 | 1.756318 | 51 | 6  | 0 | 2.699303  | 2.684967 | -1.92773 |
| 14            | 6             | 0           | -4.323263               | 0.104939 | -1.13332 | 52 | 6  | 0 | 1.665308  | 0.49373  | -2.48951 |
| 15            | 6             | 0           | -4.677806               | -0.79412 | 1.062699 | 53 | 6  | 0 | 4.097304  | 0.523074 | -1.65663 |
| 16            | 6             | 0           | -1.287306               | 3.726798 | -0.37222 | 54 | 1  | 0 | 1.537282  | -2.23851 | 3.103574 |
| 17            | 1             | 0           | -1.209361               | 1.810042 | -1.36177 | 55 | 1  | 0 | 2.418117  | -0.95713 | 3.981757 |
| 18            | 6             | 0           | -2.381987               | 3.75882  | 1.773185 | 56 | 1  | 0 | 3.006789  | -2.63364 | 4.031392 |
| 19            | 1             | 0           | -3.125783               | 1.859331 | 2.476747 | 57 | 1  | 0 | 4.029913  | -3.66248 | 1.942648 |
| 20            | 1             | 0           | -0.741251               | -1.0615  | -3.20572 | 58 | 1  | 0 | 2.543469  | -3.28085 | 1.045553 |
| 21            | 1             | 0           | -1.275671               | -2.72794 | -3.50739 | 59 | 1  | 0 | 4.124233  | -2.72619 | 0.434267 |
| 22            | 1             | 0           | -2.471506               | -1.45896 | -3.18048 | 60 | 1  | 0 | 5.288585  | -1.75002 | 3.1647   |
| 23            | 1             | 0           | 1.123793                | -2.51683 | -0.96387 | 61 | 1  | 0 | 4.611755  | -0.10666 | 3.098582 |
| 24            | 1             | 0           | 0.322542                | -4.07303 | -1.27839 | 62 | 1  | 0 | 5.343979  | -0.83506 | 1.642719 |
| 25            | 1             | 0           | 0.302481                | -3.37203 | 0.358817 | 63 | 1  | 0 | 1.672459  | 3.073983 | -1.89397 |
| 26            | 1             | 0           | -2.658565               | -4.31206 | -1.19165 | 64 | 1  | 0 | 3.094709  | 2.868933 | -2.93641 |
| 27            | 1             | 0           | -2.808553               | -3.63173 | 0.440027 | 65 | 1  | 0 | 3.302556  | 3.250345 | -1.2082  |
| 28            | 1             | 0           | -3.768743               | -2.95841 | -0.89679 | 66 | 1  | 0 | 0.668433  | 0.896221 | -2.26085 |
| 29            | 6             | 0           | -5.628842               | -0.22387 | -1.48622 | 67 | 1  | 0 | 1.64677   | -0.58838 | -2.29733 |
| 30            | 1             | 0           | -3.671076               | 0.589835 | -1.86329 | 68 | 1  | 0 | 1.859813  | 0.653219 | -3.55829 |
| 31            | 6             | 0           | -5.989853               | -1.12102 | 0.718792 | 69 | 6  | 0 | 4.467865  | -0.0994  | -2.98342 |
| 32            | 1             | 0           | -4.306581               | -1.02071 | 2.063324 | 70 | 6  | 0 | 5.215699  | 1.429586 | -1.16813 |
| 33            | 6             | 0           | -1.702853               | 4.432283 | 0.754146 | 71 | 1  | 0 | 5.470501  | -0.54195 | -2.91826 |
| 34            | 1             | 0           | -0.767775               | 4.243824 | -1.17947 | 72 | 1  | 0 | 4.487257  | 0.664099 | -3.77351 |
| 35            | 1             | 0           | -2.719423               | 4.302755 | 2.655499 | 73 | 1  | 0 | 3.766844  | -0.88869 | -3.27729 |
|               |               |             |                         |          |          | 74 | 1  | 0 | 6.12352   | 0.828539 | -1.02676 |
|               |               |             |                         |          |          | 75 | 1  | 0 | 4.970107  | 1.902867 | -0.20701 |
|               |               |             |                         |          |          | 76 | 1  | 0 | 5.440917  | 2.219957 | -1.89603 |

| TS <sub>FG</sub> |               |             |                         |          |          |   |   |   |    |   |   |           |          |          |
|------------------|---------------|-------------|-------------------------|----------|----------|---|---|---|----|---|---|-----------|----------|----------|
| Center Number    | Atomic Number | Atomic Type | Coordinates (Angstroms) |          |          | x | y | z |    |   |   |           |          |          |
|                  |               |             | x                       | y        | z        |   |   |   |    |   |   |           |          |          |
| 1                | 6             | 0           | -0.136199               | -1.2957  | 2.610707 |   |   |   | 36 | 1 | 0 | -0.1237   | -0.9533  | 4.750008 |
| 2                | 6             | 0           | -0.436                  | -0.5852  | 3.773308 |   |   |   | 37 | 1 | 0 | -1.419606 | 1.173399 | 4.549908 |
| 3                | 6             | 0           | -1.151804               | 0.610098 | 3.654808 |   |   |   | 38 | 1 | 0 | -2.167707 | 1.982896 | 2.365207 |
| 4                | 6             | 0           | -1.561005               | 1.077797 | 2.411308 |   |   |   | 39 | 1 | 0 | -0.244098 | -1.3695  | 0.471707 |
| 5                | 6             | 0           | -1.261603               | 0.384799 | 1.215808 |   |   |   | 40 | 1 | 0 | -0.56931  | 3.0426   | 1.199208 |
| 6                | 6             | 0           | -0.5247                 | -0.8116  | 1.365708 |   |   |   | 41 | 1 | 0 | -0.568316 | 5.354    | 0.440808 |
| 7                | 6             | 0           | -1.669804               | 0.848498 | -0.11989 |   |   |   | 42 | 1 | 0 | -1.727418 | 6.017197 | -1.67659 |
| 8                | 6             | 0           | -1.736807               | 2.251698 | -0.45909 |   |   |   | 43 | 1 | 0 | -2.882014 | 4.251895 | -3.01459 |
| 9                | 6             | 0           | -1.10171                | 3.288599 | 0.281408 |   |   |   | 44 | 1 | 0 | -2.901808 | 1.912295 | -2.25299 |
| 10               | 6             | 0           | -1.091813               | 4.604498 | -0.15469 |   |   |   | 45 | 1 | 0 | -1.413599 | -1.1014  | -1.23559 |
| 11               | 6             | 0           | -1.729114               | 4.979498 | -1.34539 |   |   |   | 46 | 1 | 0 | -3.913203 | 0.586291 | -0.59909 |
| 12               | 6             | 0           | -2.369913               | 3.990696 | -2.08719 |   |   |   | 47 | 1 | 0 | -4.705401 | -0.60241 | 2.314808 |
| 13               | 6             | 0           | -2.384109               | 2.663996 | -1.65839 |   |   |   | 48 | 1 | 0 | -3.211799 | -1.52371 | 2.586907 |
| 14               | 6             | 0           | -2.017701               | -0.1826  | -1.20639 |   |   |   | 49 | 1 | 0 | -4.779897 | -2.36161 | 2.555008 |
| 15               | 6             | 0           | -3.261701               | -0.30391 | -0.57539 |   |   |   | 50 | 1 | 0 | -5.731697 | -2.26221 | -1.55809 |
| 16               | 14            | 0           | -4.036498               | -1.82291 | 0.237908 |   |   |   | 51 | 1 | 0 | -6.280794 | -2.89831 | 0.008307 |
| 17               | 6             | 0           | -4.194599               | -1.55141 | 2.094608 |   |   |   | 52 | 1 | 0 | -6.376799 | -1.15771 | -0.32739 |
| 18               | 6             | 0           | -5.763596               | -2.05811 | -0.47859 |   |   |   | 53 | 1 | 0 | -2.773593 | -3.47281 | -1.16659 |
| 19               | 6             | 0           | -2.981794               | -3.34361 | -0.09409 |   |   |   | 54 | 1 | 0 | -3.495992 | -4.25081 | 0.255807 |
| 20               | 19            | 0           | 0.326495                | 1.056603 | -2.26749 |   |   |   | 55 | 1 | 0 | -2.020294 | -3.285   | 0.437407 |
| 21               | 6             | 0           | 3.279193                | 1.17821  | 0.601808 |   |   |   | 56 | 1 | 0 | 1.632091  | 2.364706 | 1.282907 |
| 22               | 6             | 0           | 4.087798                | -0.11709 | 0.941008 |   |   |   | 57 | 1 | 0 | 2.769291  | 1.928808 | 2.576608 |
| 23               | 8             | 0           | 3.2257                  | -1.17419 | 0.438608 |   |   |   | 58 | 1 | 0 | 1.624695  | 0.714406 | 1.941308 |
| 24               | 8             | 0           | 2.523295                | 0.767908 | -0.57259 |   |   |   | 59 | 1 | 0 | 4.78169   | 2.650014 | 1.078608 |
| 25               | 6             | 0           | 2.271392                | 1.559707 | 1.670308 |   |   |   | 60 | 1 | 0 | 3.484589  | 3.235211 | 0.018107 |
| 26               | 6             | 0           | 4.13029                 | 2.374313 | 0.237507 |   |   |   | 61 | 1 | 0 | 4.757592  | 2.185214 | -0.64109 |
| 27               | 6             | 0           | 5.395598                | -0.23018 | 0.174008 |   |   |   | 62 | 1 | 0 | 5.8084    | -1.23678 | 0.322408 |
| 28               | 6             | 0           | 4.321198                | -0.34259 | 2.417708 |   |   |   | 63 | 1 | 0 | 6.136896  | 0.497218 | 0.529408 |
| 29               | 8             | 0           | 1.6658                  | -1.23209 | -1.45039 |   |   |   | 64 | 1 | 0 | 5.251396  | -0.08028 | -0.90549 |
| 30               | 6             | 0           | 1.736603                | -2.63999 | -1.80939 |   |   |   | 65 | 1 | 0 | 4.897796  | 0.488415 | 2.847608 |
| 31               | 6             | 0           | 0.779004                | -2.7896  | -2.97689 |   |   |   | 66 | 1 | 0 | 4.897701  | -1.26519 | 2.565107 |
| 32               | 6             | 0           | 1.295005                | -3.49789 | -0.63669 |   |   |   | 67 | 1 | 0 | 3.378998  | -0.43699 | 2.971008 |
| 33               | 6             | 0           | 3.157705                | -2.96949 | -2.23659 |   |   |   | 68 | 1 | 0 | 1.100803  | -2.1724  | -3.82799 |
| 34               | 5             | 0           | 2.453599                | -0.61069 | -0.53679 |   |   |   | 69 | 1 | 0 | -0.237896 | -2.4863  | -2.68829 |
| 35               | 1             | 0           | 0.428602                | -2.2287  | 2.667208 |   |   |   | 70 | 1 | 0 | 0.741607  | -3.8353  | -3.30959 |
|                  |               |             |                         |          |          |   |   |   | 71 | 1 | 0 | 1.934205  | -3.33709 | 0.240807 |
|                  |               |             |                         |          |          |   |   |   | 72 | 1 | 0 | 1.355508  | -4.55949 | -0.91319 |
|                  |               |             |                         |          |          |   |   |   | 73 | 1 | 0 | 0.252806  | -3.2831  | -0.36089 |
|                  |               |             |                         |          |          |   |   |   | 74 | 1 | 0 | 3.204506  | -3.99769 | -2.61989 |
|                  |               |             |                         |          |          |   |   |   | 75 | 1 | 0 | 3.862105  | -2.88889 | -1.39799 |
|                  |               |             |                         |          |          |   |   |   | 76 | 1 | 0 | 3.486003  | -2.29259 | -3.03809 |

**IntG**

| Center Number | Atomic Number | Atomic Type | Coordinates (Angstroms) |          |          |    |   |   |           |          |          |
|---------------|---------------|-------------|-------------------------|----------|----------|----|---|---|-----------|----------|----------|
|               |               |             | x                       | y        | z        |    |   |   |           |          |          |
| 1             | 6             | 0           | -3.439146               | 3.46052  | 0.384828 | 36 | 1 | 0 | -5.103991 | 4.633927 | -0.34689 |
| 2             | 6             | 0           | -4.690932               | 3.636774 | -0.20048 | 37 | 1 | 0 | -6.390005 | 2.609506 | -1.05003 |
| 3             | 6             | 0           | -5.402992               | 2.500828 | -0.59892 | 38 | 1 | 0 | -5.4738   | 0.364242 | -0.7129  |
| 4             | 6             | 0           | -4.880431               | 1.228676 | -0.41263 | 39 | 1 | 0 | -1.917331 | 2.096836 | 1.009054 |
| 5             | 6             | 0           | -3.613149               | 1.015165 | 0.182063 | 40 | 1 | 0 | -3.441436 | -0.08163 | -2.32249 |
| 6             | 6             | 0           | -2.9103                 | 2.184459 | 0.561865 | 41 | 1 | 0 | -3.806498 | -1.86905 | -3.95796 |
| 7             | 6             | 0           | -3.061626               | -0.32536 | 0.385366 | 42 | 1 | 0 | -3.942257 | -4.25344 | -3.22726 |
| 8             | 6             | 0           | -3.340228               | -1.38524 | -0.59065 | 43 | 1 | 0 | -3.700974 | -4.78836 | -0.80064 |
| 9             | 6             | 0           | -3.485236               | -1.11556 | -1.97221 | 44 | 1 | 0 | -3.336939 | -3.00094 | 0.842825 |
| 10            | 6             | 0           | -3.699935               | -2.12728 | -2.90373 | 45 | 1 | 0 | -2.089113 | 0.331142 | 2.13239  |
| 11            | 6             | 0           | -3.774122               | -3.46024 | -2.49987 | 46 | 1 | 0 | -1.163397 | -2.40255 | 1.055597 |
| 12            | 6             | 0           | -3.632622               | -3.75513 | -1.14279 | 47 | 1 | 0 | 1.537249  | 0.228574 | 1.673461 |
| 13            | 6             | 0           | -3.418343               | -2.74399 | -0.21305 | 48 | 1 | 0 | 1.917908  | 0.392737 | 3.402606 |
| 14            | 6             | 0           | -2.12619                | -0.51942 | 1.435136 | 49 | 1 | 0 | 0.453725  | 1.149132 | 2.738729 |
| 15            | 6             | 0           | -1.196001               | -1.51341 | 1.698691 | 50 | 1 | 0 | 0.740249  | -3.71242 | 3.317311 |
| 16            | 14            | 0           | 0.083261                | -1.31441 | 3.013539 | 51 | 1 | 0 | 2.105457  | -2.63457 | 3.676978 |
| 17            | 6             | 0           | 1.095511                | 0.254705 | 2.682604 | 52 | 1 | 0 | 1.655865  | -2.97461 | 1.99177  |
| 18            | 6             | 0           | 1.252936                | -2.79257 | 2.999625 | 53 | 1 | 0 | -1.336723 | -0.27073 | 4.79154  |
| 19            | 6             | 0           | -0.638169               | -1.11995 | 4.748027 | 54 | 1 | 0 | 0.151848  | -0.93841 | 5.492818 |
| 20            | 6             | 0           | 3.368859                | -1.34883 | -1.40443 | 55 | 1 | 0 | -1.192819 | -2.01863 | 5.054483 |
| 21            | 6             | 0           | 4.488508                | -0.62992 | -0.59188 | 56 | 1 | 0 | 2.664772  | -1.61926 | -3.41248 |
| 22            | 8             | 0           | 4.05381                 | 0.76021  | -0.63067 | 57 | 1 | 0 | 4.402616  | -1.92784 | -3.22685 |
| 23            | 8             | 0           | 2.206633                | -0.52759 | -1.09822 | 58 | 1 | 0 | 3.792462  | -0.25494 | -3.24636 |
| 24            | 6             | 0           | 3.577952                | -1.27753 | -2.90797 | 59 | 1 | 0 | 3.989483  | -3.39176 | -1.1115  |
| 25            | 6             | 0           | 3.091057                | -2.77247 | -0.9818  | 60 | 1 | 0 | 2.2954    | -3.19963 | -1.60638 |
| 26            | 6             | 0           | 4.522274                | -1.03804 | 0.872811 | 61 | 1 | 0 | 2.774369  | -2.83638 | 0.065195 |
| 27            | 6             | 0           | 5.86995                 | -0.72876 | -1.19674 | 62 | 1 | 0 | 5.17666   | -0.34648 | 1.419733 |
| 28            | 8             | 0           | 1.797581                | 1.729118 | -0.63344 | 63 | 1 | 0 | 4.919691  | -2.0541  | 0.996681 |
| 29            | 6             | 0           | 2.080558                | 3.104441 | -0.25136 | 64 | 1 | 0 | 3.526037  | -0.99855 | 1.336923 |
| 30            | 6             | 0           | 0.713875                | 3.737338 | -0.0672  | 65 | 1 | 0 | 6.179467  | -1.78043 | -1.27311 |
| 31            | 6             | 0           | 2.843063                | 3.771324 | -1.38172 | 66 | 1 | 0 | 6.594307  | -0.21049 | -0.5549  |
| 32            | 6             | 0           | 2.863092                | 3.139231 | 1.050109 | 67 | 1 | 0 | 5.915515  | -0.27816 | -2.19456 |
| 33            | 5             | 0           | 2.695984                | 0.725531 | -0.77377 | 68 | 1 | 0 | 0.16577   | 3.241852 | 0.748157 |
| 34            | 19            | 0           | -0.436075               | 0.078147 | -0.90909 | 69 | 1 | 0 | 0.118976  | 3.662899 | -0.98917 |
| 35            | 1             | 0           | -2.852683               | 4.326879 | 0.695298 | 70 | 1 | 0 | 0.813769  | 4.800175 | 0.189488 |
|               |               |             |                         |          |          | 71 | 1 | 0 | 3.820982  | 3.296898 | -1.53732 |
|               |               |             |                         |          |          | 72 | 1 | 0 | 3.014467  | 4.830386 | -1.1463  |
|               |               |             |                         |          |          | 73 | 1 | 0 | 2.272689  | 3.717653 | -2.31919 |
|               |               |             |                         |          |          | 74 | 1 | 0 | 2.997071  | 4.182178 | 1.367926 |
|               |               |             |                         |          |          | 75 | 1 | 0 | 3.856155  | 2.686468 | 0.940209 |
|               |               |             |                         |          |          | 76 | 1 | 0 | 2.321386  | 2.608603 | 1.845477 |

| TS <sub>GH</sub> |               |             |                         |          |          |  |  |  |  |  |  |
|------------------|---------------|-------------|-------------------------|----------|----------|--|--|--|--|--|--|
| Center Number    | Atomic Number | Atomic Type | Coordinates (Angstroms) |          |          |  |  |  |  |  |  |
|                  |               |             | x                       | y        | z        |  |  |  |  |  |  |
| 1                | 6             | 0           | 3.500616                | 2.835191 | -1.51028 |  |  |  |  |  |  |
| 2                | 6             | 0           | 3.133081                | 3.914966 | -0.71037 |  |  |  |  |  |  |
| 3                | 6             | 0           | 2.503902                | 3.663701 | 0.509816 |  |  |  |  |  |  |
| 4                | 6             | 0           | 2.220642                | 2.361582 | 0.90628  |  |  |  |  |  |  |
| 5                | 6             | 0           | 2.543404                | 1.252591 | 0.100416 |  |  |  |  |  |  |
| 6                | 6             | 0           | 3.215393                | 1.532453 | -1.10798 |  |  |  |  |  |  |
| 7                | 6             | 0           | 2.169763                | -0.12776 | 0.485072 |  |  |  |  |  |  |
| 8                | 6             | 0           | 3.134761                | -1.21292 | 0.249257 |  |  |  |  |  |  |
| 9                | 6             | 0           | 0.922031                | -0.42009 | 1.054207 |  |  |  |  |  |  |
| 10               | 6             | 0           | 4.529298                | -0.98384 | 0.269336 |  |  |  |  |  |  |
| 11               | 6             | 0           | 5.445332                | -2.00884 | 0.072709 |  |  |  |  |  |  |
| 12               | 6             | 0           | 5.016168                | -3.31845 | -0.15604 |  |  |  |  |  |  |
| 13               | 6             | 0           | 3.647362                | -3.57357 | -0.18543 |  |  |  |  |  |  |
| 14               | 6             | 0           | 2.727969                | -2.54364 | -0.0002  |  |  |  |  |  |  |
| 15               | 6             | 0           | -0.242372               | 0.355503 | 1.251843 |  |  |  |  |  |  |
| 16               | 5             | 0           | -2.054312               | 0.129651 | -0.20007 |  |  |  |  |  |  |
| 17               | 14            | 0           | -1.064243               | 0.142733 | 2.910188 |  |  |  |  |  |  |
| 18               | 8             | 0           | -2.934548               | -0.72039 | 0.500632 |  |  |  |  |  |  |
| 19               | 6             | 0           | -3.400187               | -1.69527 | -0.43428 |  |  |  |  |  |  |
| 20               | 6             | 0           | -2.168386               | -1.87099 | -1.37023 |  |  |  |  |  |  |
| 21               | 8             | 0           | -1.584841               | -0.5484  | -1.36381 |  |  |  |  |  |  |
| 22               | 6             | 0           | -3.818912               | -2.94916 | 0.307343 |  |  |  |  |  |  |
| 23               | 6             | 0           | -4.612258               | -1.11404 | -1.15664 |  |  |  |  |  |  |
| 24               | 6             | 0           | -2.508471               | -2.23934 | -2.80101 |  |  |  |  |  |  |
| 25               | 6             | 0           | -1.159318               | -2.86432 | -0.81045 |  |  |  |  |  |  |
| 26               | 6             | 0           | -1.456124               | -1.65955 | 3.310044 |  |  |  |  |  |  |
| 27               | 6             | 0           | 0.114712                | 0.733319 | 4.27882  |  |  |  |  |  |  |
| 28               | 6             | 0           | -2.61453                | 1.19543  | 3.104453 |  |  |  |  |  |  |
| 29               | 6             | 0           | -2.001117               | 2.541888 | -1.07182 |  |  |  |  |  |  |
| 30               | 1             | 0           | 4.017715                | 3.003921 | -2.45499 |  |  |  |  |  |  |
| 31               | 1             | 0           | 3.350844                | 4.935559 | -1.02221 |  |  |  |  |  |  |
| 32               | 1             | 0           | 2.237787                | 4.492415 | 1.166364 |  |  |  |  |  |  |
| 33               | 1             | 0           | 1.747799                | 2.18939  | 1.872646 |  |  |  |  |  |  |
| 34               | 1             | 0           | 3.560107                | 0.710141 | -1.74119 |  |  |  |  |  |  |
| 35               | 1             | 0           | 0.839                   | -1.4636  | 1.393604 |  |  |  |  |  |  |
| 36               | 1             | 0           | 4.898119                | 0.022436 | 0.469575 |  |  |  |  |  |  |
| 37               | 1             | 0           | 6.51167                 | -1.78444 | 0.110635 |  |  |  |  |  |  |
| 38               | 1             | 0           | 5.735938                | -4.12129 | -0.30943 |  |  |  |  |  |  |
| 39               | 1             | 0           | 3.283794                | -4.58538 | -0.36719 |  |  |  |  |  |  |
| 40               | 1             | 0           | 1.66411                 | -2.78644 | -0.03845 |  |  |  |  |  |  |
| 41               | 1             | 0           | -0.127266               | 1.416798 | 0.997457 |  |  |  |  |  |  |
| 42               | 1             | 0           | -4.67961                | -2.72227 | 0.951214 |  |  |  |  |  |  |
| 43               | 1             | 0           | -4.124079               | -3.73684 | -0.39676 |  |  |  |  |  |  |
| 44               | 1             | 0           | -3.018871               | -3.34417 | 0.943629 |  |  |  |  |  |  |
| 45               | 1             | 0           | -4.35624                | -0.20641 | -1.71966 |  |  |  |  |  |  |
| 46               | 1             | 0           | -5.36603                | -0.83851 | -0.40735 |  |  |  |  |  |  |
| 47               | 1             | 0           | -5.066975               | -1.83725 | -1.84768 |  |  |  |  |  |  |
| 48               | 1             | 0           | -1.591312               | -2.37901 | -3.39316 |  |  |  |  |  |  |
| 49               | 1             | 0           | -3.109864               | -1.46363 | -3.28945 |  |  |  |  |  |  |
| 50               | 1             | 0           | -3.06444                | -3.18716 | -2.83666 |  |  |  |  |  |  |
| 51               | 1             | 0           | -0.859657               | -2.60529 | 0.21352  |  |  |  |  |  |  |
| 52               | 1             | 0           | -0.258915               | -2.89898 | -1.44344 |  |  |  |  |  |  |
| 53               | 1             | 0           | -1.563797               | -3.88498 | -0.80997 |  |  |  |  |  |  |
| 54               | 1             | 0           | -2.235473               | -2.04603 | 2.63976  |  |  |  |  |  |  |
| 55               | 1             | 0           | -1.823458               | -1.74214 | 4.344674 |  |  |  |  |  |  |
| 56               | 1             | 0           | -0.571654               | -2.30913 | 3.22804  |  |  |  |  |  |  |
| 57               | 1             | 0           | 1.079791                | 0.204689 | 4.231164 |  |  |  |  |  |  |
| 58               | 1             | 0           | 0.323417                | 1.810858 | 4.190214 |  |  |  |  |  |  |
| 59               | 1             | 0           | -0.312418               | 0.56273  | 5.280056 |  |  |  |  |  |  |
| 60               | 1             | 0           | -2.994111               | 1.119963 | 4.135541 |  |  |  |  |  |  |
| 61               | 1             | 0           | -3.407685               | 0.886771 | 2.412299 |  |  |  |  |  |  |
| 62               | 1             | 0           | -2.391789               | 2.255899 | 2.911236 |  |  |  |  |  |  |
| 63               | 19            | 0           | 0.944794                | -0.47604 | -2.14379 |  |  |  |  |  |  |
| 64               | 8             | 0           | -2.343723               | 1.476261 | -0.19194 |  |  |  |  |  |  |
| 65               | 6             | 0           | -0.672948               | 2.343792 | -1.79394 |  |  |  |  |  |  |
| 66               | 1             | 0           | 0.138145                | 2.131778 | -1.08152 |  |  |  |  |  |  |
| 67               | 1             | 0           | -0.761472               | 1.542373 | -2.54002 |  |  |  |  |  |  |
| 68               | 1             | 0           | -0.404358               | 3.263126 | -2.3327  |  |  |  |  |  |  |
| 69               | 6             | 0           | -1.922889               | 3.787875 | -0.20099 |  |  |  |  |  |  |
| 70               | 1             | 0           | -2.863125               | 3.923315 | 0.35102  |  |  |  |  |  |  |
| 71               | 1             | 0           | -1.106237               | 3.698425 | 0.530155 |  |  |  |  |  |  |
| 72               | 1             | 0           | -1.743552               | 4.684506 | -0.81058 |  |  |  |  |  |  |
| 73               | 6             | 0           | -3.120804               | 2.678853 | -2.09551 |  |  |  |  |  |  |
| 74               | 1             | 0           | -4.085708               | 2.82411  | -1.59034 |  |  |  |  |  |  |
| 75               | 1             | 0           | -2.943652               | 3.536899 | -2.7602  |  |  |  |  |  |  |
| 76               | 1             | 0           | -3.188434               | 1.773085 | -2.71593 |  |  |  |  |  |  |

**IntH**

| Center Number | Atomic Number | Atomic Type | Coordinates (Angstroms) |          |          |  |  |  |  |  |  |
|---------------|---------------|-------------|-------------------------|----------|----------|--|--|--|--|--|--|
|               |               |             | x                       | y        | z        |  |  |  |  |  |  |
| 1             | 6             | 0           | 3.499609                | 2.728315 | -1.84732 |  |  |  |  |  |  |
| 2             | 6             | 0           | 3.116867                | 3.874925 | -1.15285 |  |  |  |  |  |  |
| 3             | 6             | 0           | 2.447404                | 3.741295 | 0.061277 |  |  |  |  |  |  |
| 4             | 6             | 0           | 2.137269                | 2.48005  | 0.56377  |  |  |  |  |  |  |
| 5             | 6             | 0           | 2.48262                 | 1.312452 | -0.13298 |  |  |  |  |  |  |
| 6             | 6             | 0           | 3.195578                | 1.468825 | -1.33731 |  |  |  |  |  |  |
| 7             | 6             | 0           | 2.10029                 | -0.05031 | 0.328708 |  |  |  |  |  |  |
| 8             | 6             | 0           | 3.149016                | -1.10029 | 0.231797 |  |  |  |  |  |  |
| 9             | 6             | 0           | 0.850438                | -0.37138 | 0.777467 |  |  |  |  |  |  |
| 10            | 6             | 0           | 4.480792                | -0.81005 | 0.572217 |  |  |  |  |  |  |
| 11            | 6             | 0           | 5.470919                | -1.78487 | 0.512444 |  |  |  |  |  |  |
| 12            | 6             | 0           | 5.160403                | -3.08113 | 0.101324 |  |  |  |  |  |  |
| 13            | 6             | 0           | 3.847335                | -3.38572 | -0.24892 |  |  |  |  |  |  |
| 14            | 6             | 0           | 2.857655                | -2.40686 | -0.189   |  |  |  |  |  |  |
| 15            | 6             | 0           | -0.360317               | 0.445161 | 0.947089 |  |  |  |  |  |  |
| 16            | 5             | 0           | -1.734847               | -0.08502 | 0.129269 |  |  |  |  |  |  |
| 17            | 14            | 0           | -0.77446                | 0.509505 | 2.804234 |  |  |  |  |  |  |
| 18            | 8             | 0           | -2.37537                | -1.17098 | 0.876109 |  |  |  |  |  |  |
| 19            | 6             | 0           | -2.979609               | -2.06216 | -0.03464 |  |  |  |  |  |  |
| 20            | 6             | 0           | -1.99108                | -2.03639 | -1.24841 |  |  |  |  |  |  |
| 21            | 8             | 0           | -1.423964               | -0.73202 | -1.19168 |  |  |  |  |  |  |
| 22            | 6             | 0           | -3.114791               | -3.42363 | 0.631143 |  |  |  |  |  |  |
| 23            | 6             | 0           | -4.383311               | -1.57125 | -0.39598 |  |  |  |  |  |  |
| 24            | 6             | 0           | -2.648389               | -2.2414  | -2.60506 |  |  |  |  |  |  |
| 25            | 6             | 0           | -0.865386               | -3.0568  | -1.09849 |  |  |  |  |  |  |
| 26            | 6             | 0           | -0.68643                | -1.19589 | 3.603558 |  |  |  |  |  |  |
| 27            | 6             | 0           | 0.497514                | 1.568363 | 3.728138 |  |  |  |  |  |  |
| 28            | 6             | 0           | -2.440861               | 1.311237 | 3.147414 |  |  |  |  |  |  |
| 29            | 6             | 0           | -2.724649               | 2.100008 | -0.91911 |  |  |  |  |  |  |
| 30            | 1             | 0           | 4.04639                 | 2.81207  | -2.78609 |  |  |  |  |  |  |
| 31            | 1             | 0           | 3.354408                | 4.862249 | -1.54624 |  |  |  |  |  |  |
| 32            | 1             | 0           | 2.1652                  | 4.627413 | 0.62922  |  |  |  |  |  |  |
| 33            | 1             | 0           | 1.631695                | 2.399131 | 1.523723 |  |  |  |  |  |  |
| 34            | 1             | 0           | 3.541985                | 0.58279  | -1.87702 |  |  |  |  |  |  |
| 35            | 1             | 0           | 0.723398                | -1.42588 | 1.05344  |  |  |  |  |  |  |
| 36            | 1             | 0           | 4.739649                | 0.19667  | 0.90261  |  |  |  |  |  |  |
| 37            | 1             | 0           | 6.492666                | -1.53138 | 0.793995 |  |  |  |  |  |  |
| 38            | 1             | 0           | 5.935845                | -3.84439 | 0.051264 |  |  |  |  |  |  |
| 39            | 1             | 0           | 3.588823                | -4.39101 | -0.58087 |  |  |  |  |  |  |
| 40            | 1             | 0           | 1.837532                | -2.66485 | -0.47667 |  |  |  |  |  |  |
| 41            | 1             | 0           | -0.164513               | 1.487569 | 0.662551 |  |  |  |  |  |  |
| 42            | 1             | 0           | -3.829033               | -3.35173 | 1.46386  |  |  |  |  |  |  |
| 43            | 1             | 0           | -3.494467               | -4.18155 | -0.0707  |  |  |  |  |  |  |
| 44            | 1             | 0           | -2.160581               | -3.77564 | 1.042589 |  |  |  |  |  |  |
| 45            | 1             | 0           | -4.356567               | -0.59809 | -0.89871 |  |  |  |  |  |  |
| 46            | 1             | 0           | -4.954617               | -1.44376 | 0.534688 |  |  |  |  |  |  |
| 47            | 1             | 0           | -4.922092               | -2.29157 | -1.0295  |  |  |  |  |  |  |
| 48            | 1             | 0           | -1.886852               | -2.20508 | -3.4011  |  |  |  |  |  |  |
| 49            | 1             | 0           | -3.395167               | -1.46809 | -2.8204  |  |  |  |  |  |  |
| 50            | 1             | 0           | -3.139086               | -3.22434 | -2.66813 |  |  |  |  |  |  |
| 51            | 1             | 0           | -0.372275               | -2.96769 | -0.12169 |  |  |  |  |  |  |
| 52            | 1             | 0           | -0.109059               | -2.88634 | -1.88245 |  |  |  |  |  |  |
| 53            | 1             | 0           | -1.219443               | -4.09082 | -1.21615 |  |  |  |  |  |  |
| 54            | 1             | 0           | 0.344664                | -1.58011 | 3.623822 |  |  |  |  |  |  |
| 55            | 1             | 0           | -1.316997               | -1.91704 | 3.066205 |  |  |  |  |  |  |
| 56            | 1             | 0           | -1.034144               | -1.13945 | 4.646708 |  |  |  |  |  |  |
| 57            | 1             | 0           | 1.528521                | 1.208657 | 3.589854 |  |  |  |  |  |  |
| 58            | 1             | 0           | 0.459484                | 2.626047 | 3.42503  |  |  |  |  |  |  |
| 59            | 1             | 0           | 0.282499                | 1.534658 | 4.808117 |  |  |  |  |  |  |
| 60            | 1             | 0           | -2.45462                | 2.351864 | 2.790532 |  |  |  |  |  |  |
| 61            | 1             | 0           | -2.629778               | 1.326985 | 4.232506 |  |  |  |  |  |  |
| 62            | 1             | 0           | -3.257962               | 0.77771  | 2.64723  |  |  |  |  |  |  |
| 63            | 19            | 0           | 0.638848                | 0.032125 | -2.47908 |  |  |  |  |  |  |
| 64            | 8             | 0           | -2.675641               | 1.036399 | -0.00491 |  |  |  |  |  |  |
| 65            | 6             | 0           | -1.444077               | 2.939309 | -0.95372 |  |  |  |  |  |  |
| 66            | 1             | 0           | -1.183607               | 3.30624  | 0.050431 |  |  |  |  |  |  |
| 67            | 1             | 0           | -0.57738                | 2.375919 | -1.33391 |  |  |  |  |  |  |
| 68            | 1             | 0           | -1.575677               | 3.81178  | -1.61045 |  |  |  |  |  |  |
| 69            | 6             | 0           | -3.863818               | 2.99759  | -0.43852 |  |  |  |  |  |  |
| 70            | 1             | 0           | -4.799663               | 2.421873 | -0.39586 |  |  |  |  |  |  |
| 71            | 1             | 0           | -3.652856               | 3.37313  | 0.573162 |  |  |  |  |  |  |
| 72            | 1             | 0           | -4.014545               | 3.858818 | -1.10608 |  |  |  |  |  |  |
| 73            | 6             | 0           | -3.05148                | 1.631194 | -2.34084 |  |  |  |  |  |  |
| 74            | 1             | 0           | -4.003527               | 1.080942 | -2.35424 |  |  |  |  |  |  |
| 75            | 1             | 0           | -3.147416               | 2.491081 | -3.0209  |  |  |  |  |  |  |
| 76            | 1             | 0           | -2.279525               | 0.955965 | -2.73285 |  |  |  |  |  |  |

## 3ad

| Center Number | Atomic Number | Atomic Type | Coordinates (Angstroms) |          |          |    |   |   |           |          |          |
|---------------|---------------|-------------|-------------------------|----------|----------|----|---|---|-----------|----------|----------|
|               |               |             | x                       | y        | z        |    |   |   |           |          |          |
| 1             | 6             | 0           | -3.175861               | -1.86374 | -2.86734 | 34 | 1 | 0 | -4.563325 | -0.03738 | 0.325658 |
| 2             | 6             | 0           | -3.183101               | -3.15949 | -2.35123 | 35 | 1 | 0 | -6.184582 | 1.78558  | 0.69001  |
| 3             | 6             | 0           | -2.768039               | -3.37783 | -1.03973 | 36 | 1 | 0 | -5.409002 | 4.149371 | 0.816619 |
| 4             | 6             | 0           | -2.342194               | -2.30937 | -0.25247 | 37 | 1 | 0 | -2.98448  | 4.656887 | 0.555741 |
| 5             | 6             | 0           | -2.3209                 | -1.00548 | -0.76002 | 38 | 1 | 0 | -1.366866 | 2.837626 | 0.169322 |
| 6             | 6             | 0           | -2.755445               | -0.79861 | -2.07659 | 39 | 1 | 0 | -0.407806 | 1.119597 | 1.187548 |
| 7             | 6             | 0           | -1.869298               | 0.149673 | 0.061723 | 40 | 1 | 0 | 0.245353  | -1.60801 | -0.14276 |
| 8             | 6             | 0           | -2.838108               | 1.258535 | 0.250806 | 41 | 1 | 0 | 0.459142  | 0.586568 | 3.60018  |
| 9             | 6             | 0           | -4.210412               | 0.993356 | 0.377826 | 42 | 1 | 0 | 2.050245  | 0.825741 | 2.848369 |
| 10            | 6             | 0           | -5.125808               | 2.020989 | 0.585145 | 43 | 1 | 0 | 1.875372  | -0.26905 | 4.236634 |
| 11            | 6             | 0           | -4.692775               | 3.343714 | 0.660167 | 44 | 1 | 0 | -1.24292  | -1.8948  | 3.017033 |
| 12            | 6             | 0           | -3.33499                | 3.62575  | 0.519037 | 45 | 1 | 0 | -0.47918  | -3.34873 | 2.32256  |
| 13            | 6             | 0           | -2.421052               | 2.597151 | 0.31052  | 46 | 1 | 0 | 0.004992  | -2.76729 | 3.926259 |
| 14            | 6             | 0           | -0.630166               | 0.226153 | 0.59529  | 47 | 1 | 0 | 2.856814  | -2.91795 | 2.912032 |
| 15            | 6             | 0           | 0.509484                | -0.71941 | 0.452736 | 48 | 1 | 0 | 3.4823    | -1.80612 | 1.675639 |
| 16            | 14            | 0           | 1.057447                | -1.37636 | 2.169833 | 49 | 1 | 0 | 2.477889  | -3.18612 | 1.196997 |
| 17            | 5             | 0           | 1.758315                | -0.03363 | -0.19162 | 50 | 1 | 0 | 3.414543  | 3.62316  | -0.41668 |
| 18            | 6             | 0           | 1.390532                | 0.078169 | 3.312312 | 51 | 1 | 0 | 4.527633  | 2.966028 | -1.6343  |
| 19            | 6             | 0           | -0.294944               | -2.44328 | 2.918311 | 52 | 1 | 0 | 2.773962  | 2.996399 | -1.94871 |
| 20            | 6             | 0           | 2.612131                | -2.412   | 1.966335 | 53 | 1 | 0 | 5.382074  | 1.587832 | 0.407706 |
| 21            | 8             | 0           | 2.689376                | -0.71447 | -0.93494 | 54 | 1 | 0 | 4.032132  | 2.166527 | 1.406753 |
| 22            | 6             | 0           | 3.583901                | 0.273197 | -1.50742 | 55 | 1 | 0 | 4.278707  | 0.421399 | 1.178832 |
| 23            | 6             | 0           | 3.419413                | 1.477195 | -0.53016 | 56 | 1 | 0 | 5.002352  | -1.14111 | -2.28447 |
| 24            | 8             | 0           | 2.064419                | 1.297571 | -0.04349 | 57 | 1 | 0 | 5.697792  | 0.451201 | -1.91782 |
| 25            | 6             | 0           | 3.536049                | 2.840084 | -1.17692 | 58 | 1 | 0 | 5.31488   | -0.68441 | -0.59828 |
| 26            | 6             | 0           | 4.33549                 | 1.399947 | 0.681556 | 59 | 1 | 0 | 3.739276  | 1.257842 | -3.4445  |
| 27            | 6             | 0           | 4.98038                 | -0.30623 | -1.57146 | 60 | 1 | 0 | 3.039592  | -0.37516 | -3.47774 |
| 28            | 6             | 0           | 3.075914                | 0.564277 | -2.91095 | 61 | 1 | 0 | 2.06359   | 0.990338 | -2.89869 |
| 29            | 1             | 0           | -3.50053                | -1.68153 | -3.89139 |    |   |   |           |          |          |
| 30            | 1             | 0           | -3.515785               | -3.99368 | -2.96777 |    |   |   |           |          |          |
| 31            | 1             | 0           | -2.780247               | -4.38448 | -0.62276 |    |   |   |           |          |          |
| 32            | 1             | 0           | -2.03406                | -2.48436 | 0.778512 |    |   |   |           |          |          |
| 33            | 1             | 0           | -2.757248               | 0.213865 | -2.48355 |    |   |   |           |          |          |

**KOtBu**

| Center Number | Atomic Number | Atomic Type | Coordinates (Angstroms) |          |          |
|---------------|---------------|-------------|-------------------------|----------|----------|
|               |               |             | x                       | y        | z        |
| 1             | 6             | 0           | 1.097377                | -0.00015 | 0.000005 |
| 2             | 6             | 0           | 1.645195                | 0.739739 | -1.23331 |
| 3             | 1             | 0           | 1.279948                | 0.253566 | -2.1516  |
| 4             | 1             | 0           | 1.279978                | 1.778834 | -1.23647 |
| 5             | 1             | 0           | 2.747462                | 0.763314 | -1.2725  |
| 6             | 6             | 0           | 1.644821                | -1.43833 | -0.02387 |
| 7             | 1             | 0           | 2.747068                | -1.48446 | -0.02371 |
| 8             | 1             | 0           | 1.278544                | -1.99031 | 0.856047 |
| 9             | 1             | 0           | 1.280053                | -1.96047 | -0.9224  |
| 10            | 6             | 0           | 1.645435                | 0.69841  | 1.257076 |
| 11            | 1             | 0           | 1.279914                | 1.736697 | 1.294836 |
| 12            | 1             | 0           | 1.280823                | 0.182118 | 2.158979 |
| 13            | 1             | 0           | 2.747699                | 0.721126 | 1.296587 |
| 14            | 8             | 0           | -0.269719               | -7.4E-05 | 0.000016 |
| 15            | 19            | 0           | -2.629511               | 0.000113 | 0.000038 |

**1a**

| Center Number | Atomic Number | Atomic Type | Coordinates (Angstroms) |          |          |
|---------------|---------------|-------------|-------------------------|----------|----------|
|               |               |             | x                       | y        | z        |
| 1             | 6             | 0           | -0.002322               | 2.405483 | 0.645903 |
| 2             | 6             | 0           | 0.00222                 | 2.405343 | -0.64608 |
| 3             | 6             | 0           | 0.00002                 | 1.04574  | 0.000056 |
| 4             | 6             | 0           | 1.278676                | 0.250763 | 0.039782 |
| 5             | 6             | 0           | -1.278664               | 0.250774 | -0.03961 |
| 6             | 6             | 0           | -1.392817               | -0.88356 | -0.85311 |
| 7             | 6             | 0           | -2.588824               | -1.59148 | -0.92952 |
| 8             | 6             | 0           | -3.696008               | -1.18299 | -0.18643 |
| 9             | 6             | 0           | -3.594877               | -0.05754 | 0.627975 |
| 10            | 6             | 0           | -2.397435               | 0.65205  | 0.695418 |
| 11            | 6             | 0           | 2.397505                | 0.652241 | -0.69509 |
| 12            | 6             | 0           | 3.59493                 | -0.05735 | -0.62779 |
| 13            | 6             | 0           | 3.696001                | -1.18304 | 0.186336 |
| 14            | 6             | 0           | 2.588809                | -1.59172 | 0.929281 |
| 15            | 6             | 0           | 1.392778                | -0.88375 | 0.852958 |
| 16            | 1             | 0           | -0.532625               | -1.21605 | -1.43589 |
| 17            | 1             | 0           | -2.656532               | -2.46782 | -1.57365 |
| 18            | 1             | 0           | -4.631059               | -1.73897 | -0.24272 |
| 19            | 1             | 0           | -4.451368               | 0.270757 | 1.216262 |
| 20            | 1             | 0           | -2.331872               | 1.536499 | 1.331588 |
| 21            | 1             | 0           | 2.33197                 | 1.536905 | -1.33097 |
| 22            | 1             | 0           | 4.4515                  | 0.270985 | -1.21593 |
| 23            | 1             | 0           | 4.631065                | -1.73902 | 0.242487 |
| 24            | 1             | 0           | 2.656429                | -2.46822 | 1.573191 |
| 25            | 1             | 0           | 0.53265                 | -1.21654 | 1.435678 |
| 26            | 1             | 0           | -0.000075               | 2.922397 | -1.5986  |
| 27            | 1             | 0           | -0.000031               | 2.923225 | 1.598047 |



# VI. $^1\text{H}$ and $^{13}\text{C}$ NMR Spectra

compound **1c**

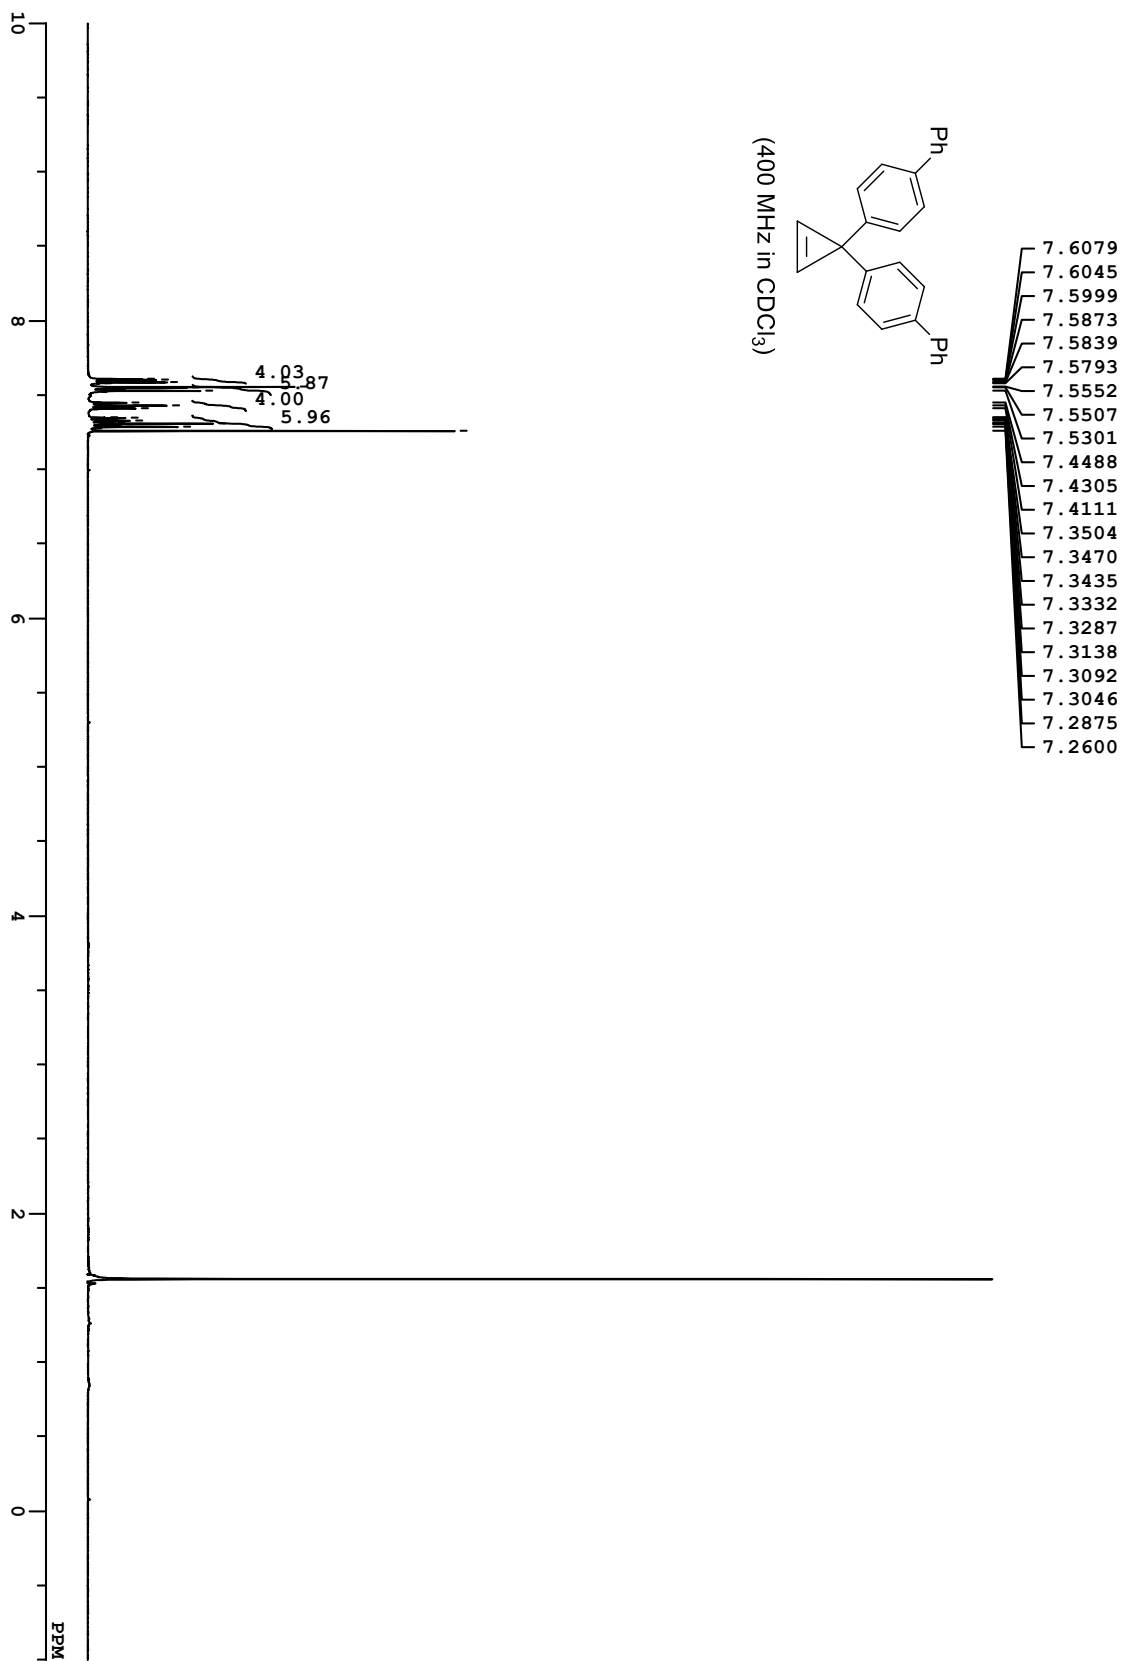

compound 1c

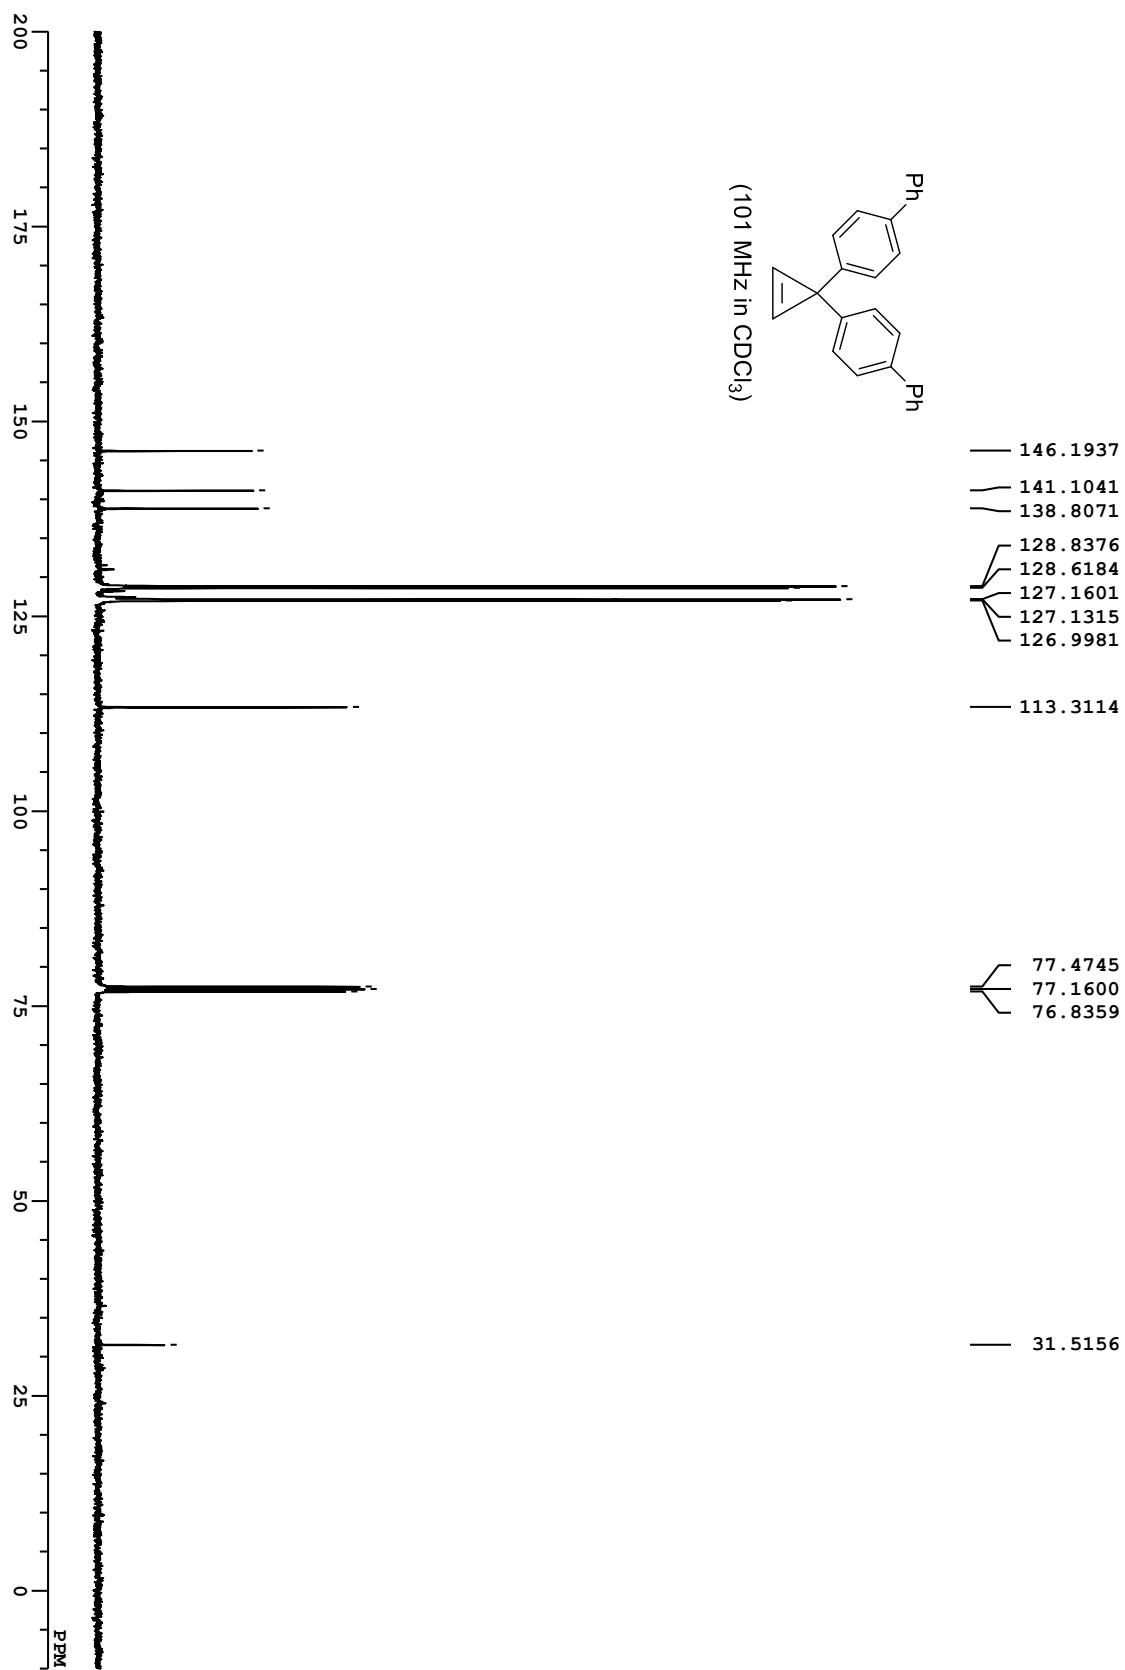

compound **1f**

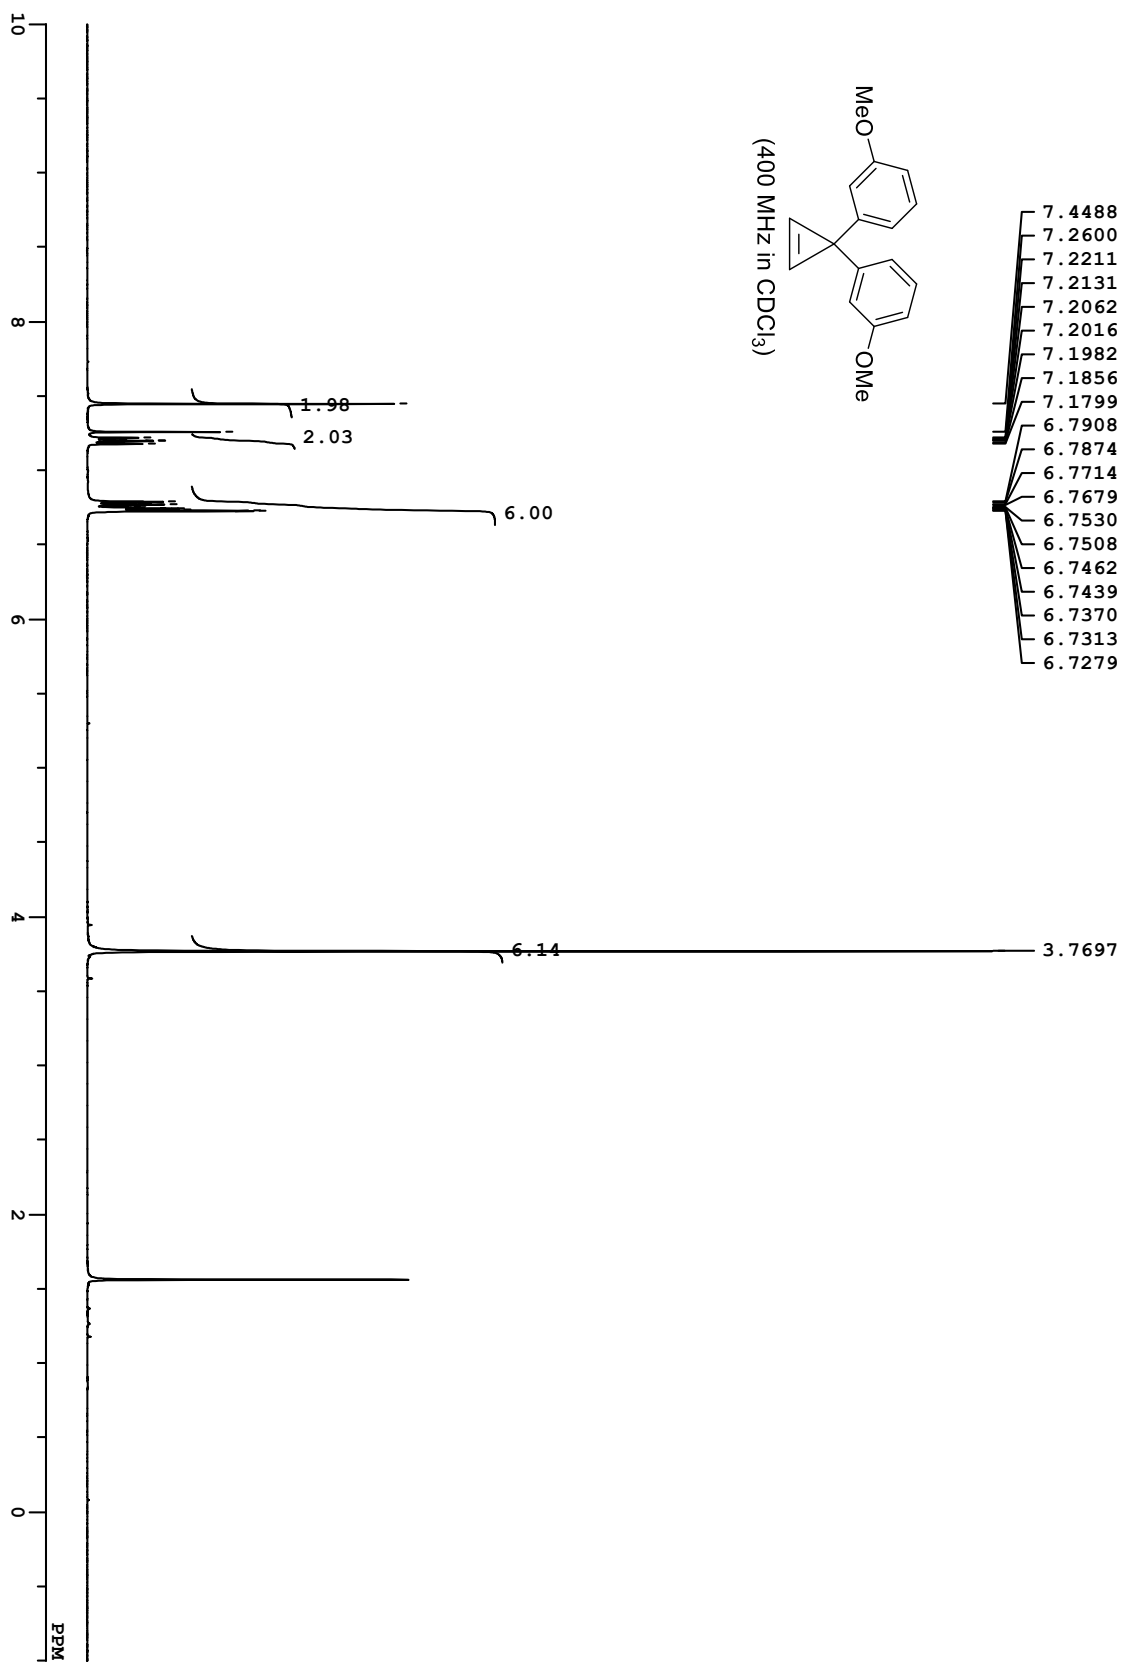

compound 1f

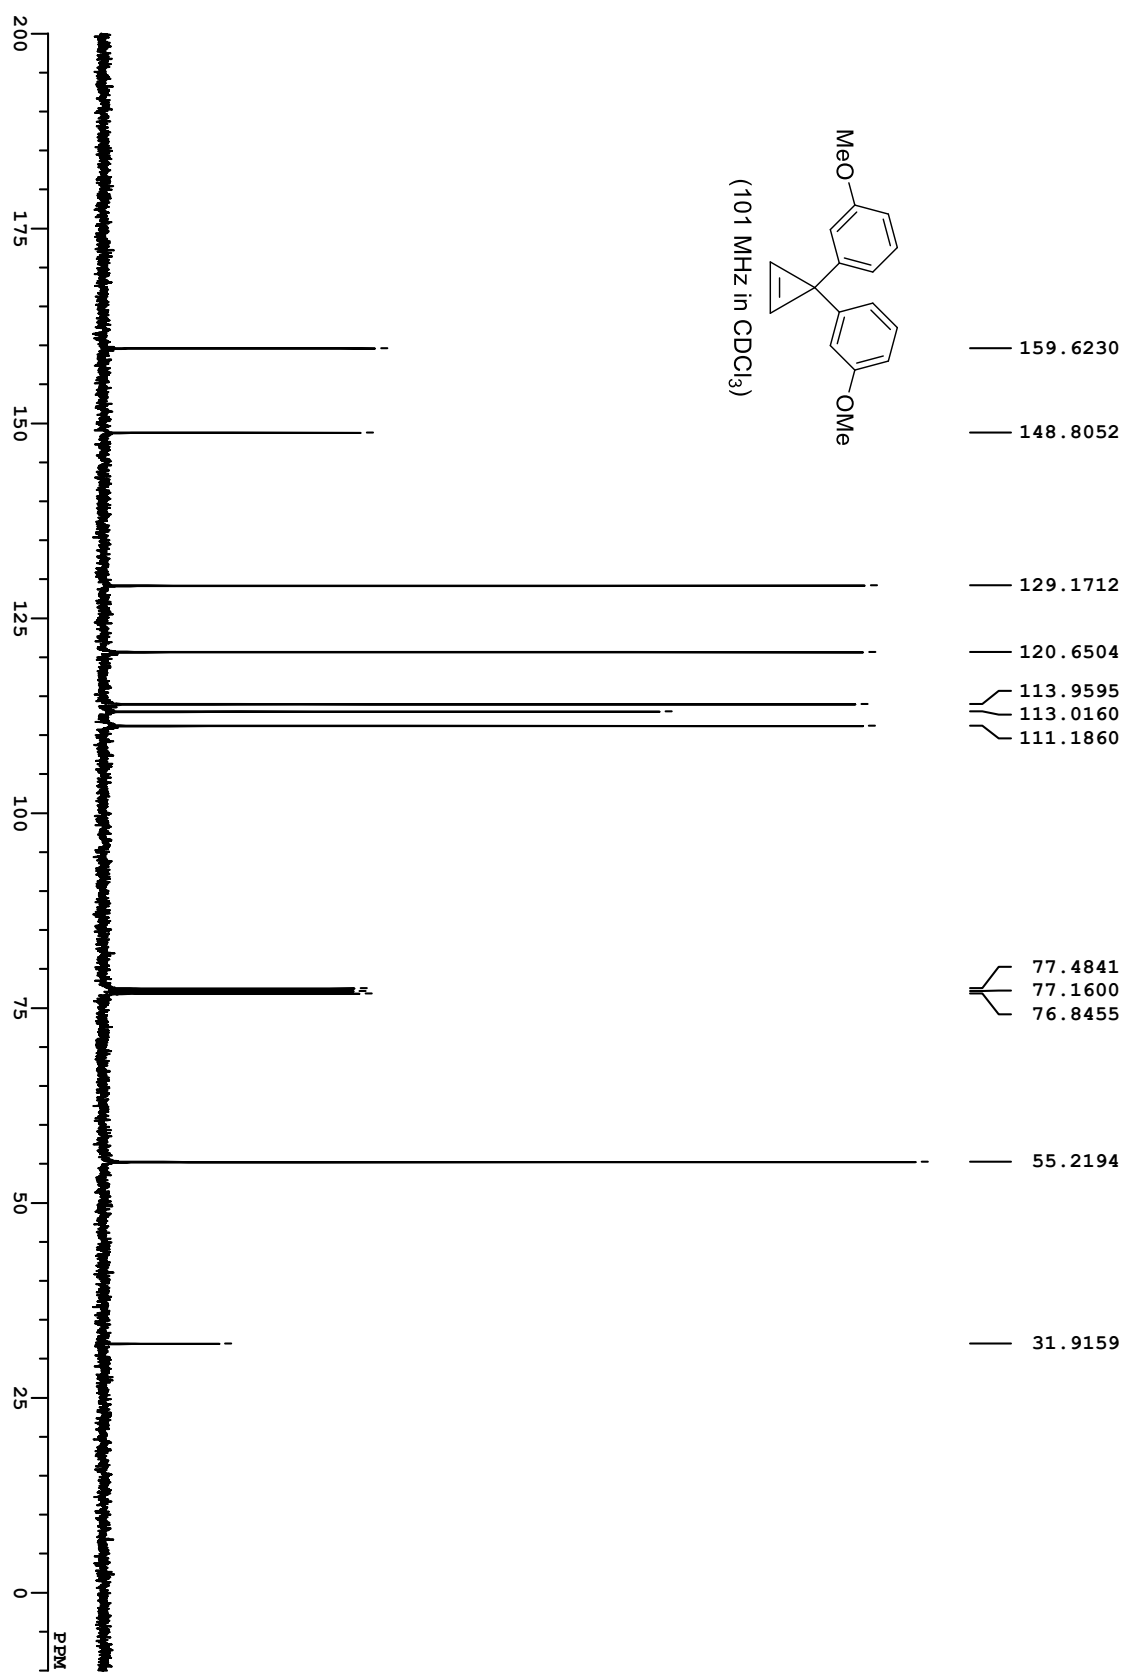

compound **1g**

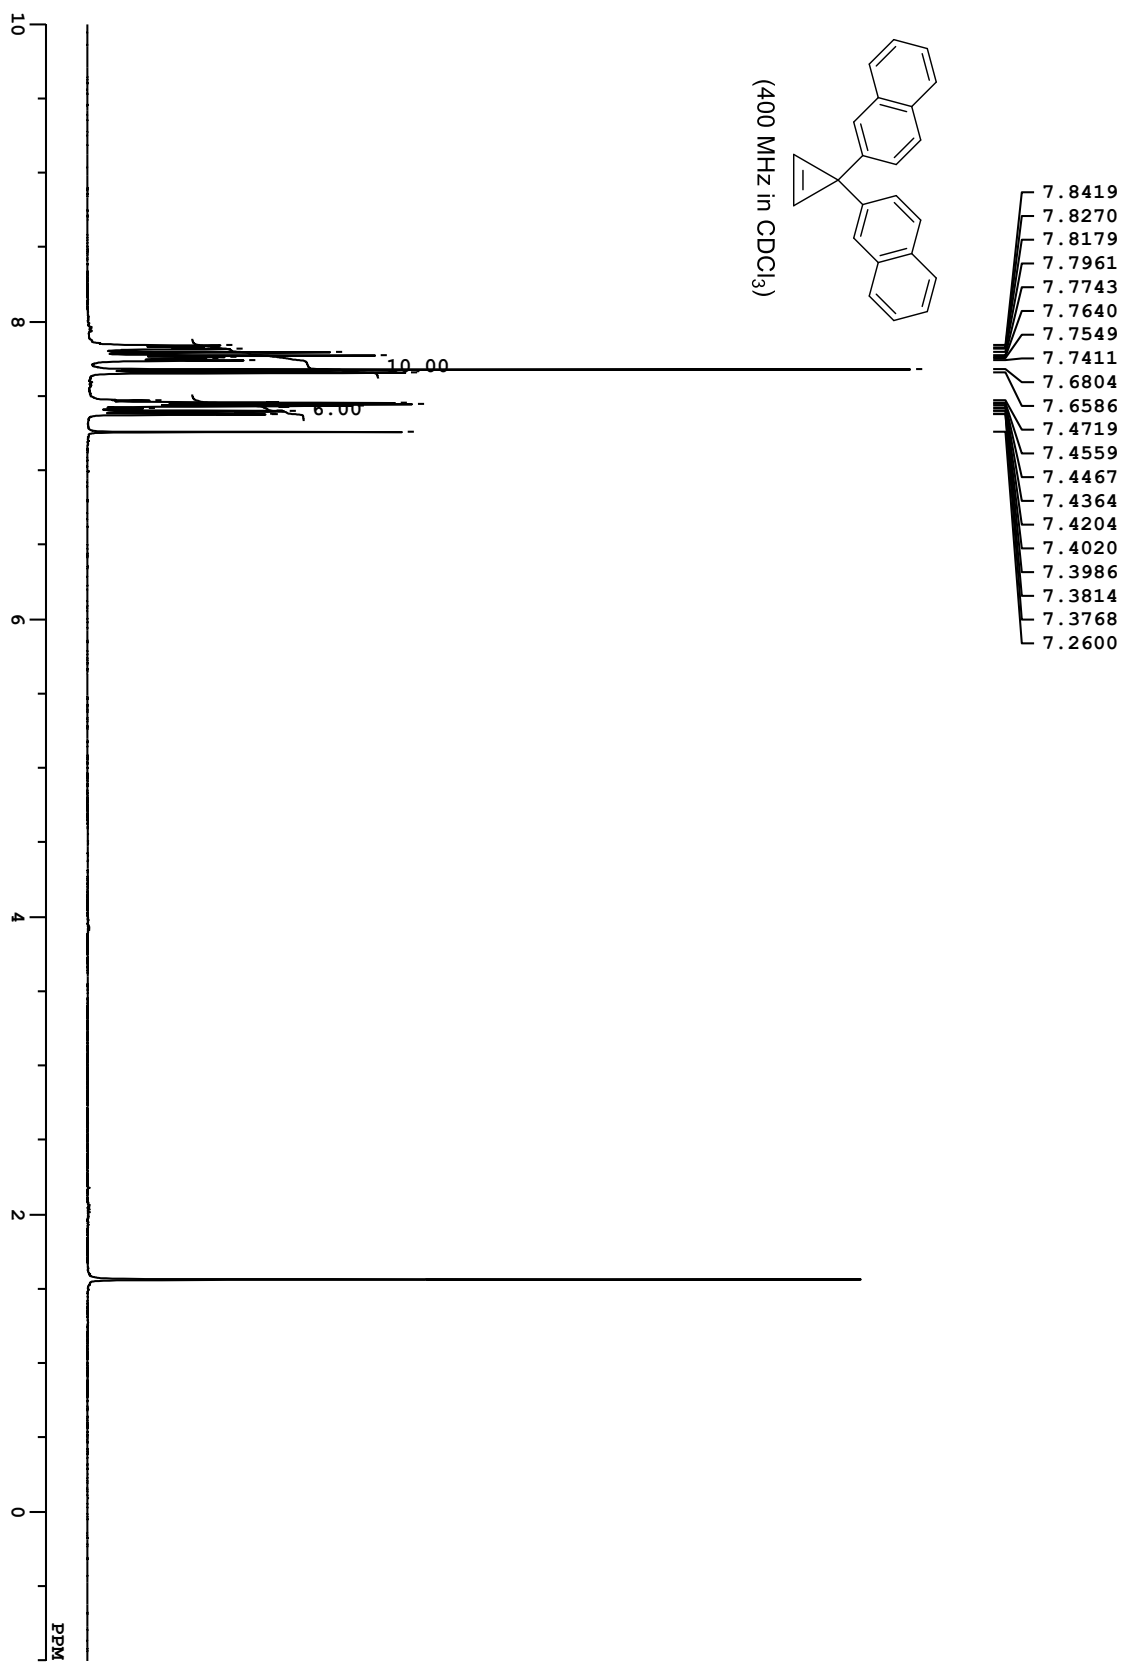

compound 1g

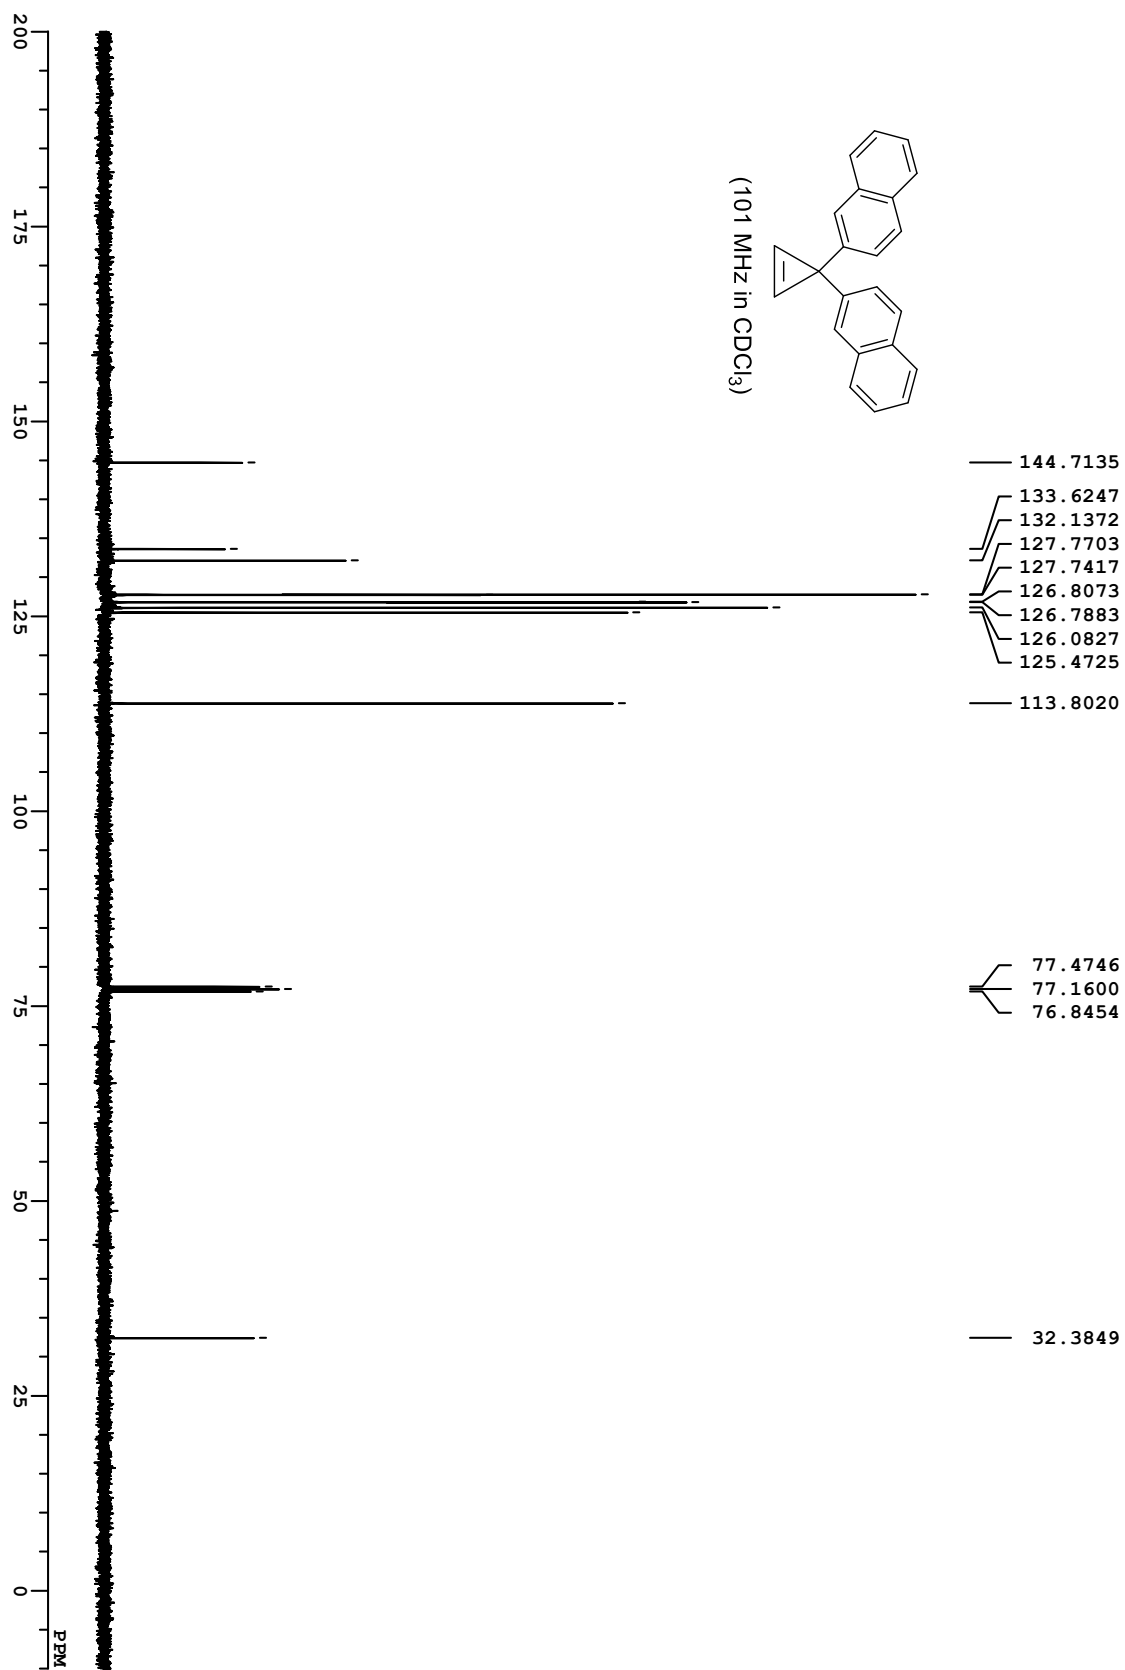

compound **1h**

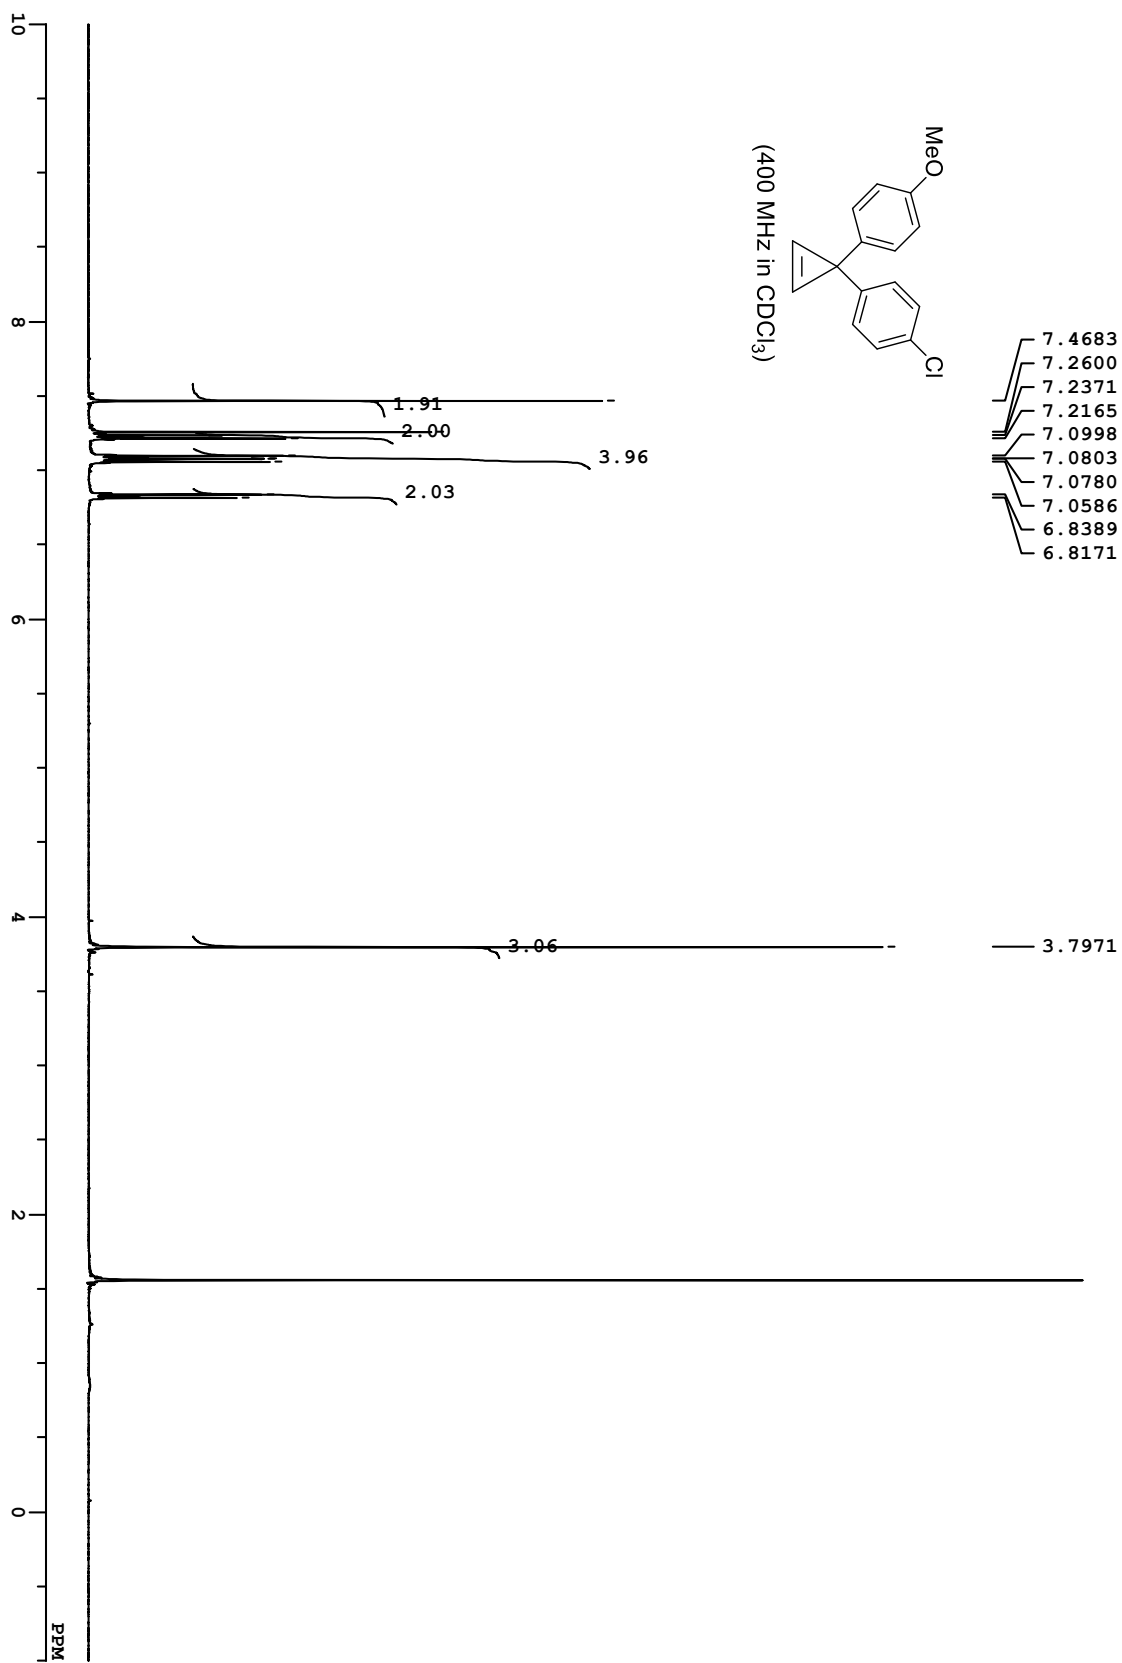

compound 1h

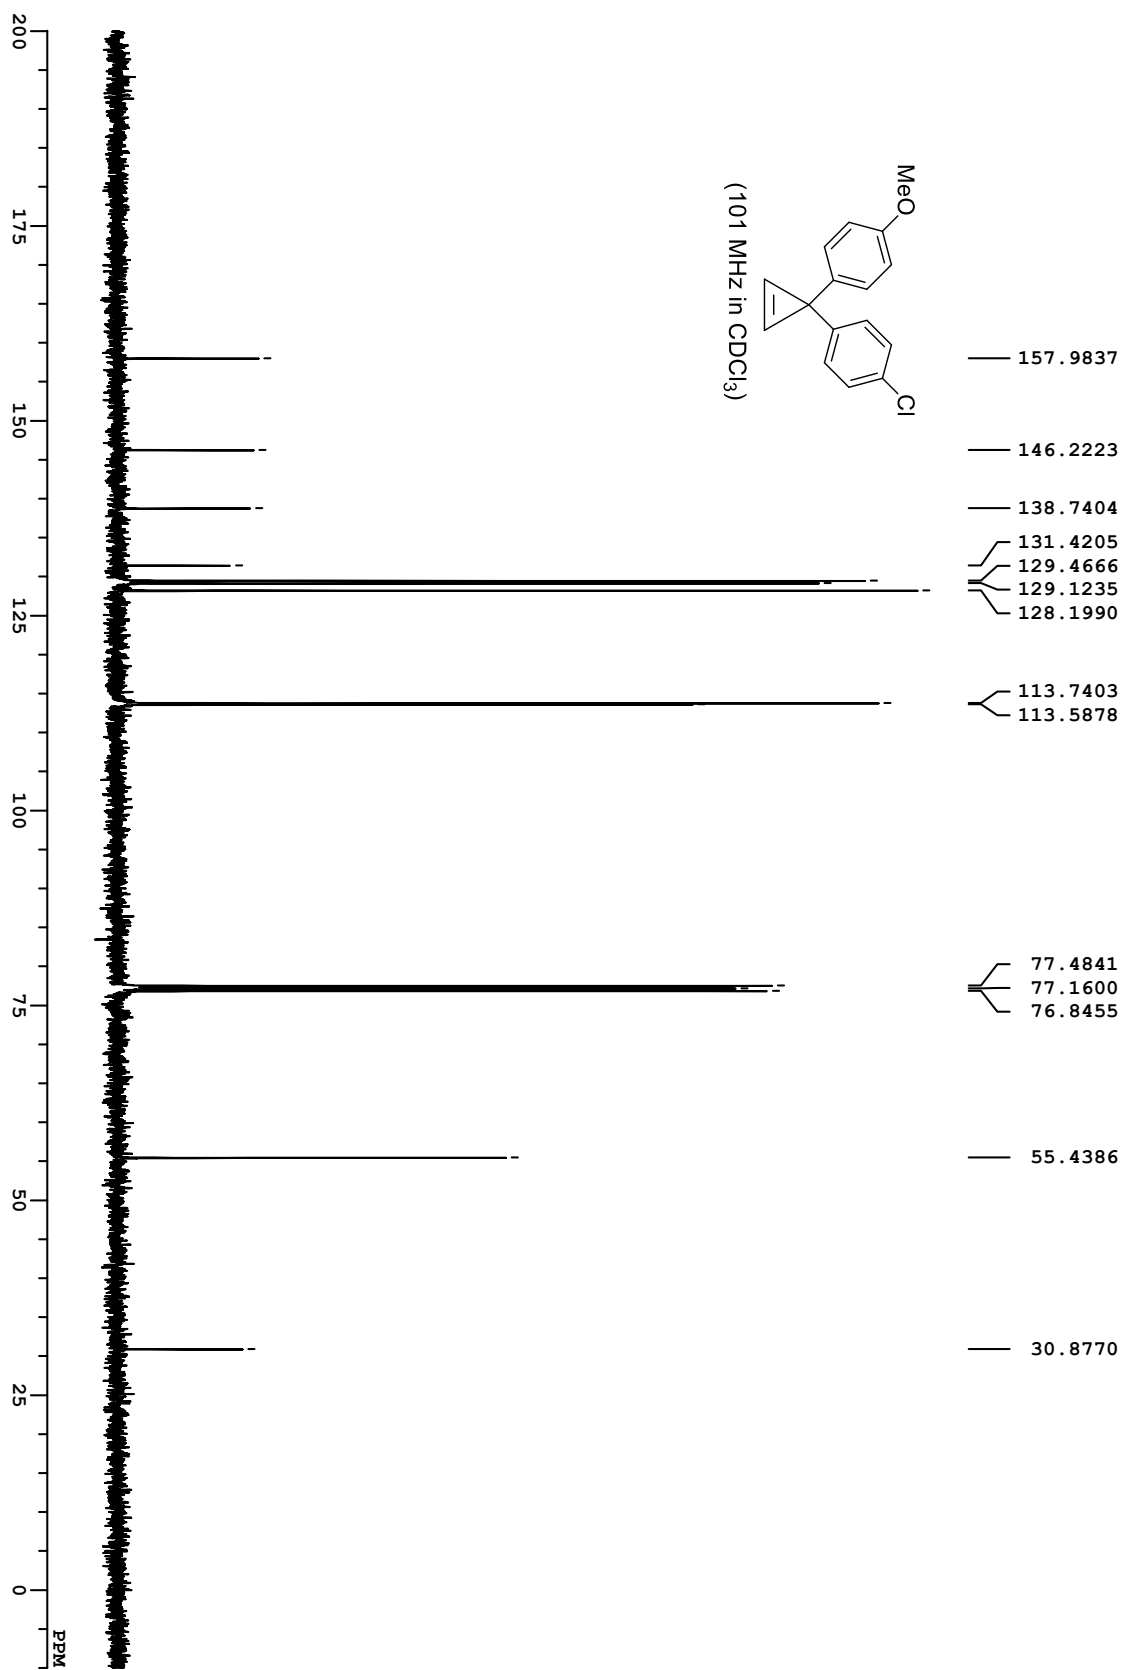



compound 3aa

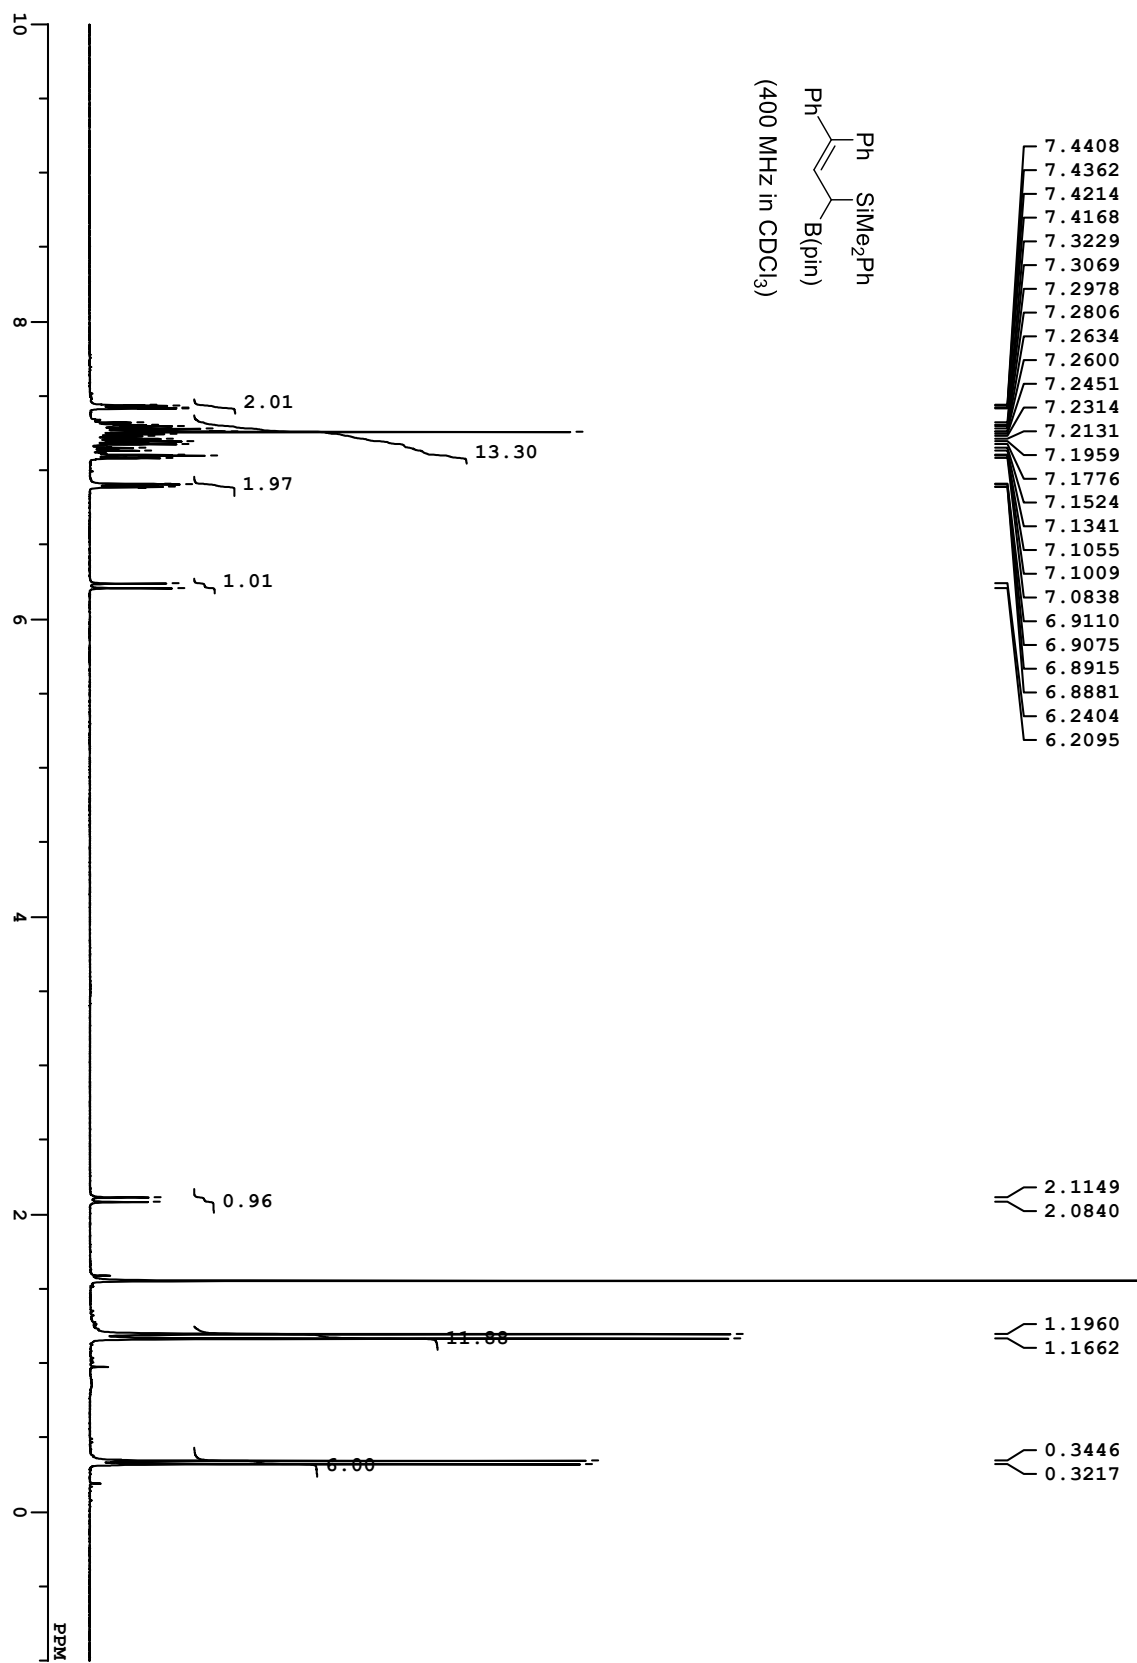

compound 3aa

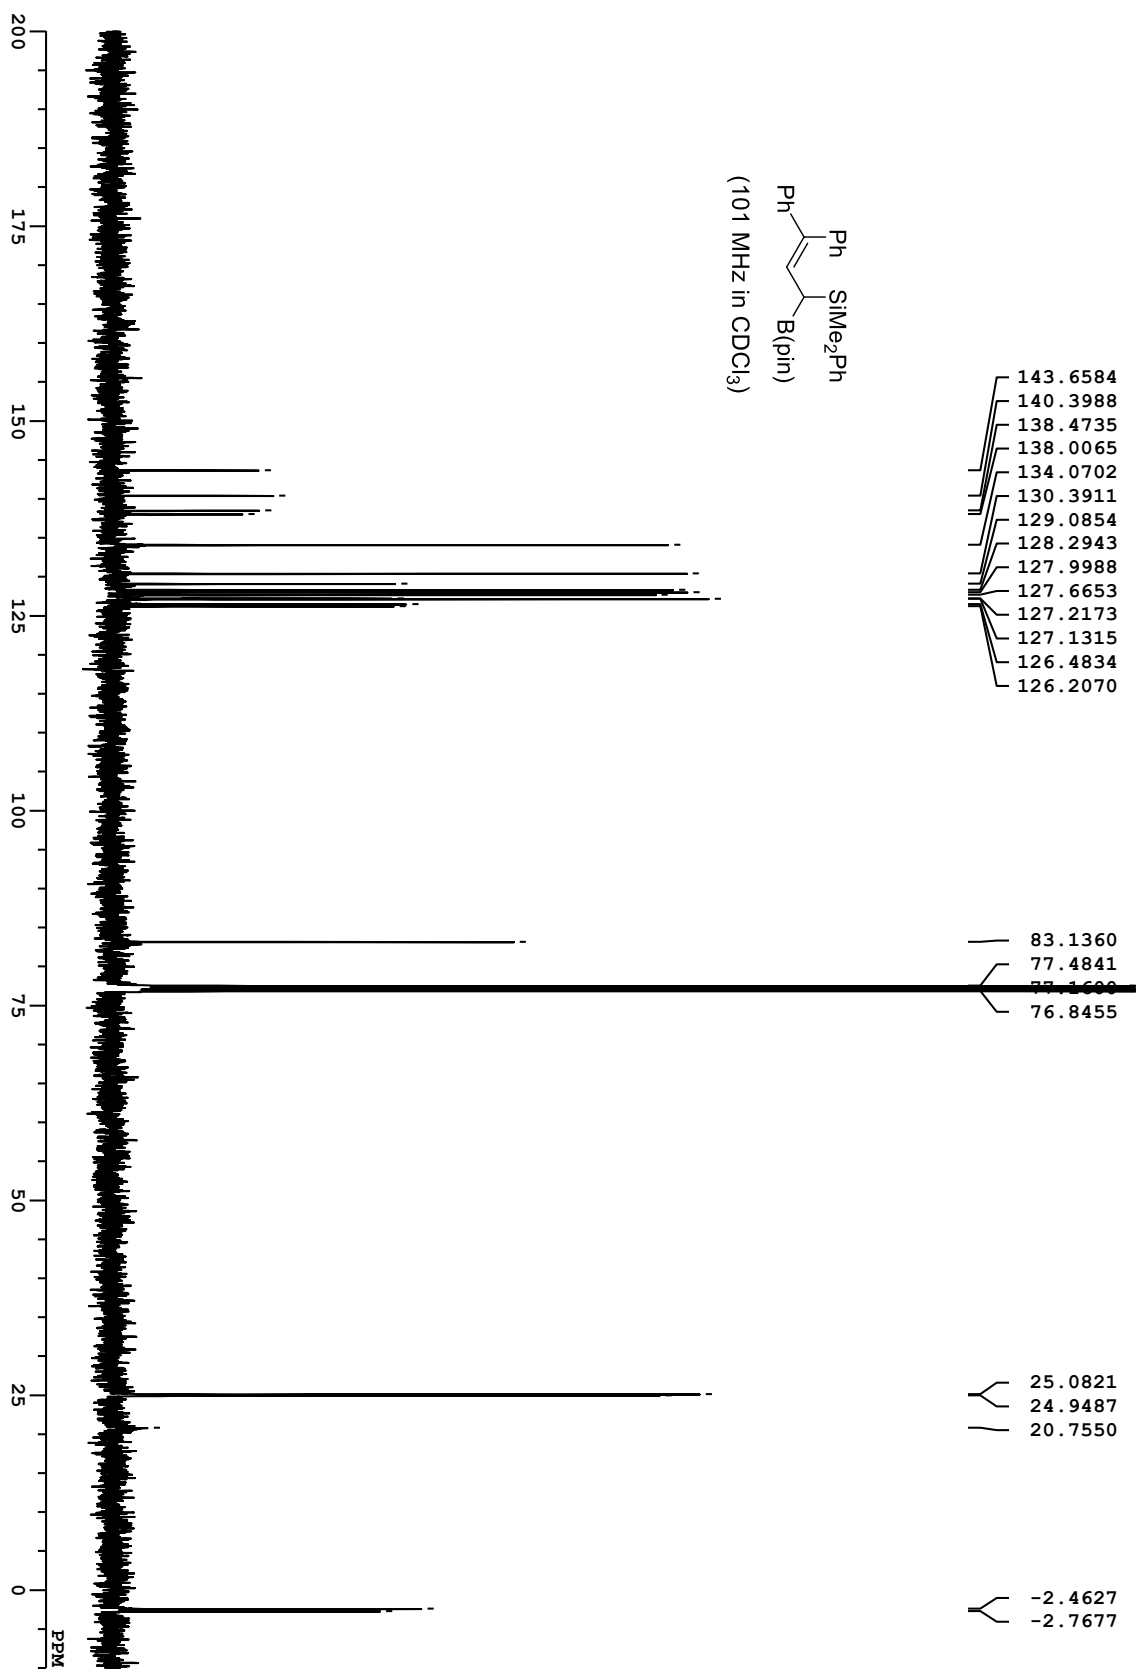

compound **3ba**

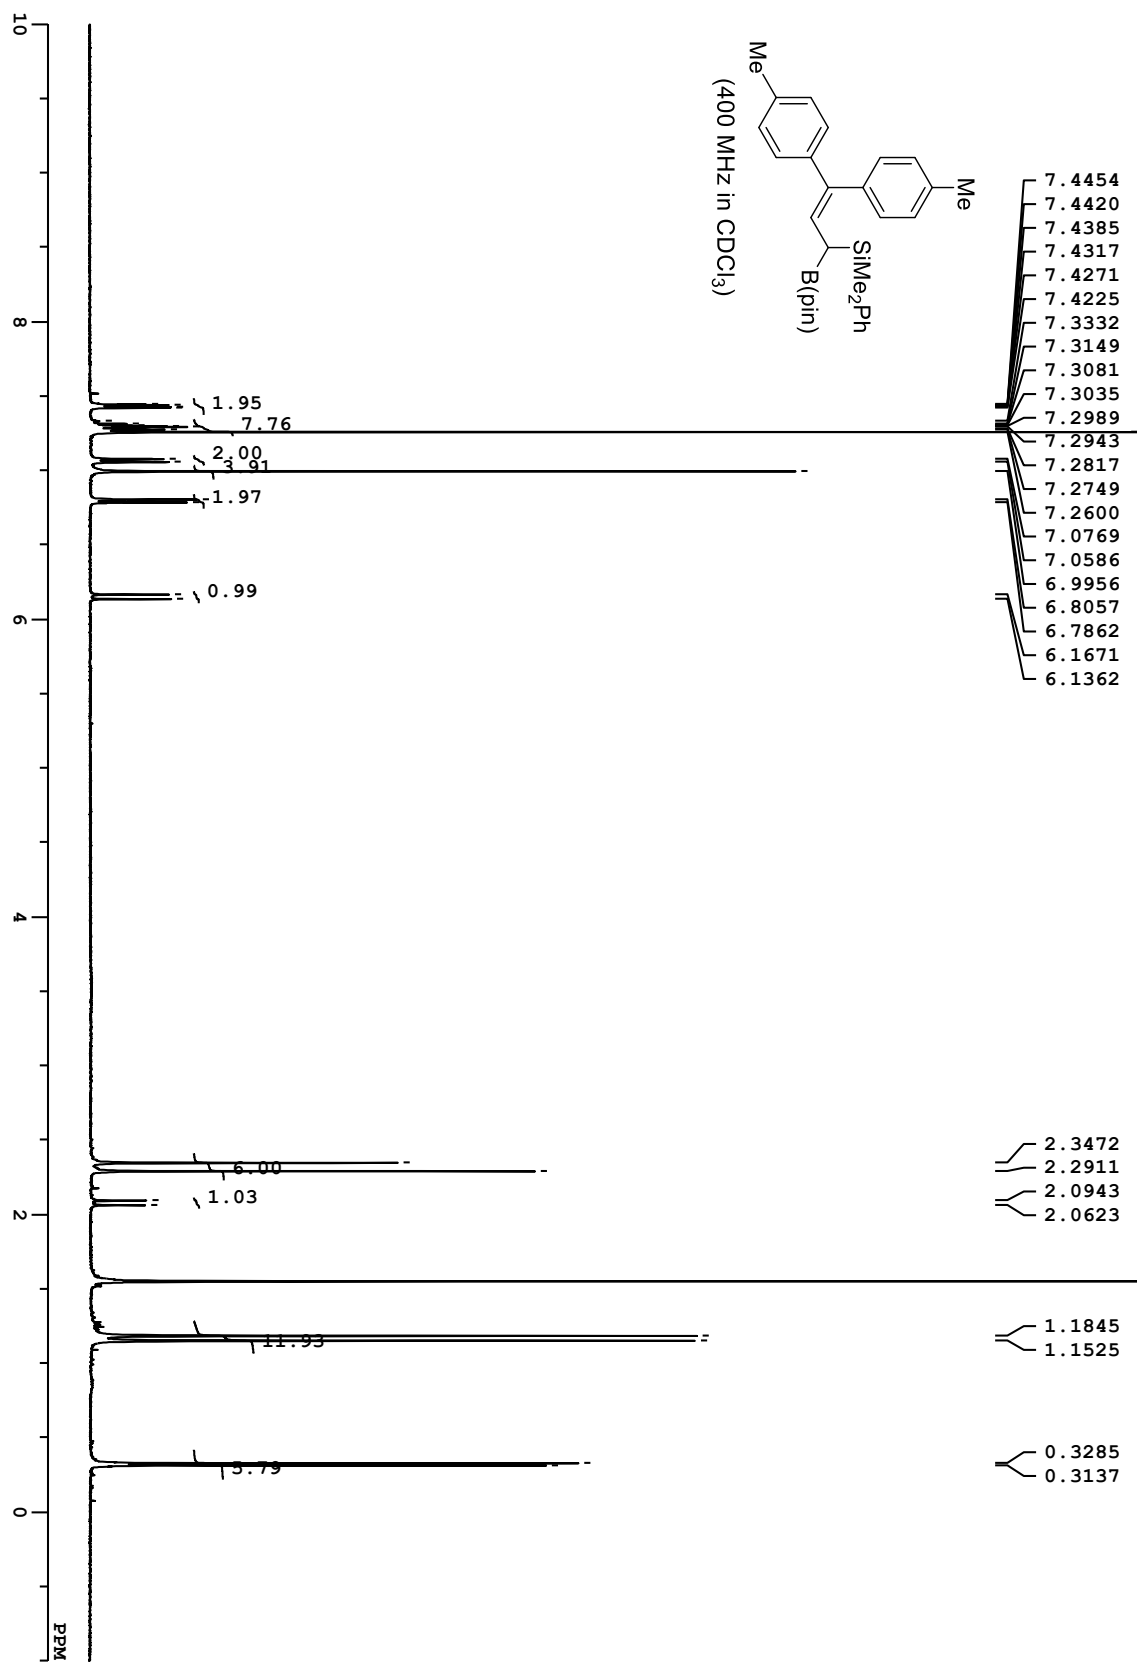

compound 3ba

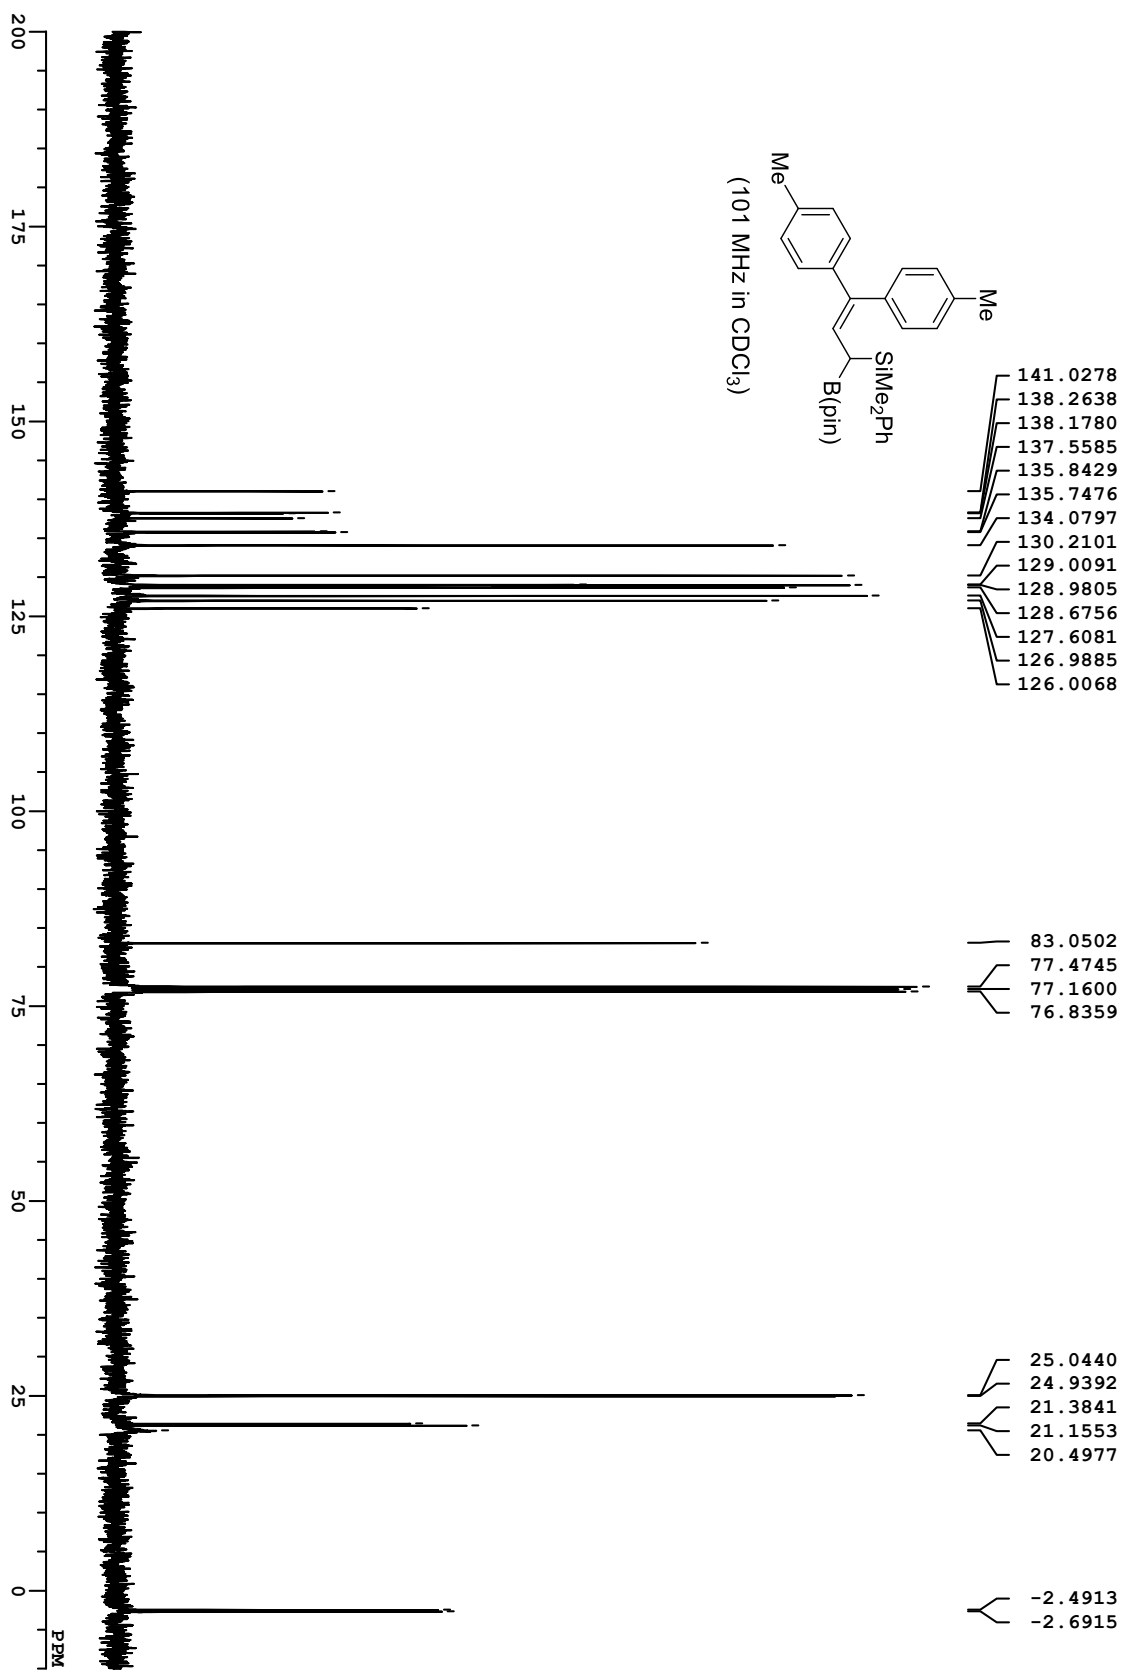

compound 3ca

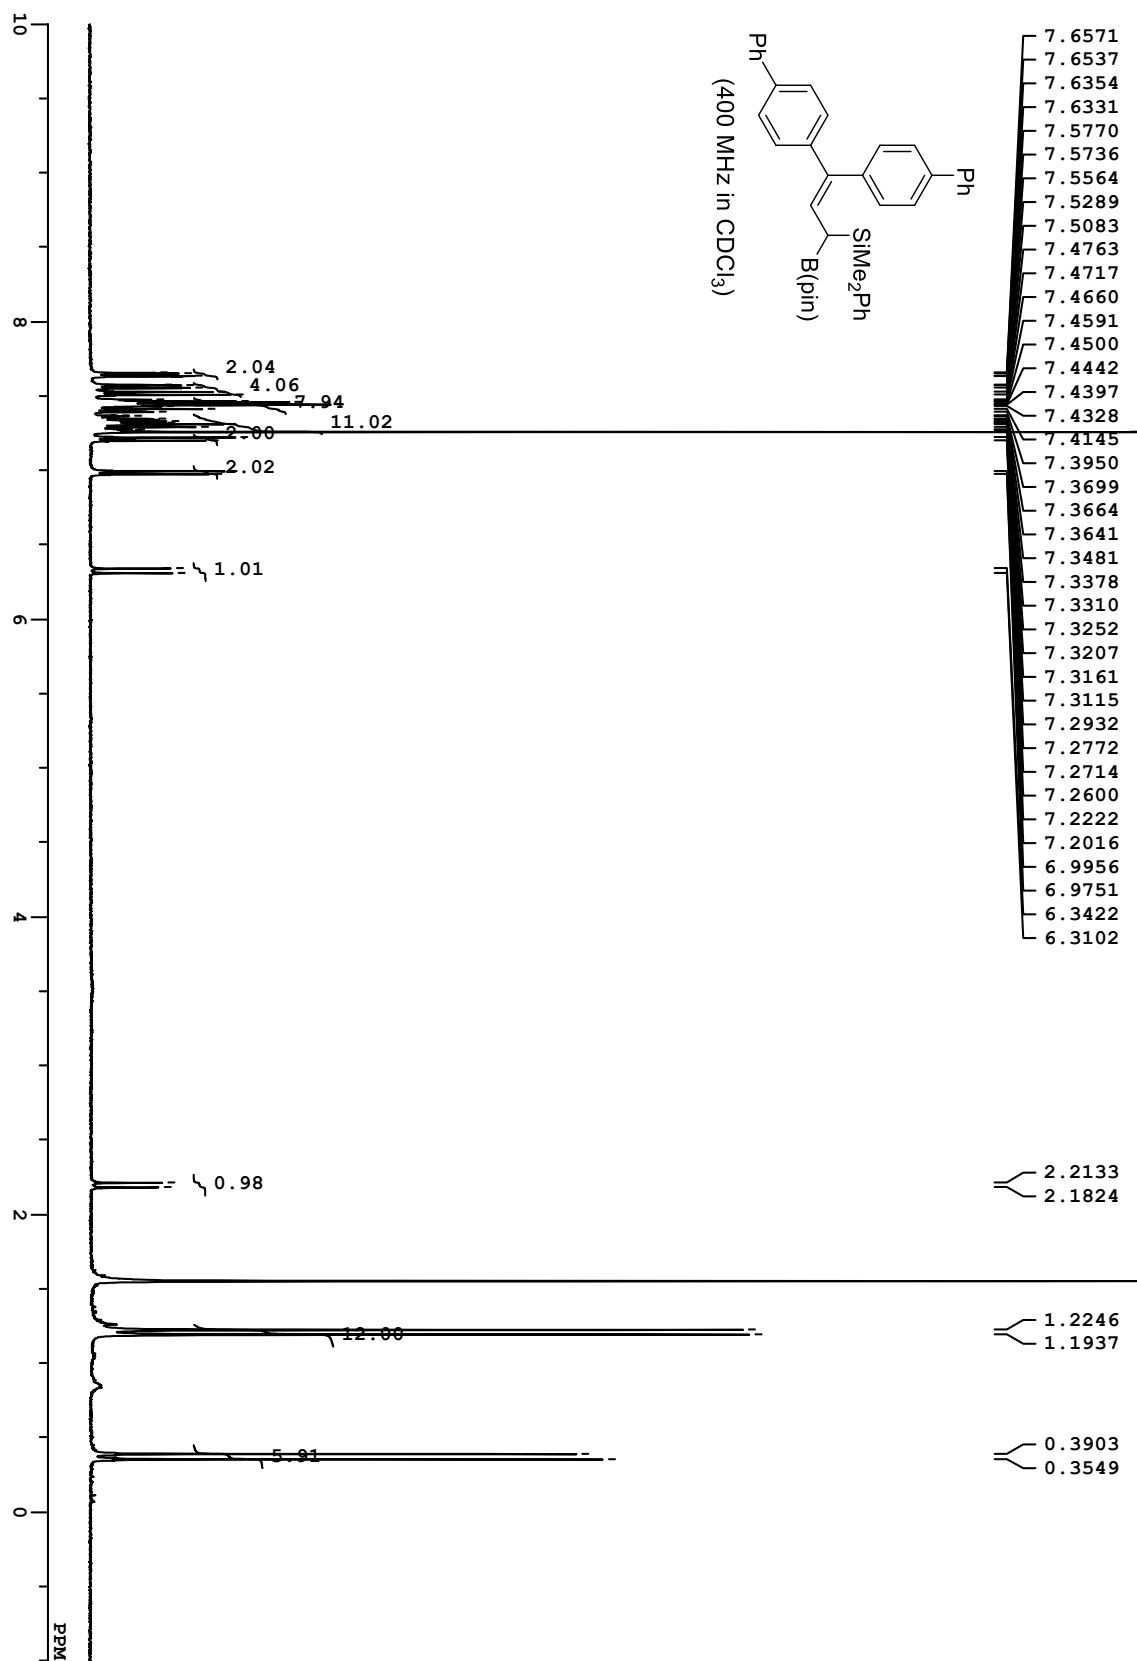

compound 3ca

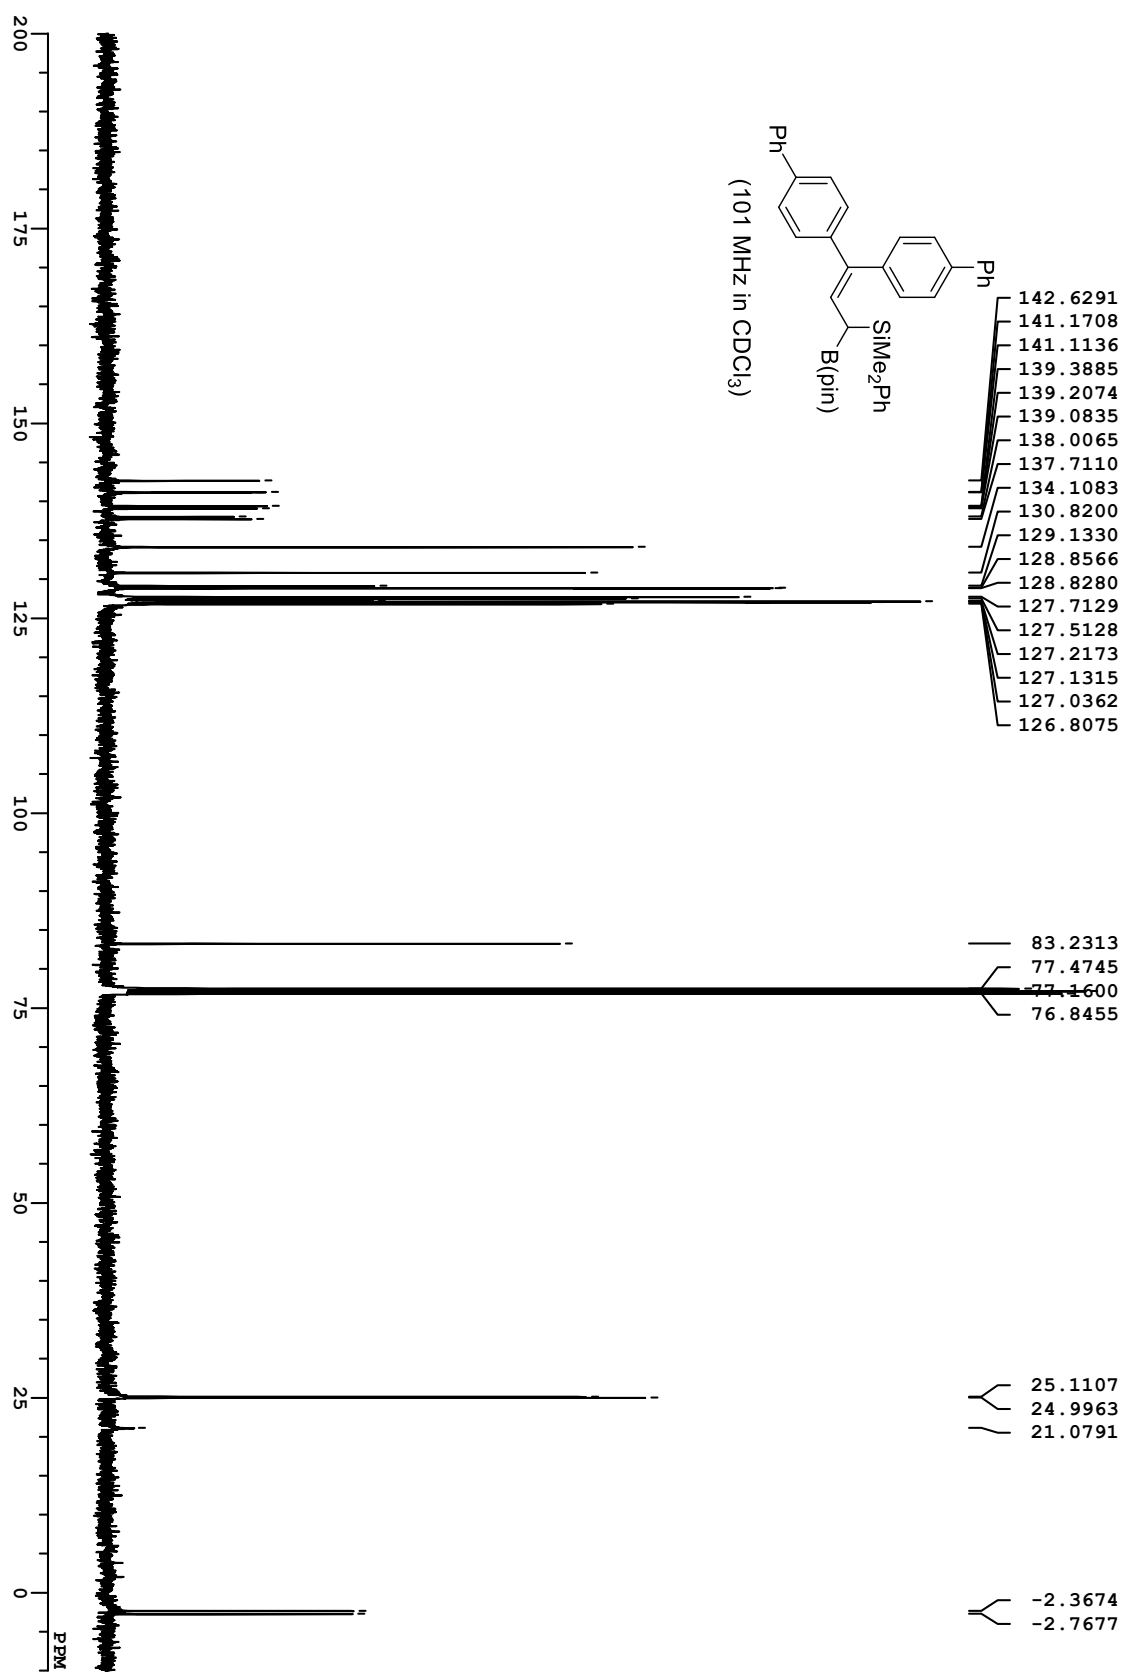

compound **3da**

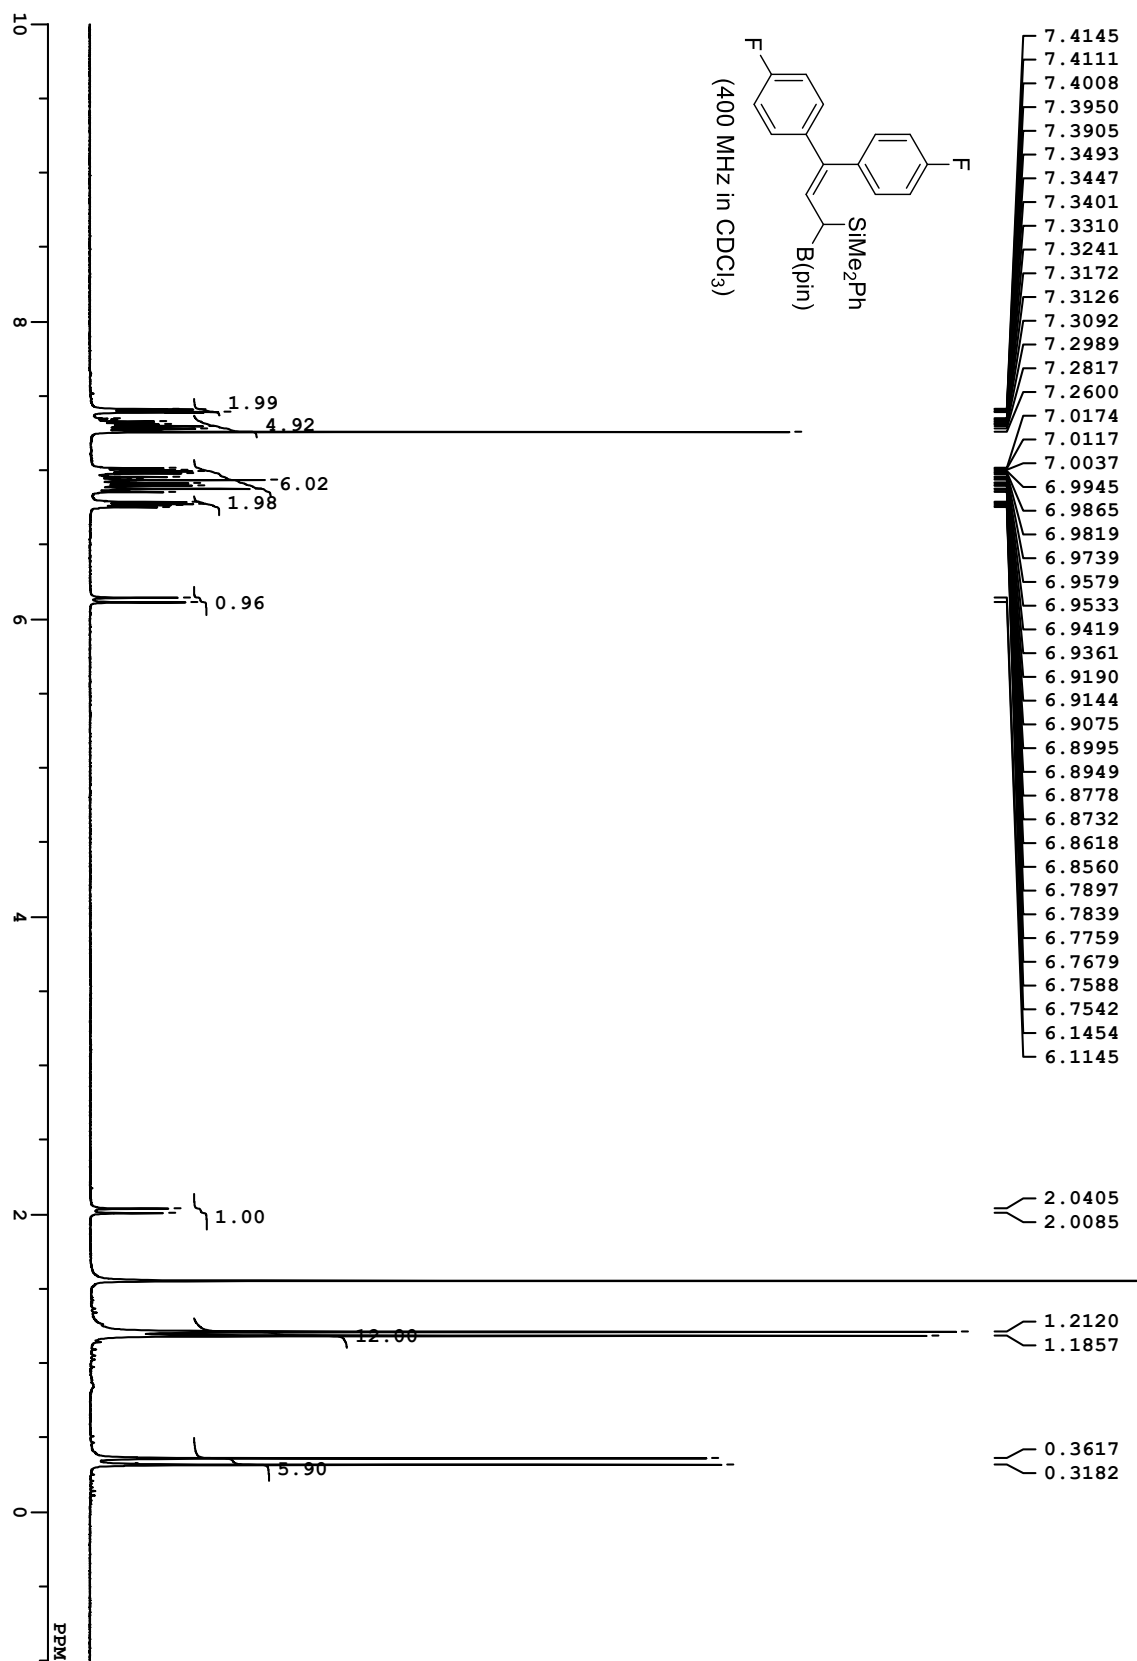

compound 3da

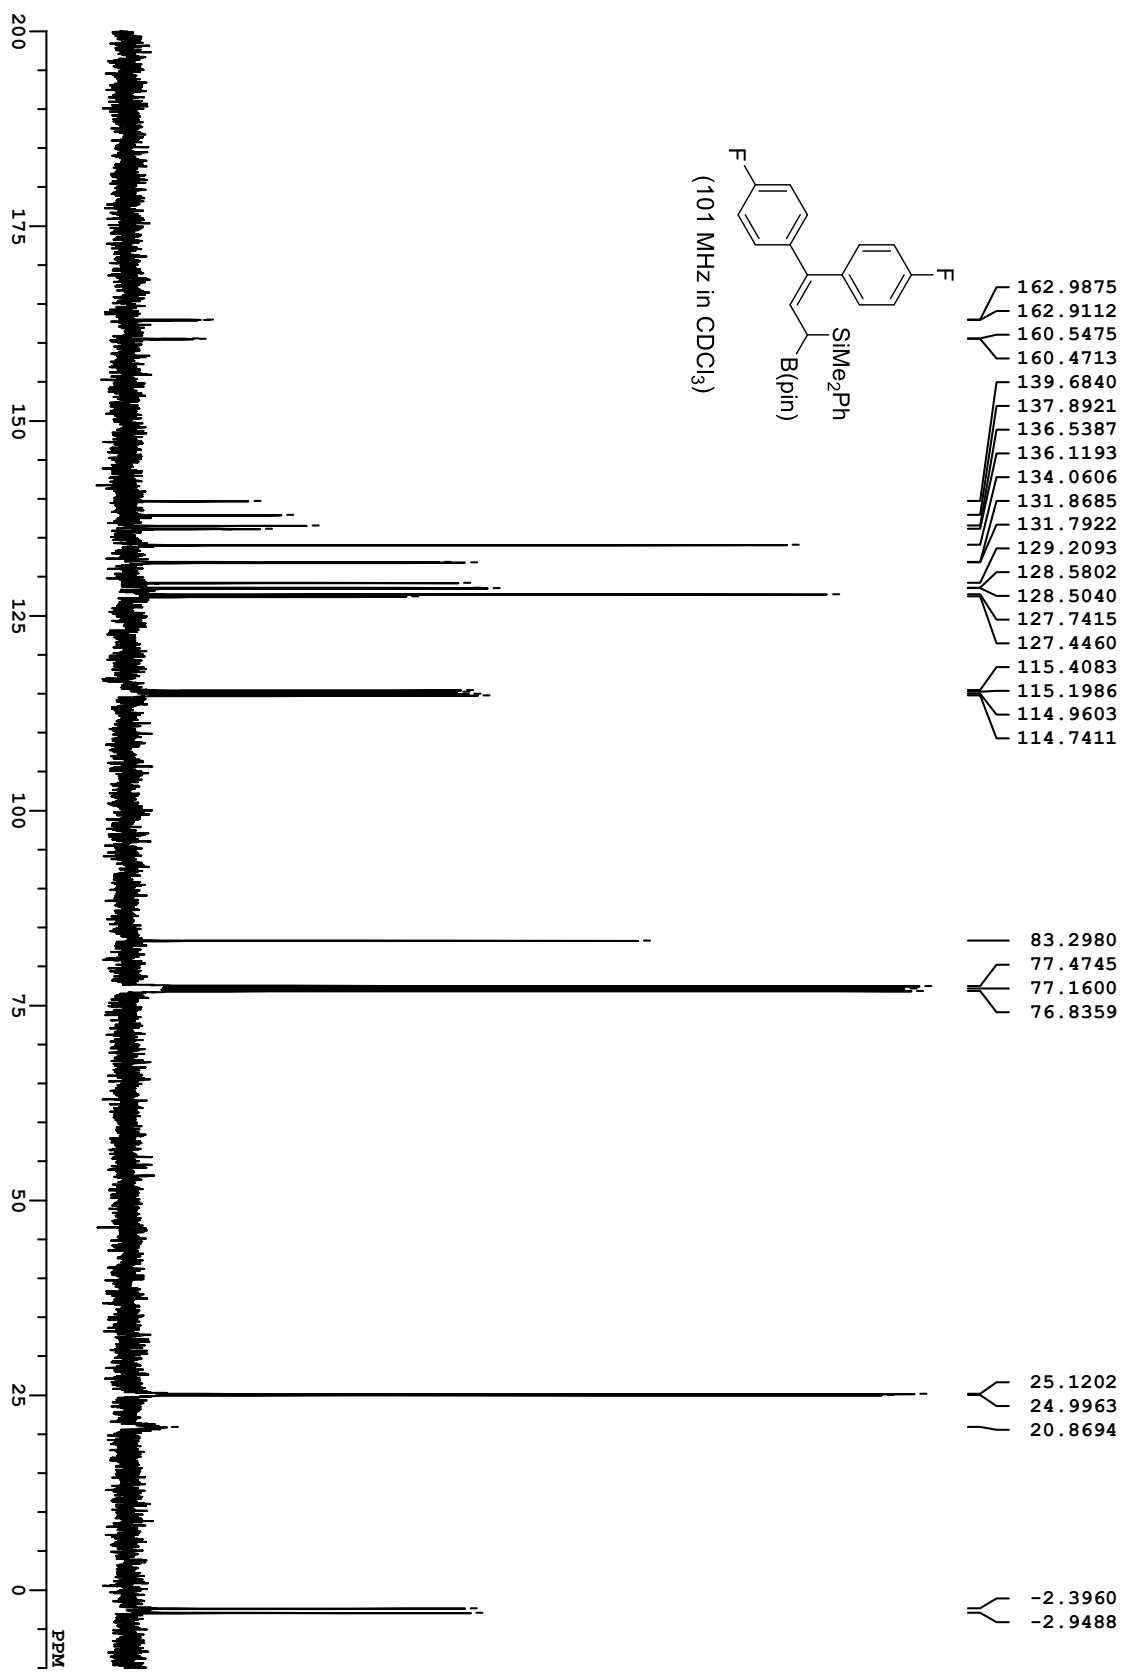



compound **3ea**

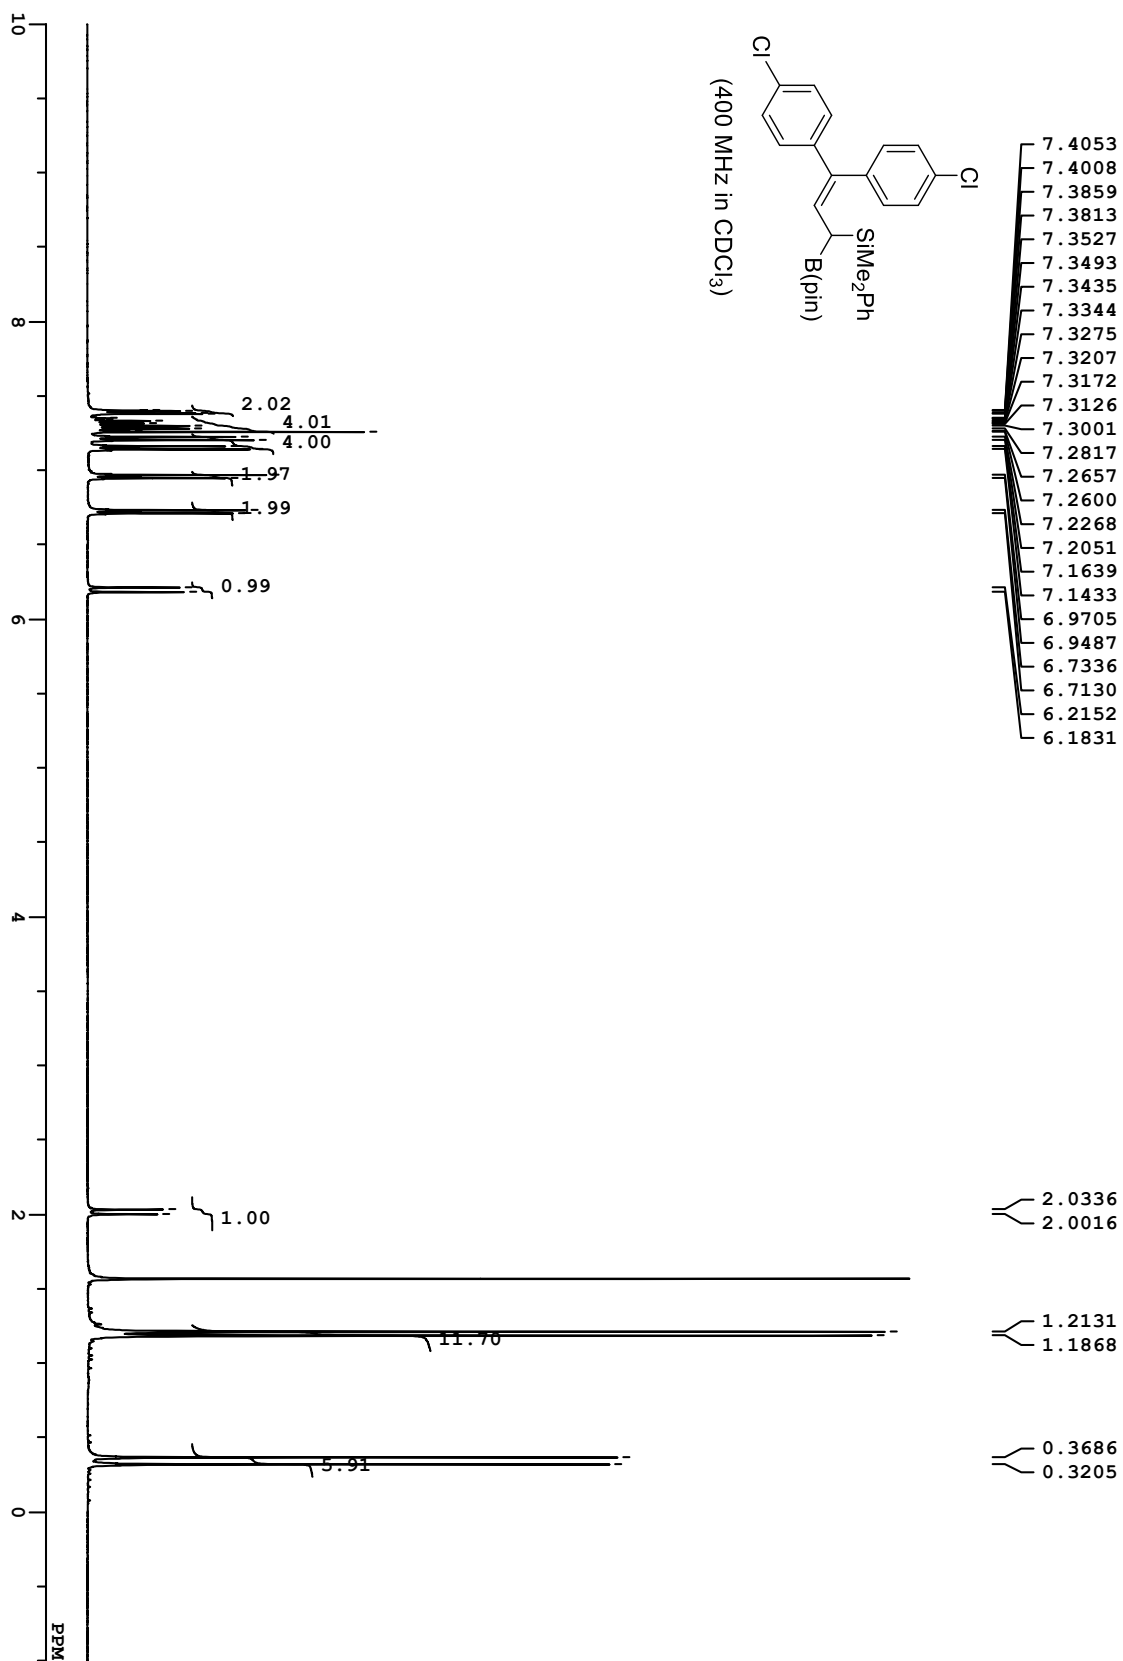

compound 3ea

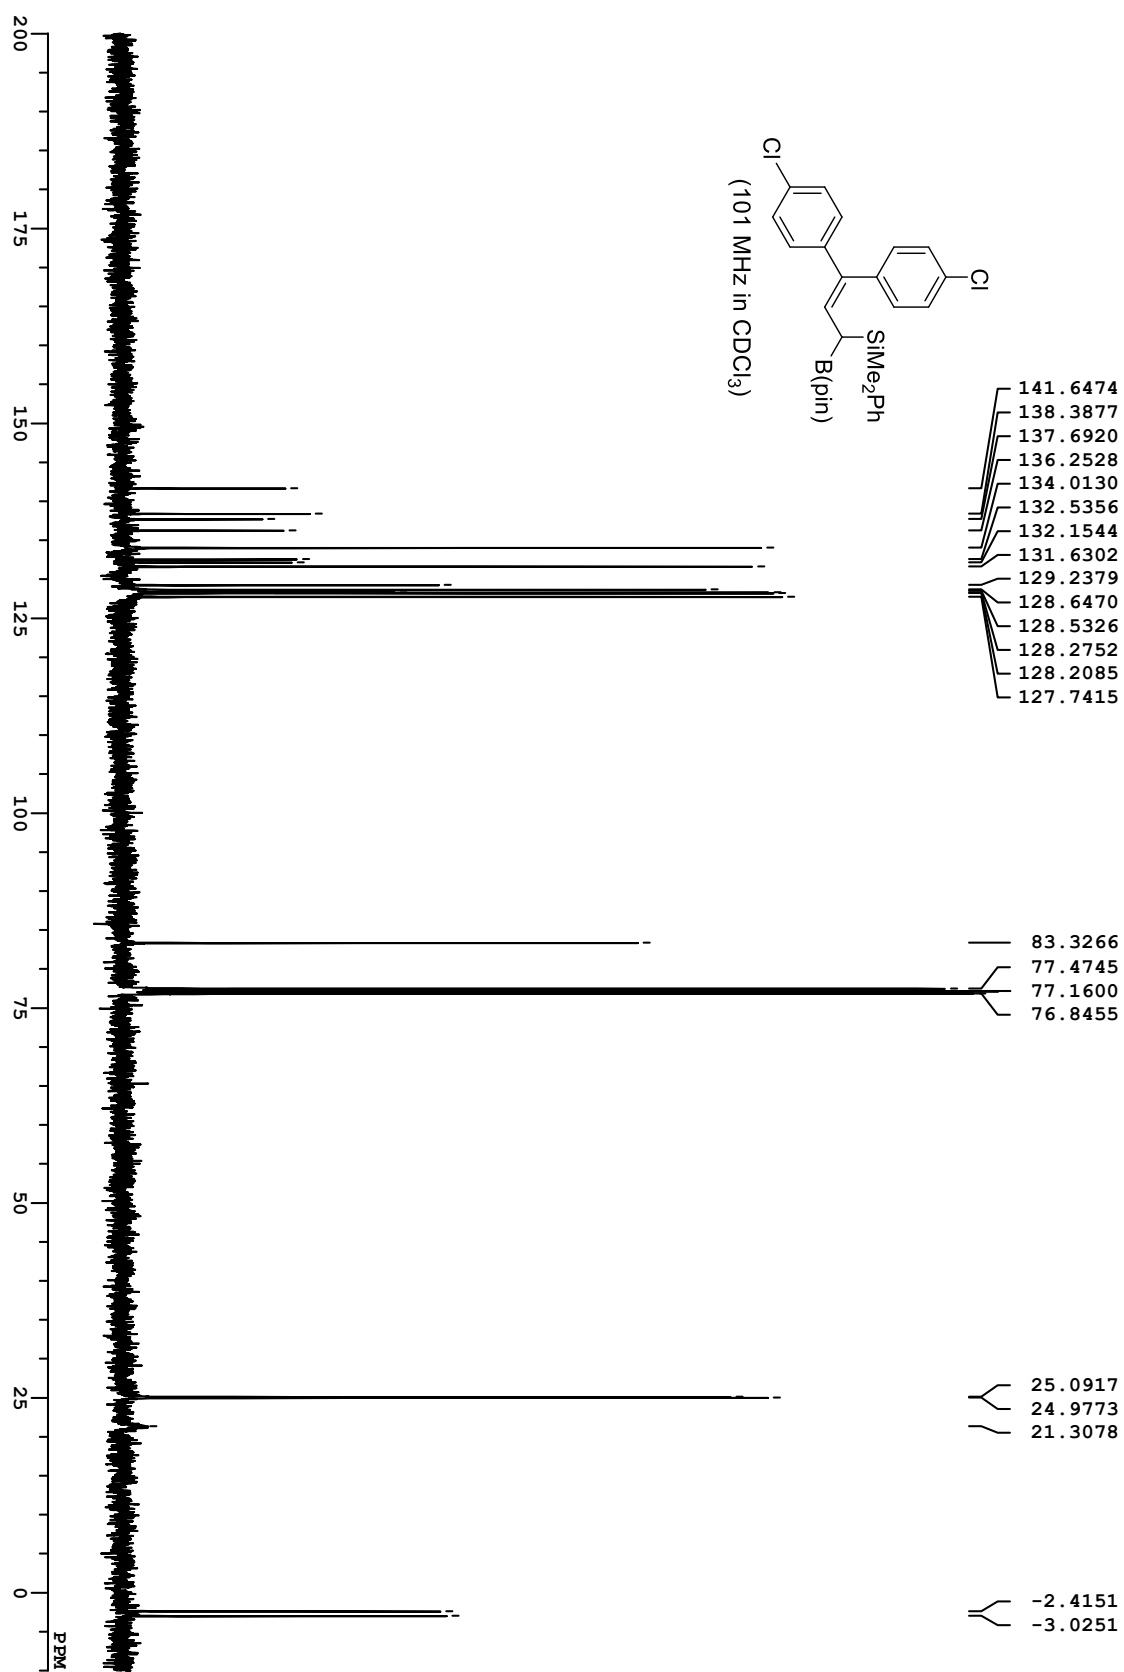

compound **3fa**

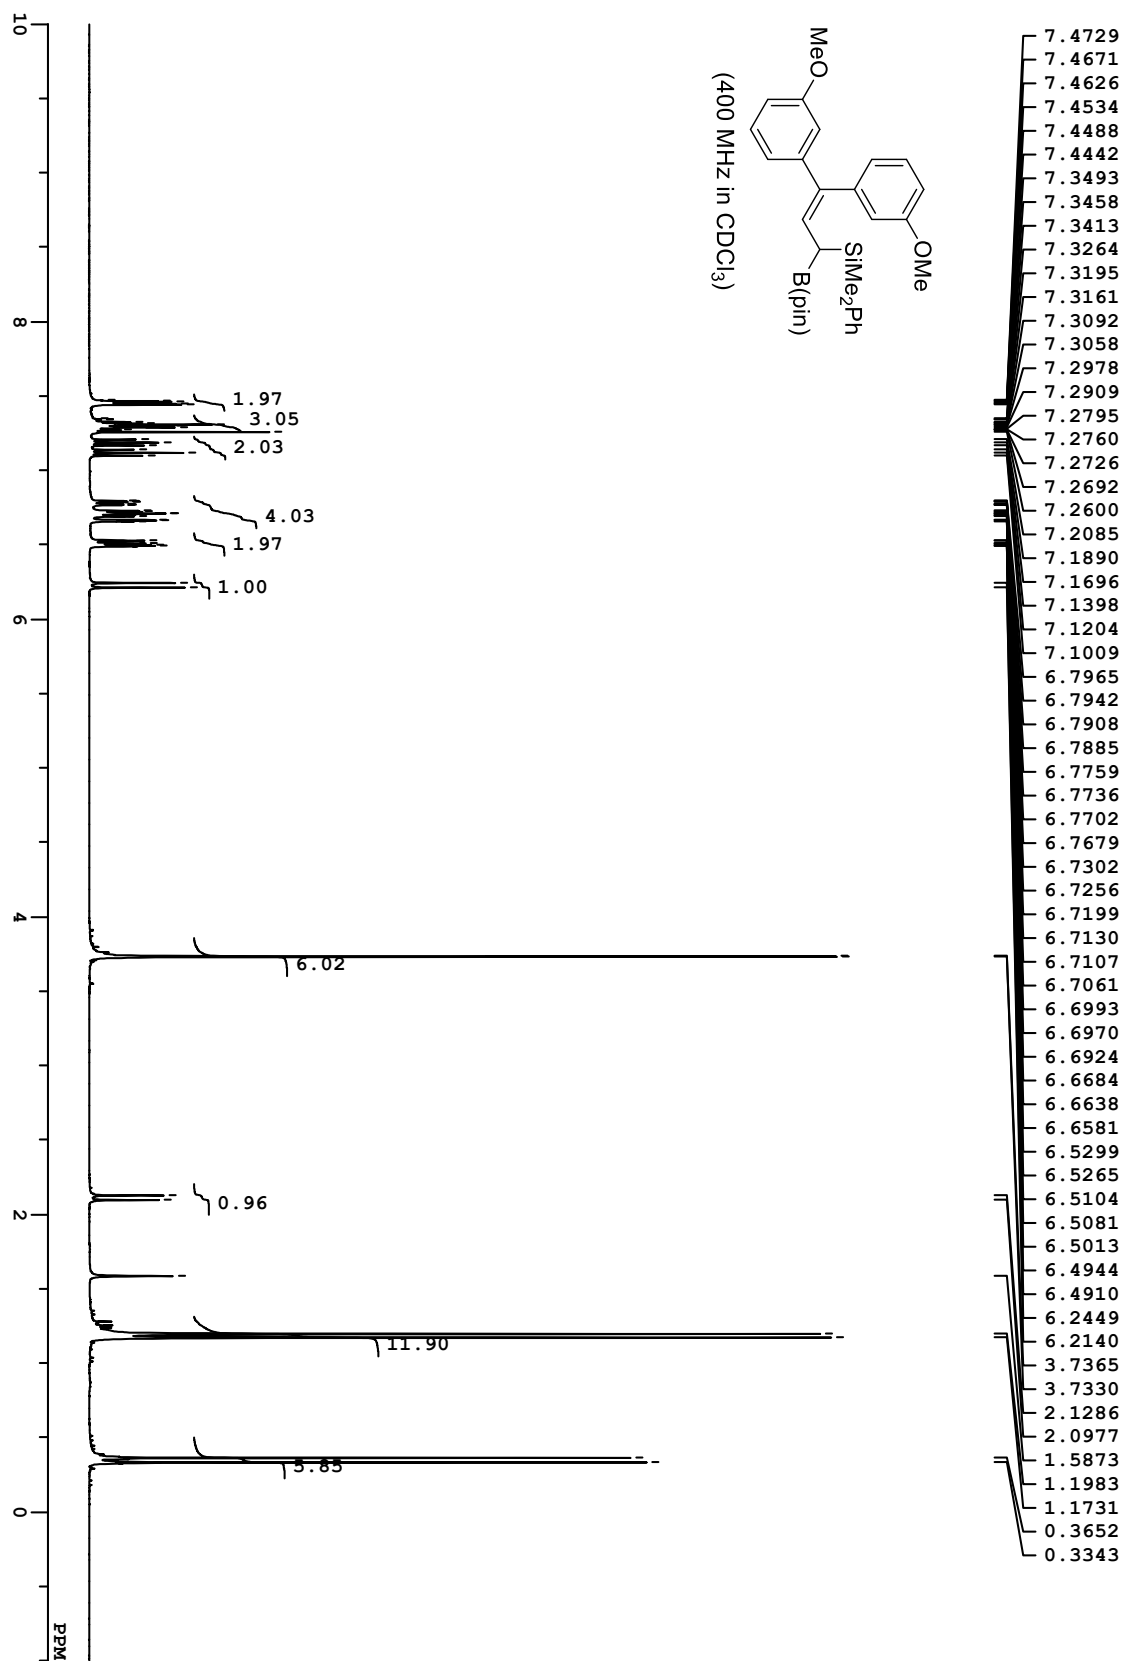

compound 3fa

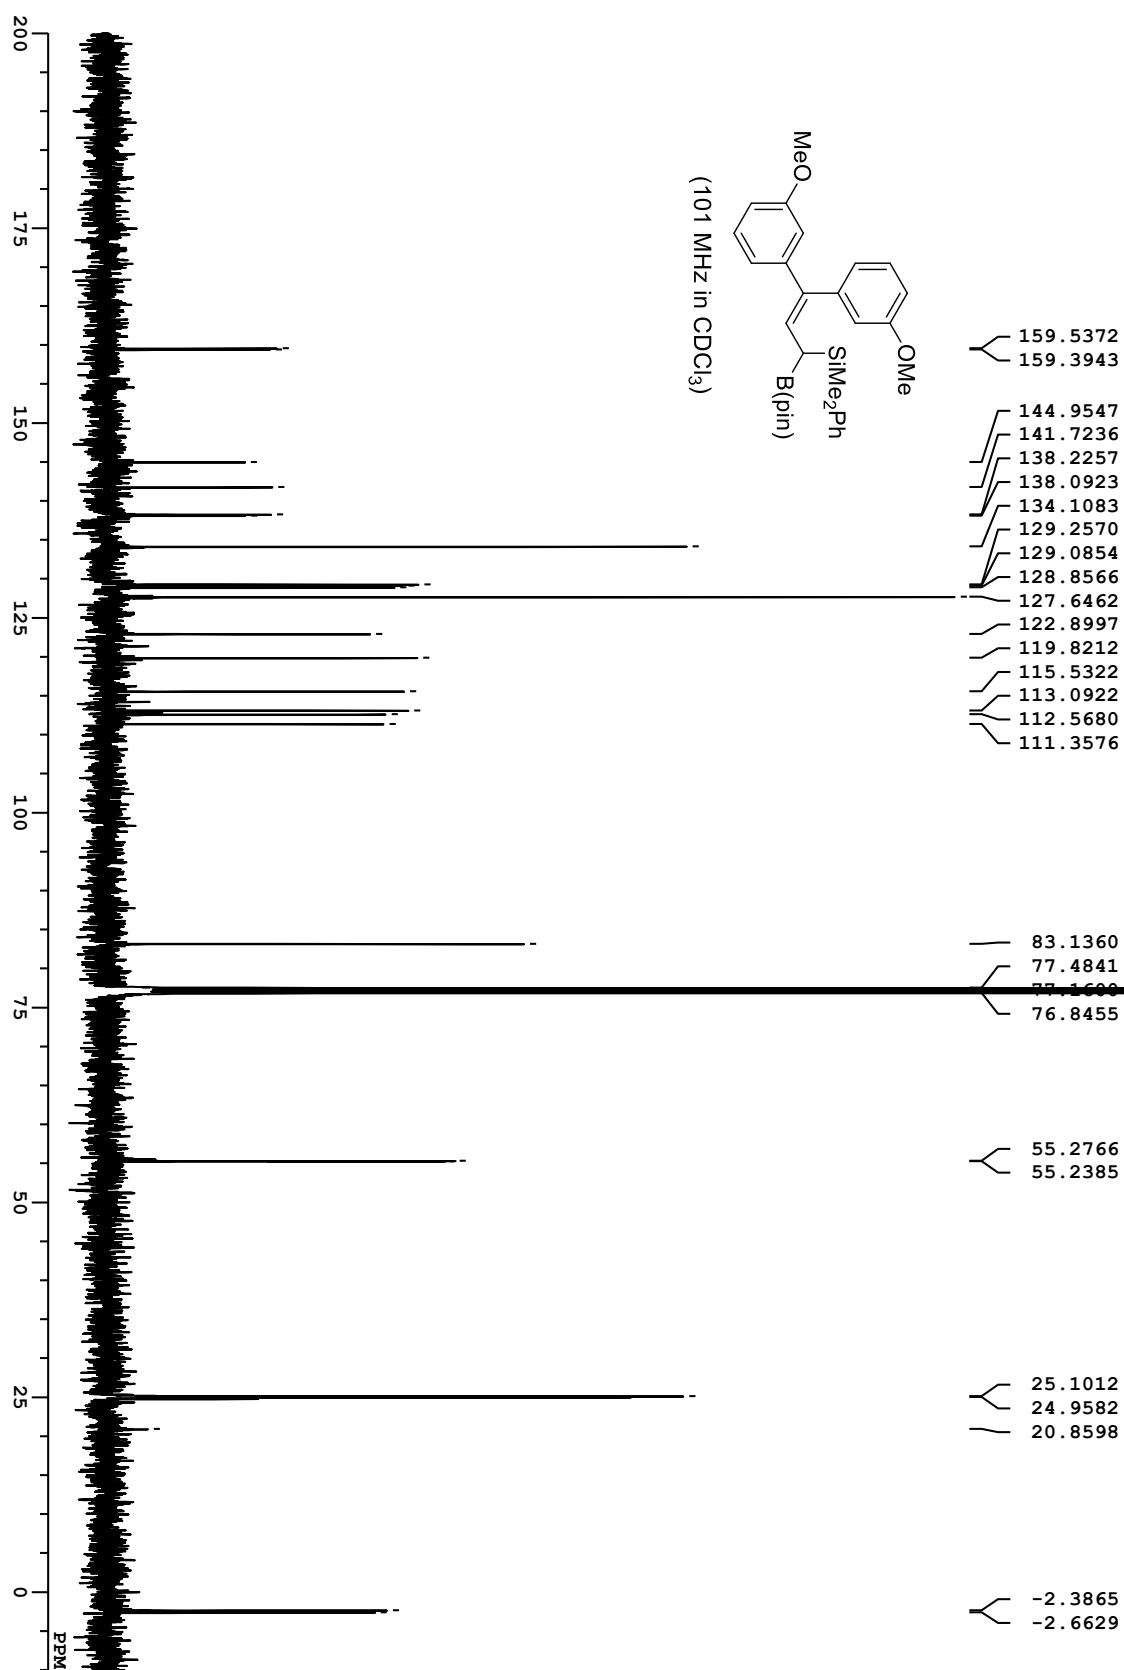

compound 3ga

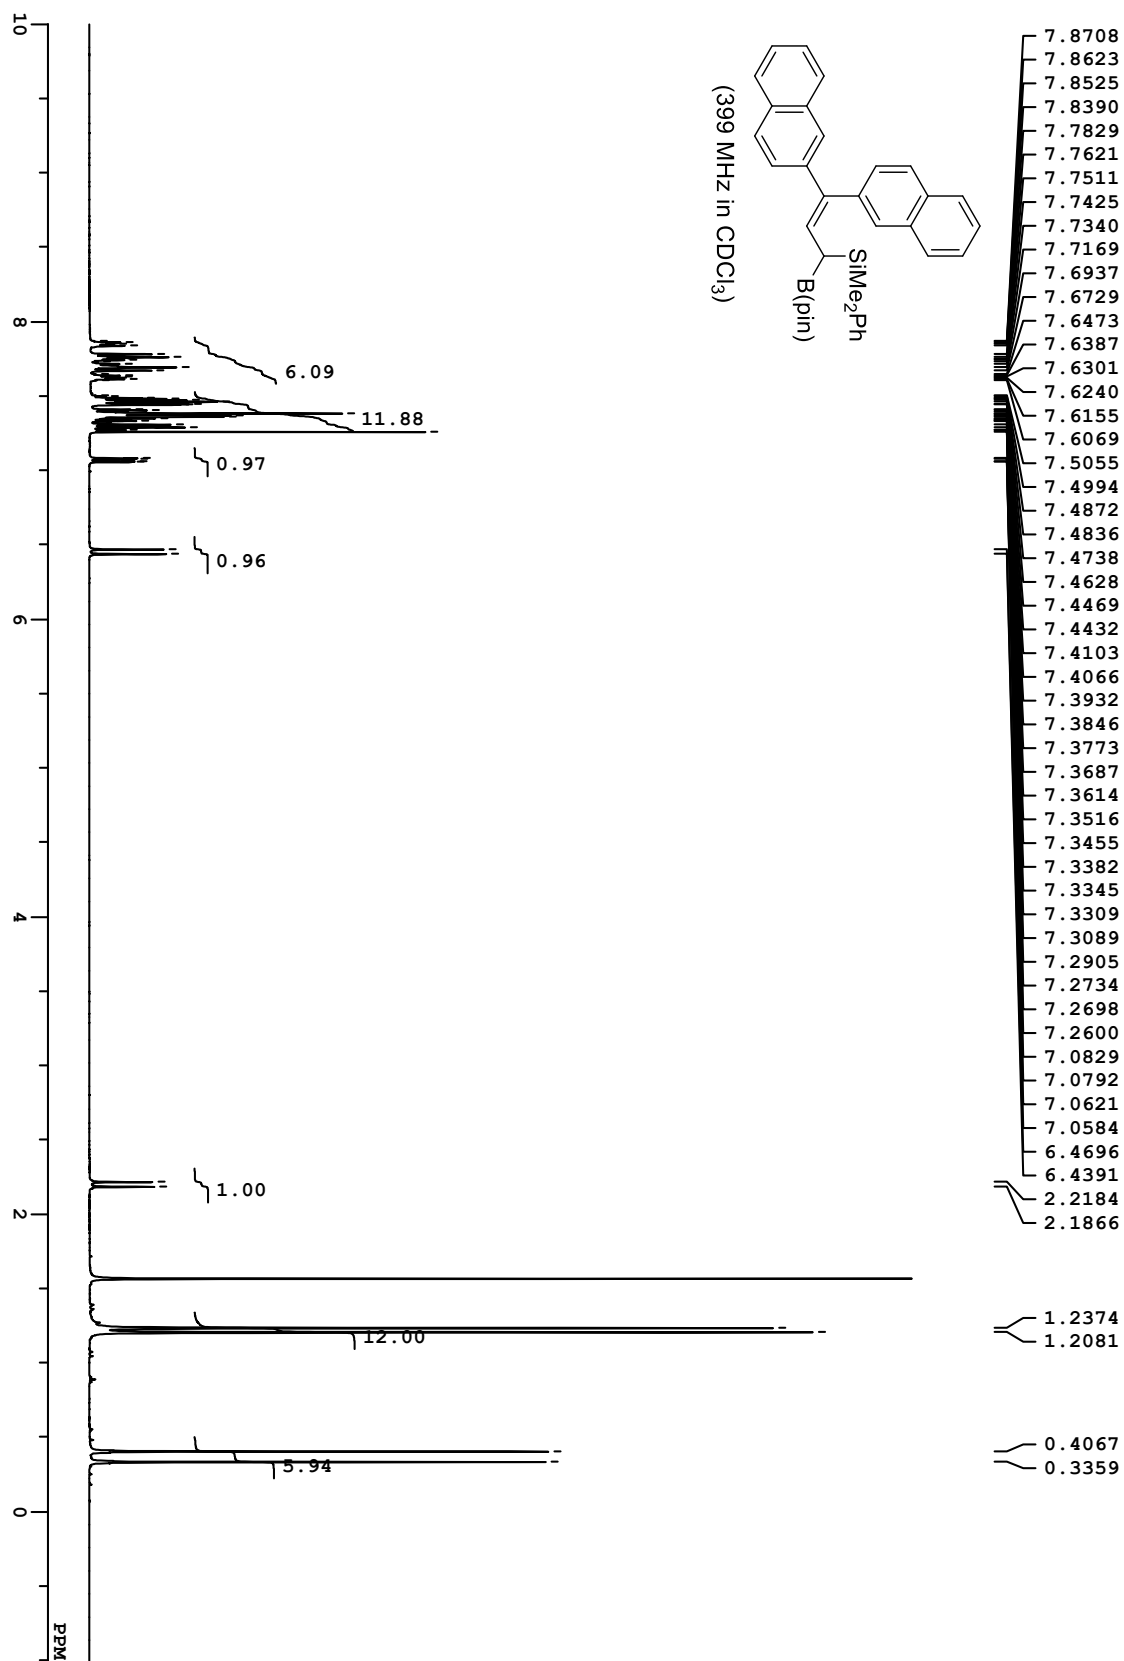

compound 3ga

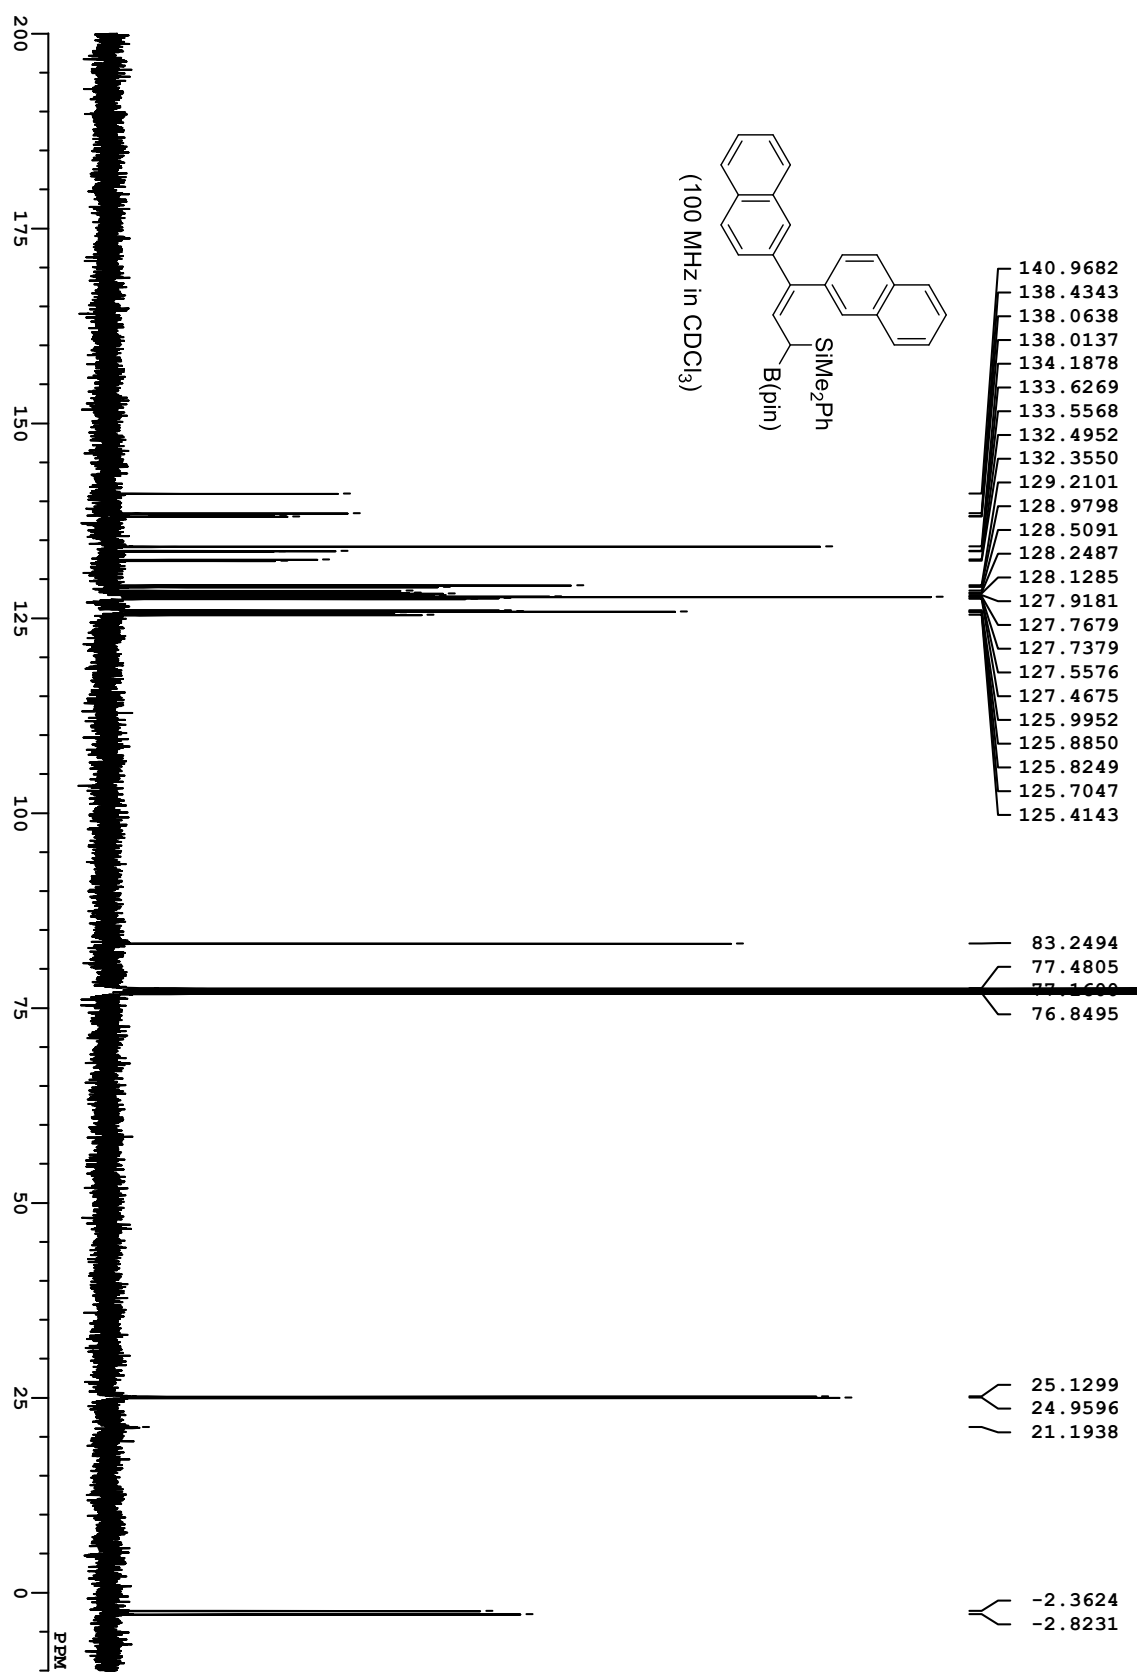

compound **3ha** (dr = 52/48)

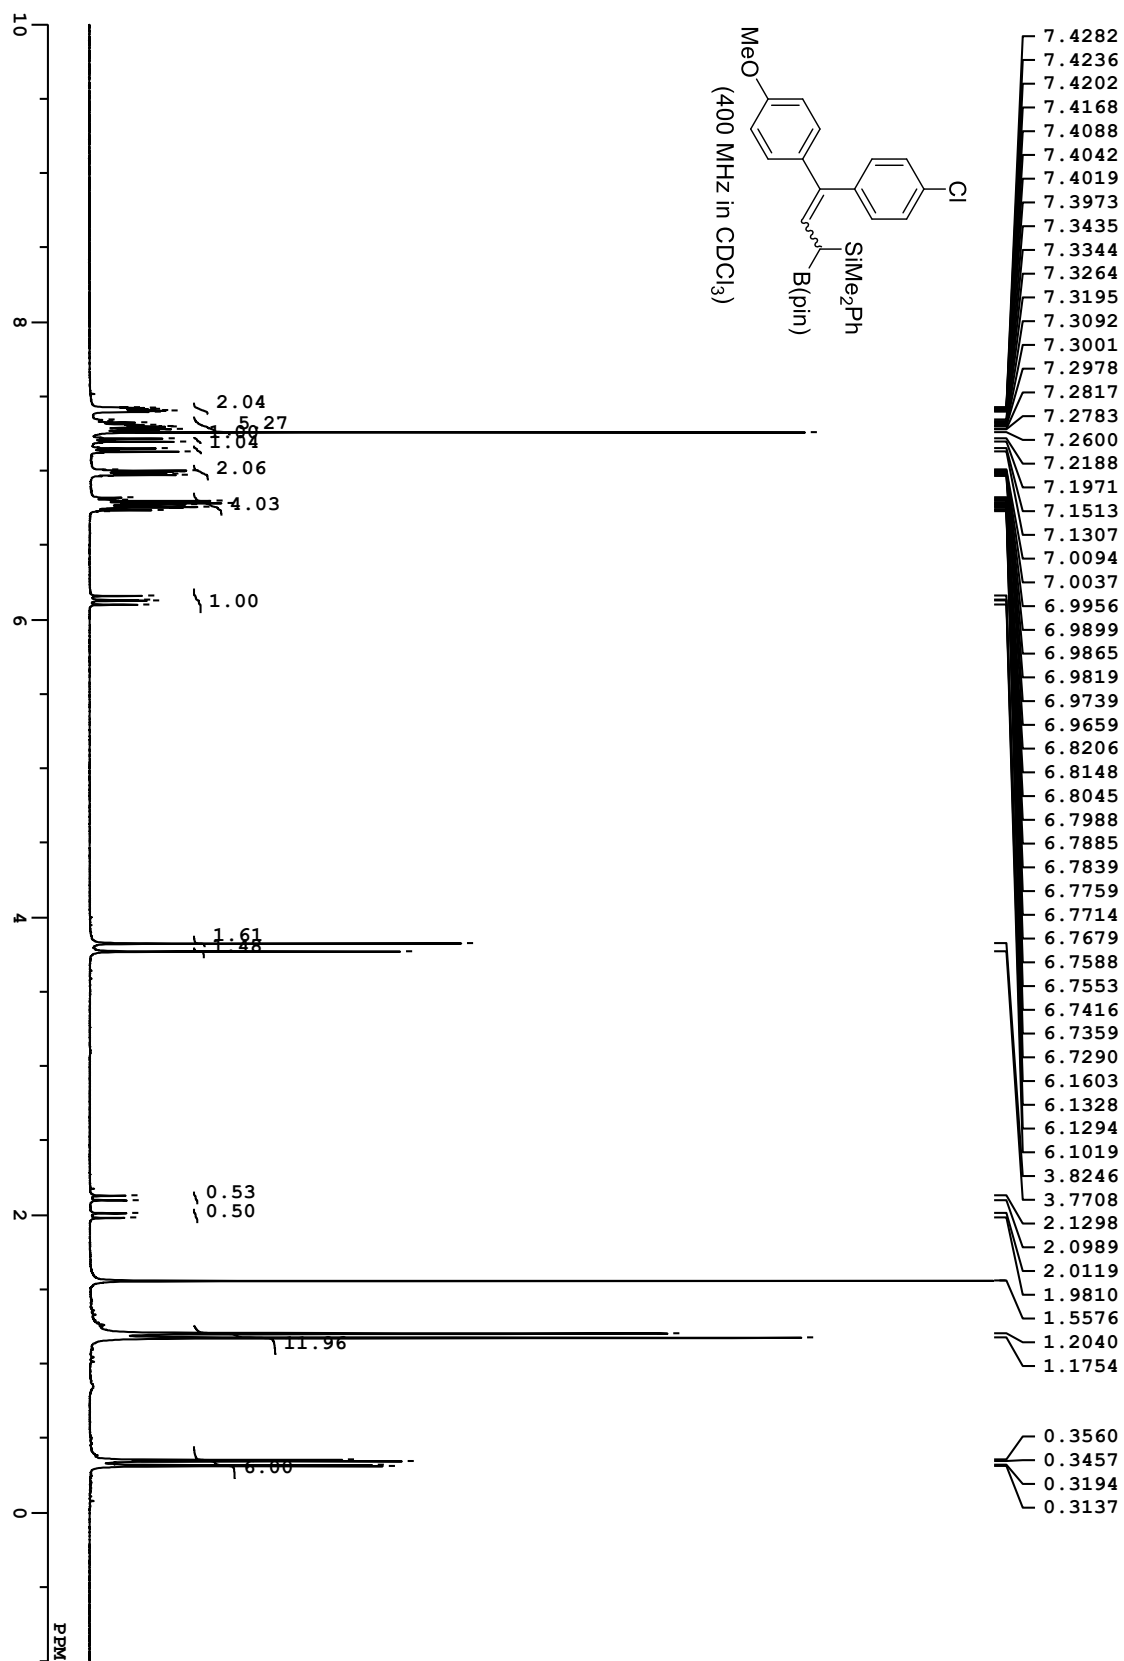

compound **3ha** (dr = 52/48)

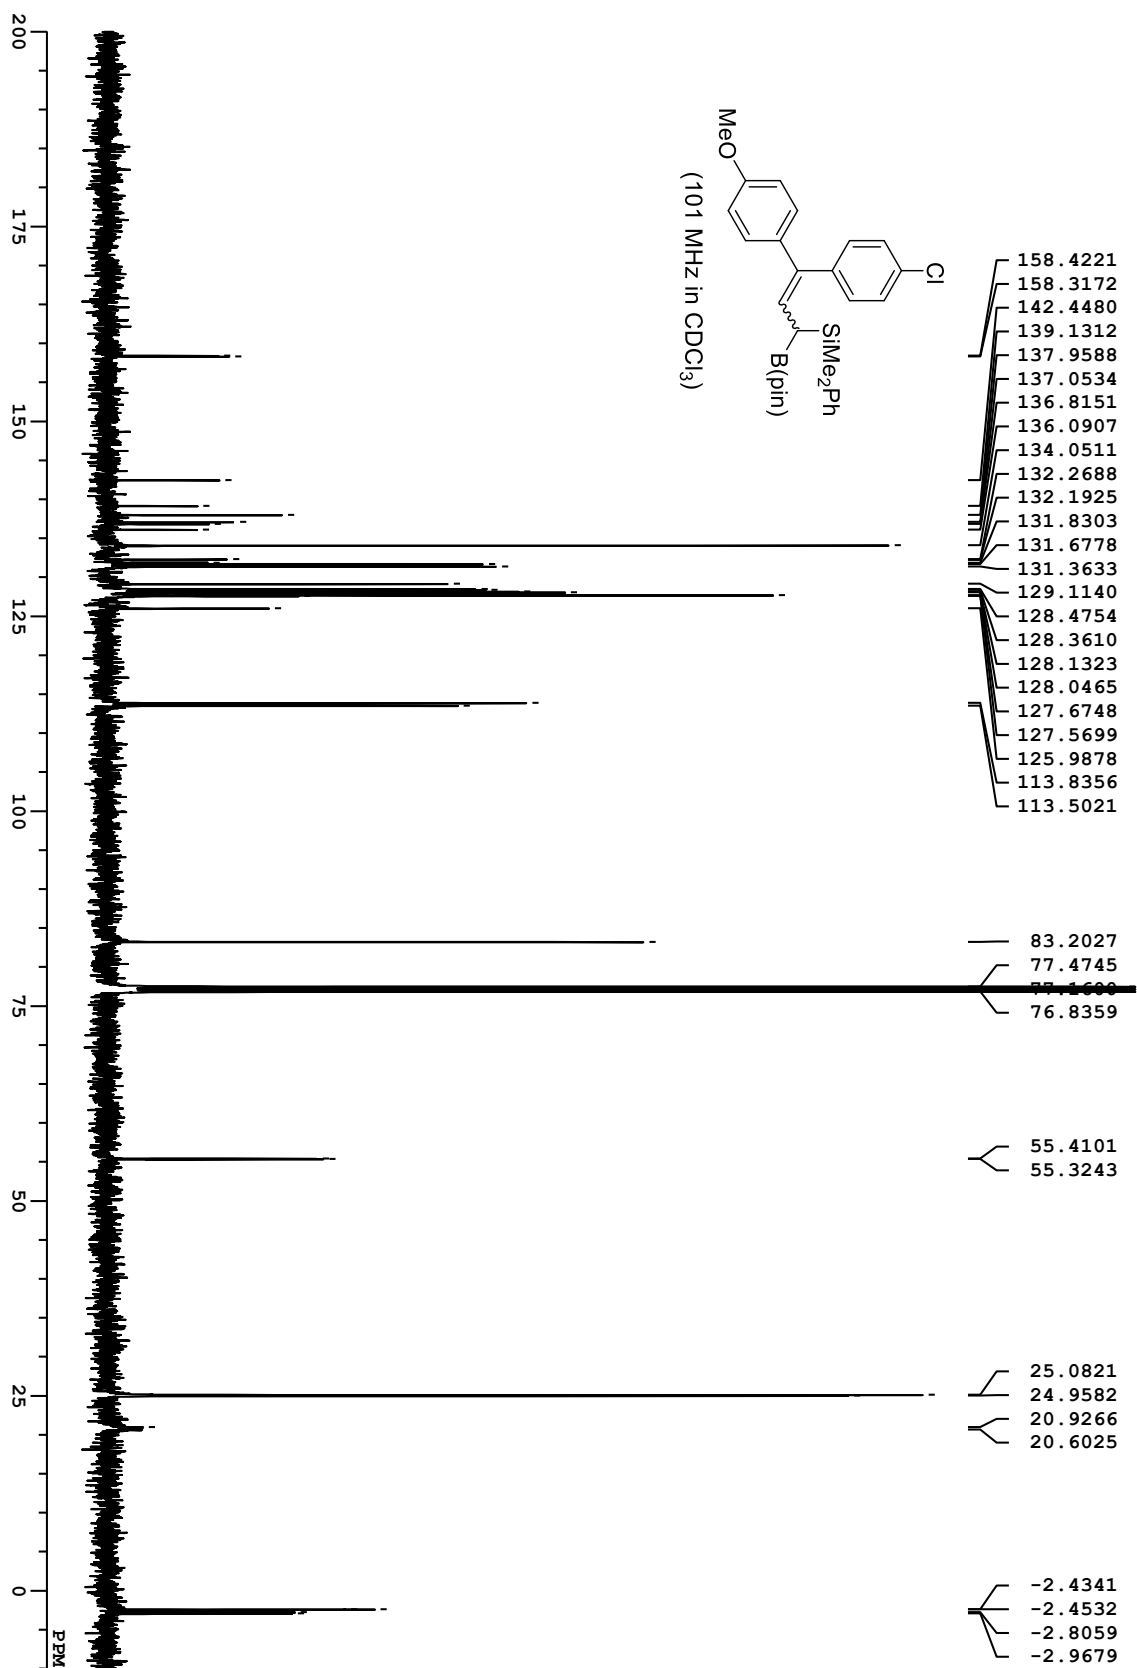



compound **3ia** (dr = 84/16)

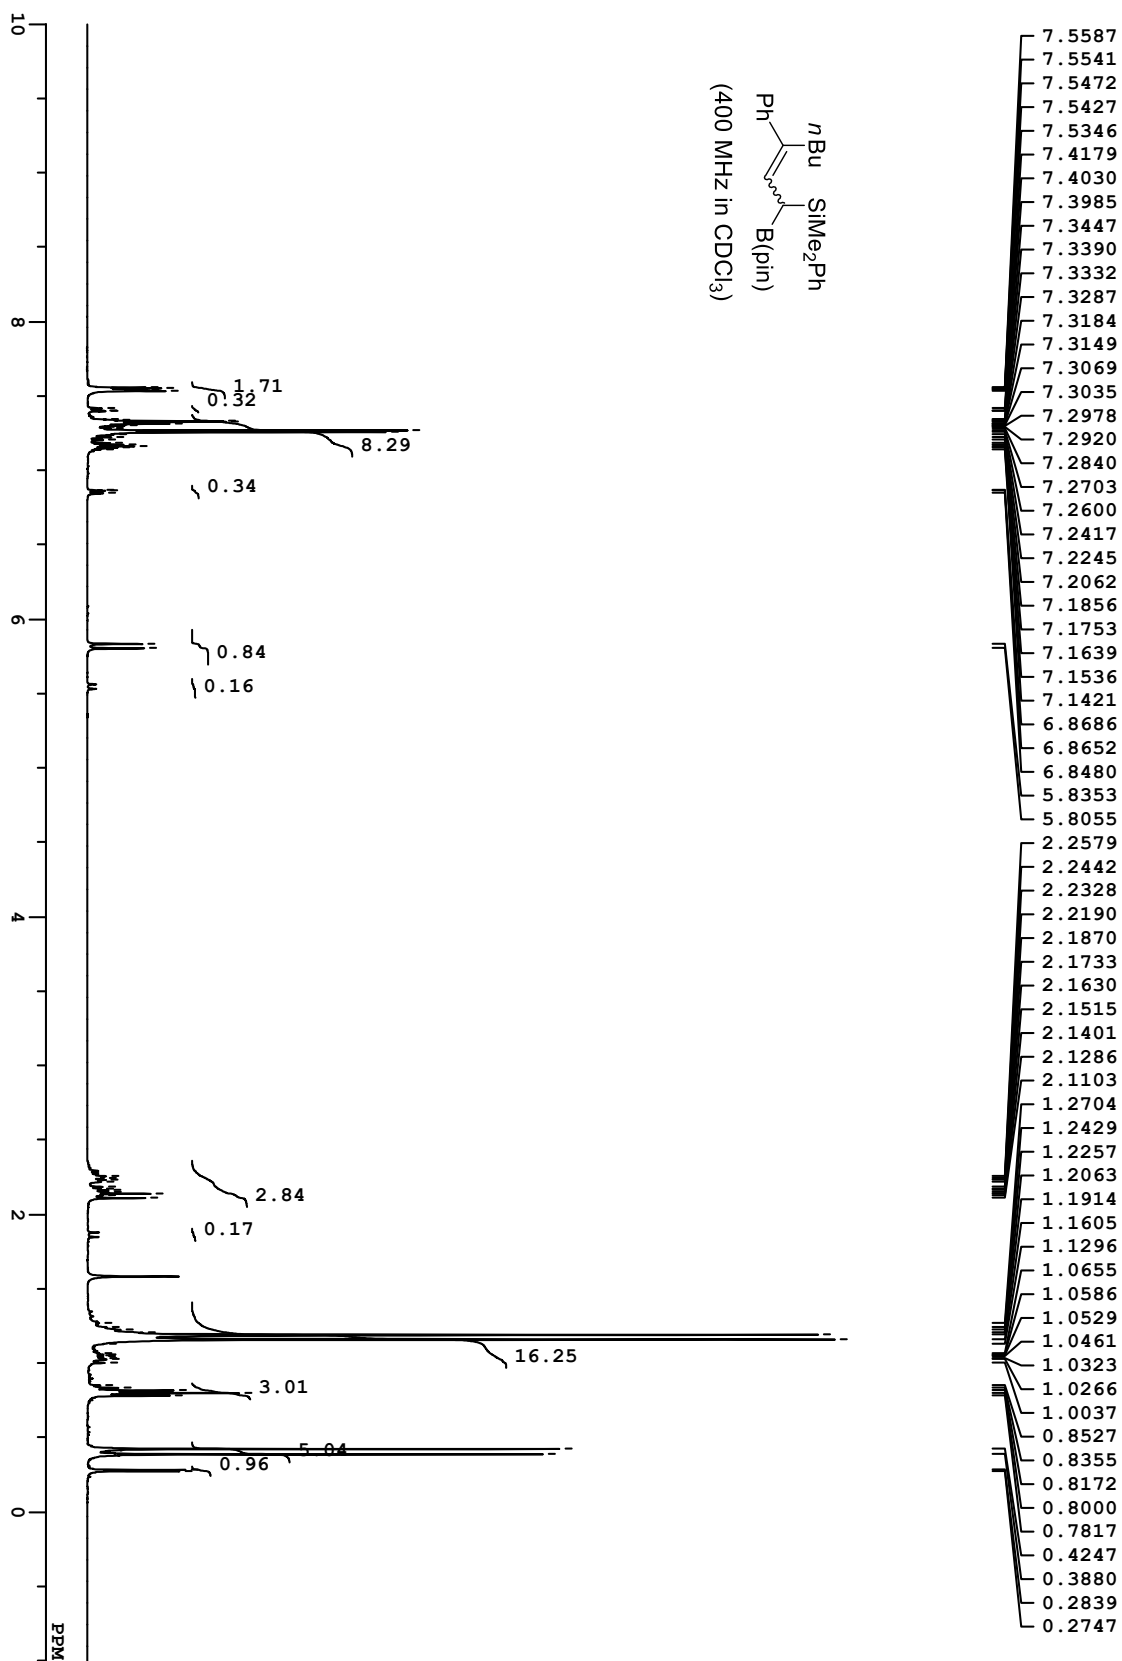

compound **3ia** (dr = 84/16)

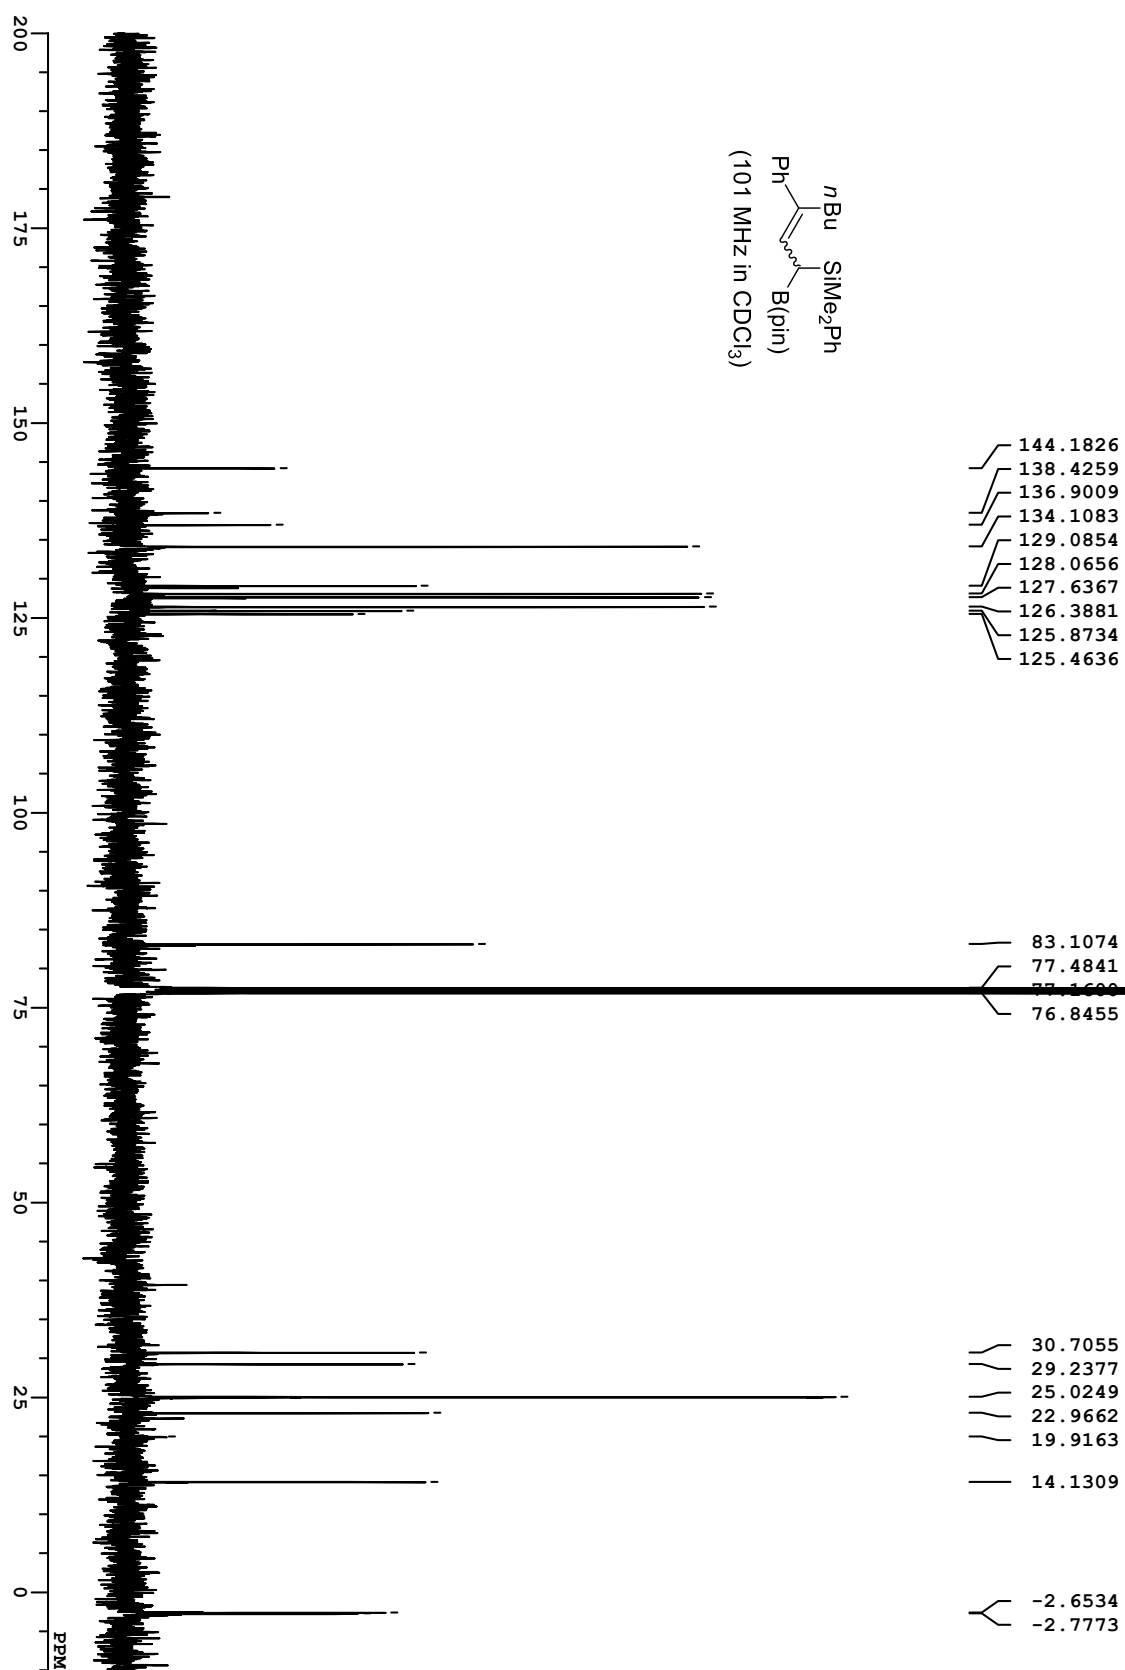

compound (*E*)-3ja

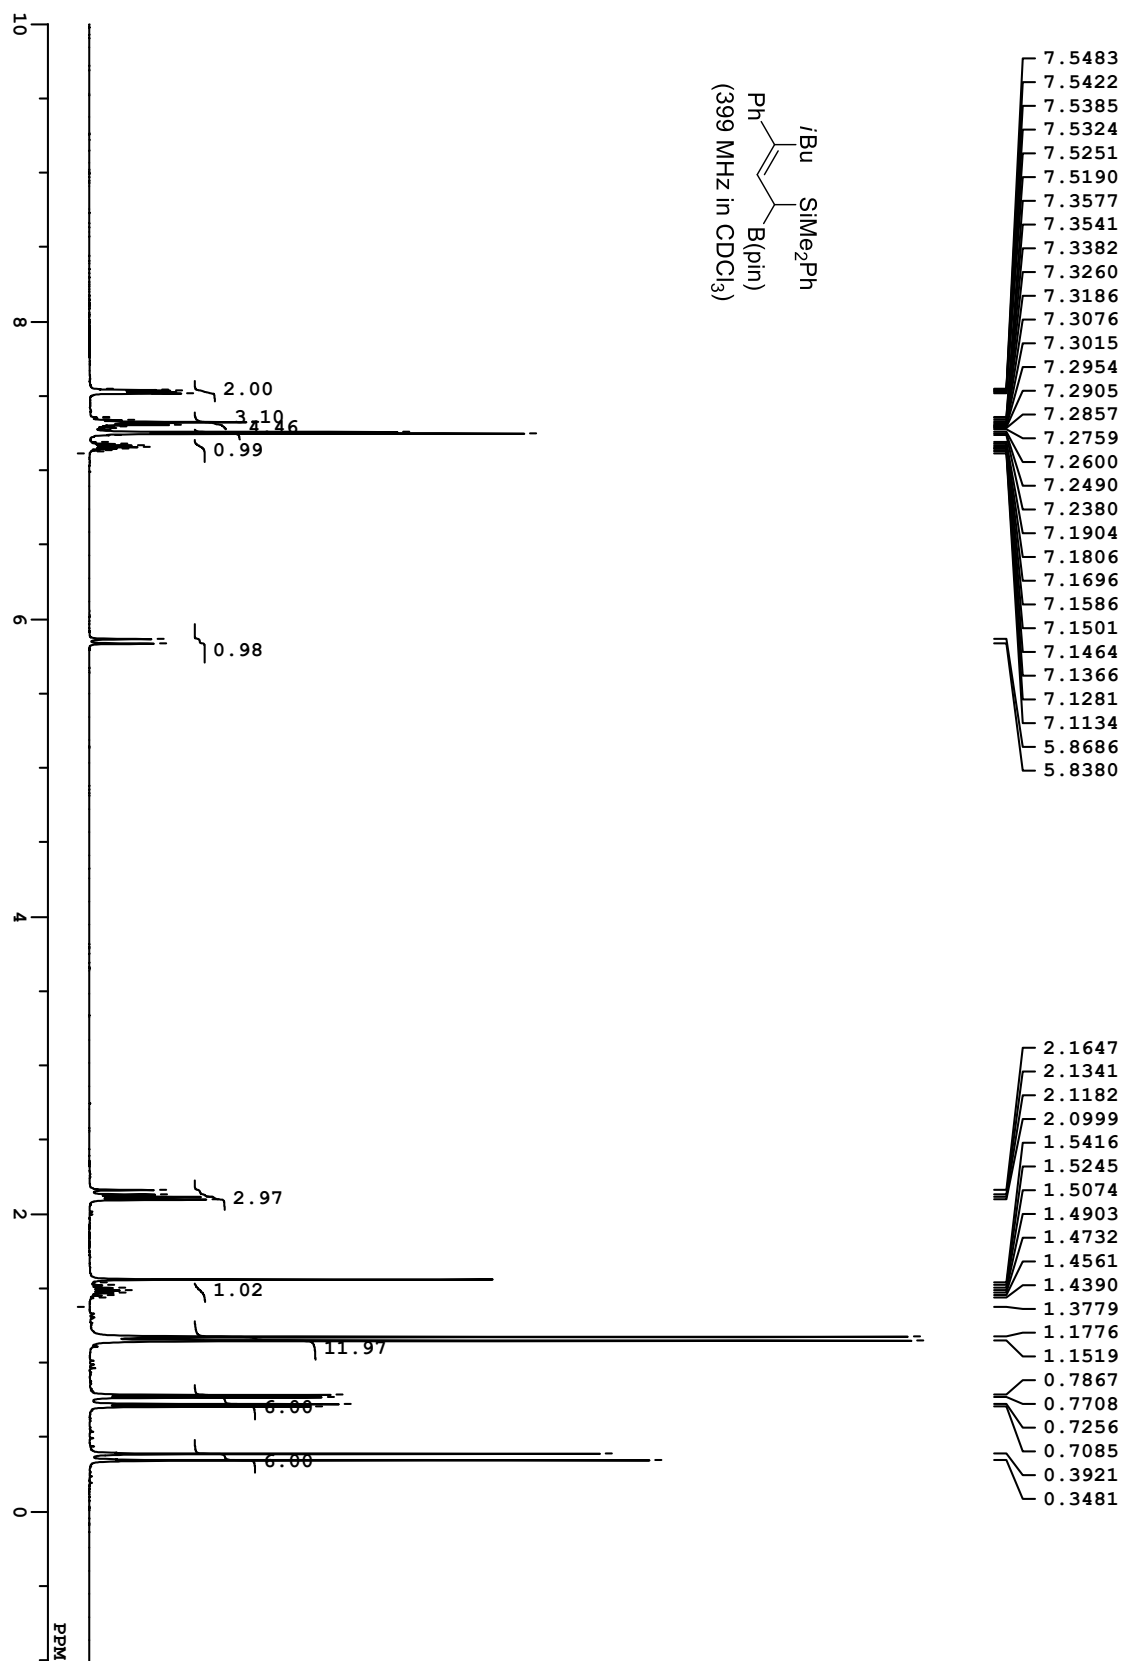

compound (*E*)-3ja

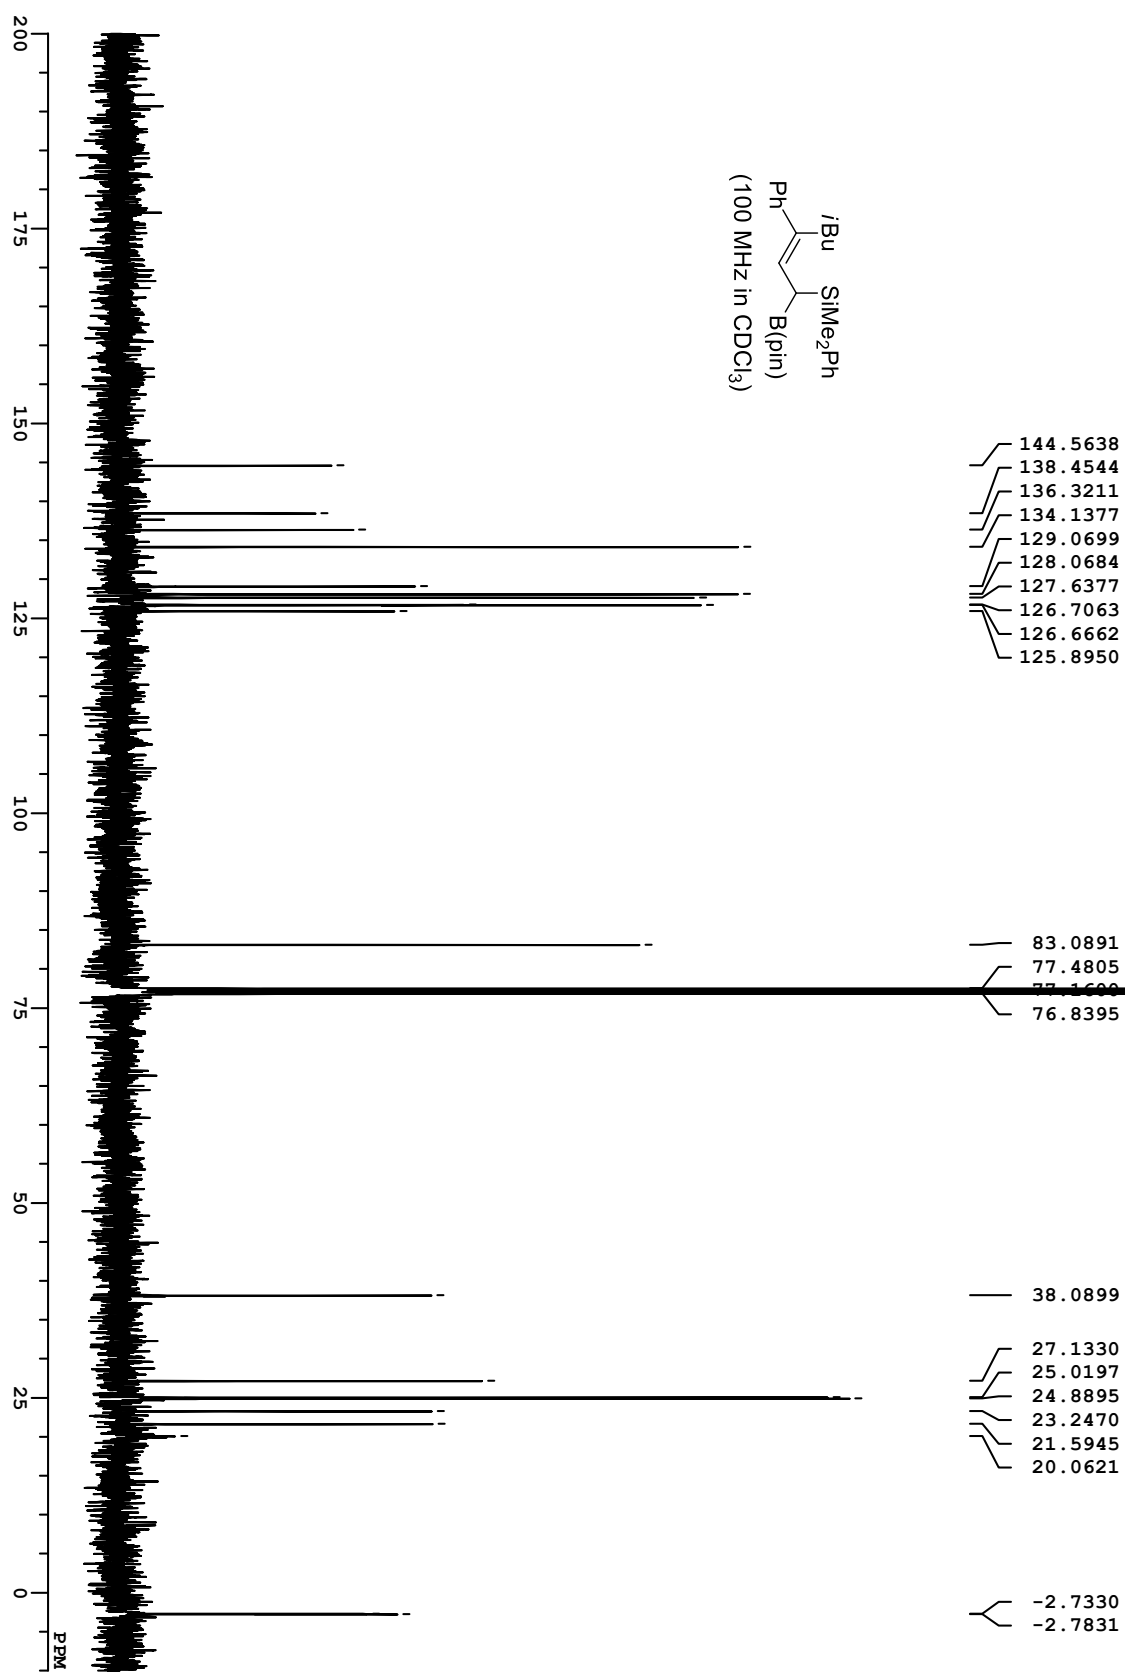

compound **3ka** (dr = 53/47)

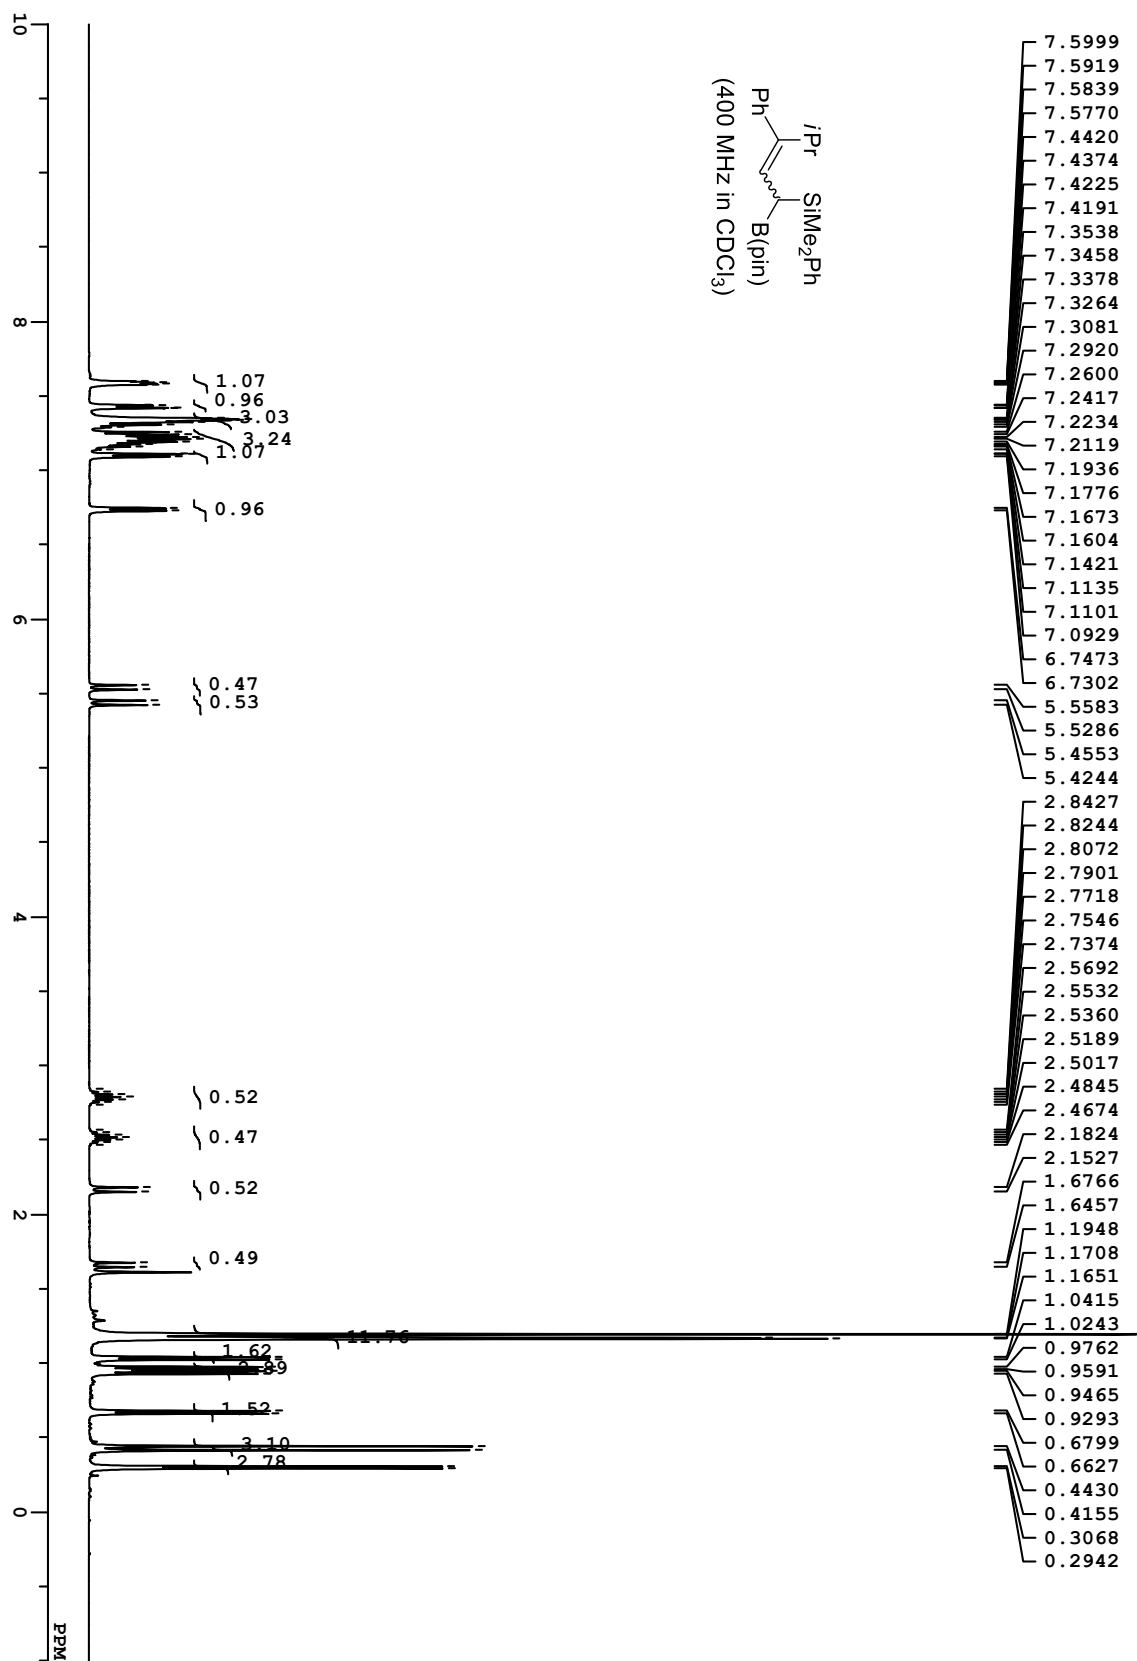

compound **3ka** (dr = 53/47)

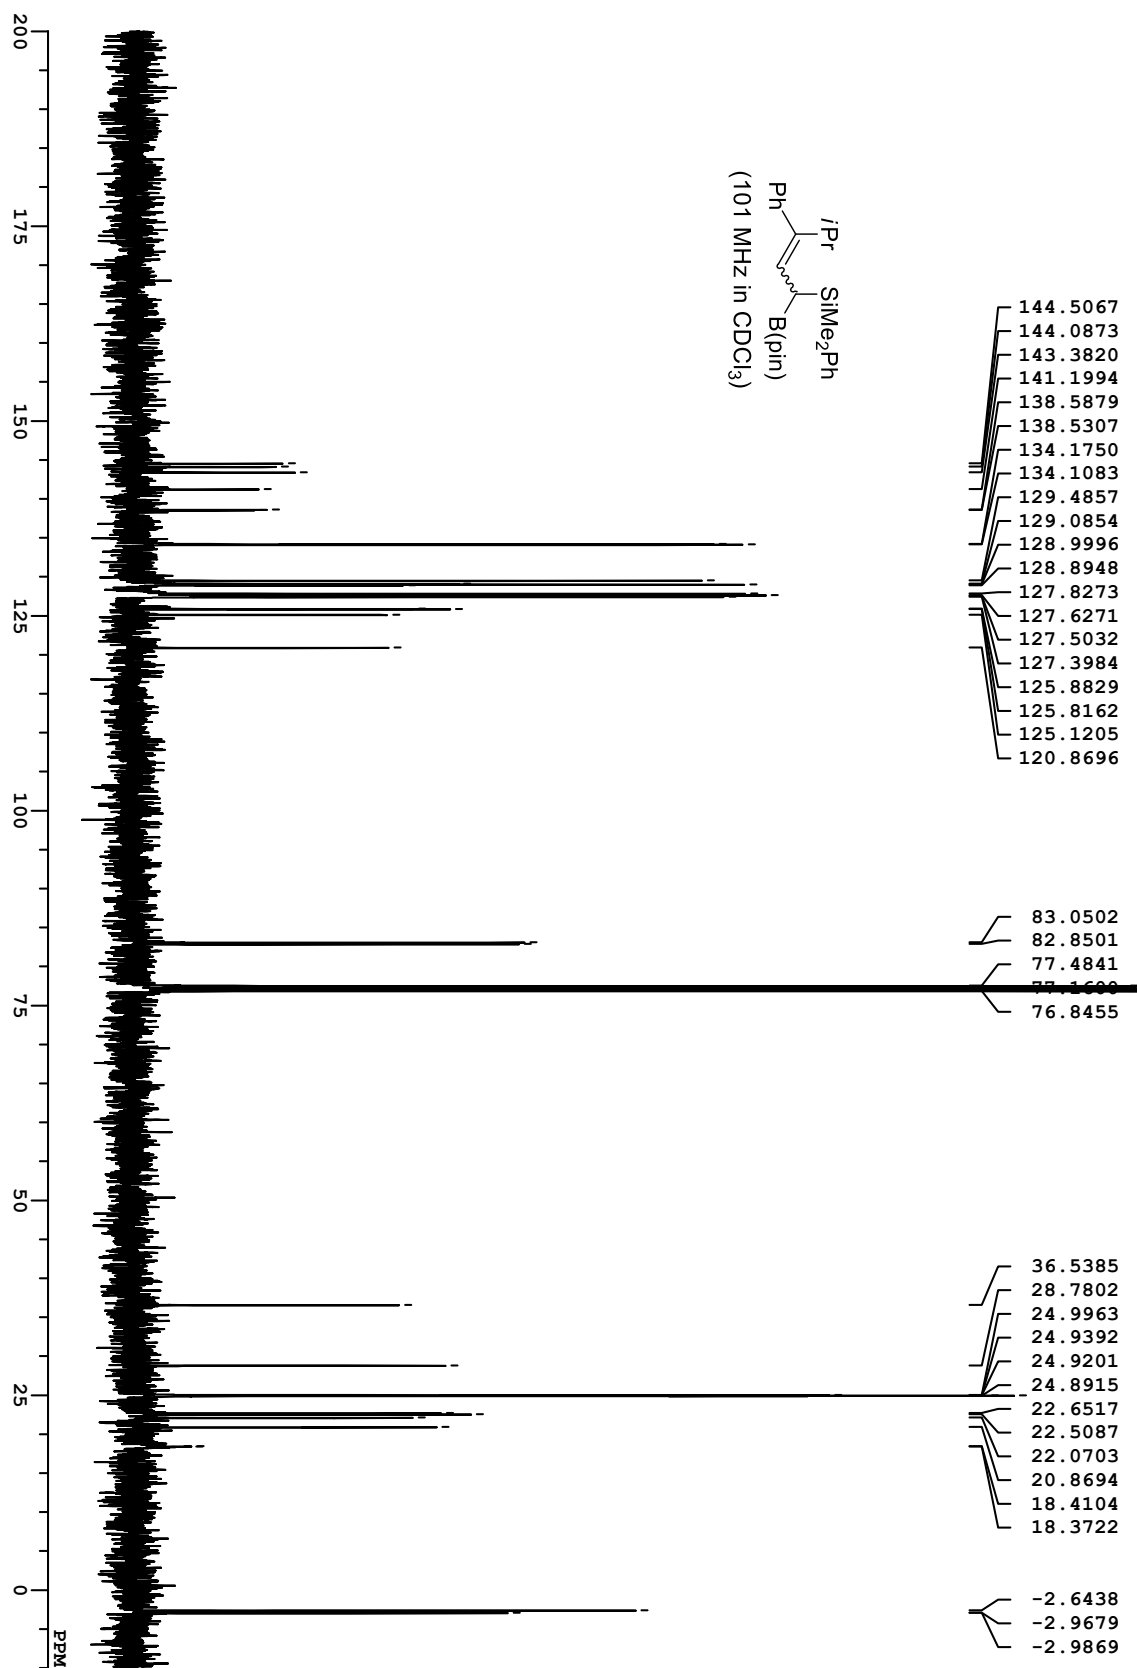

compound **3ab**

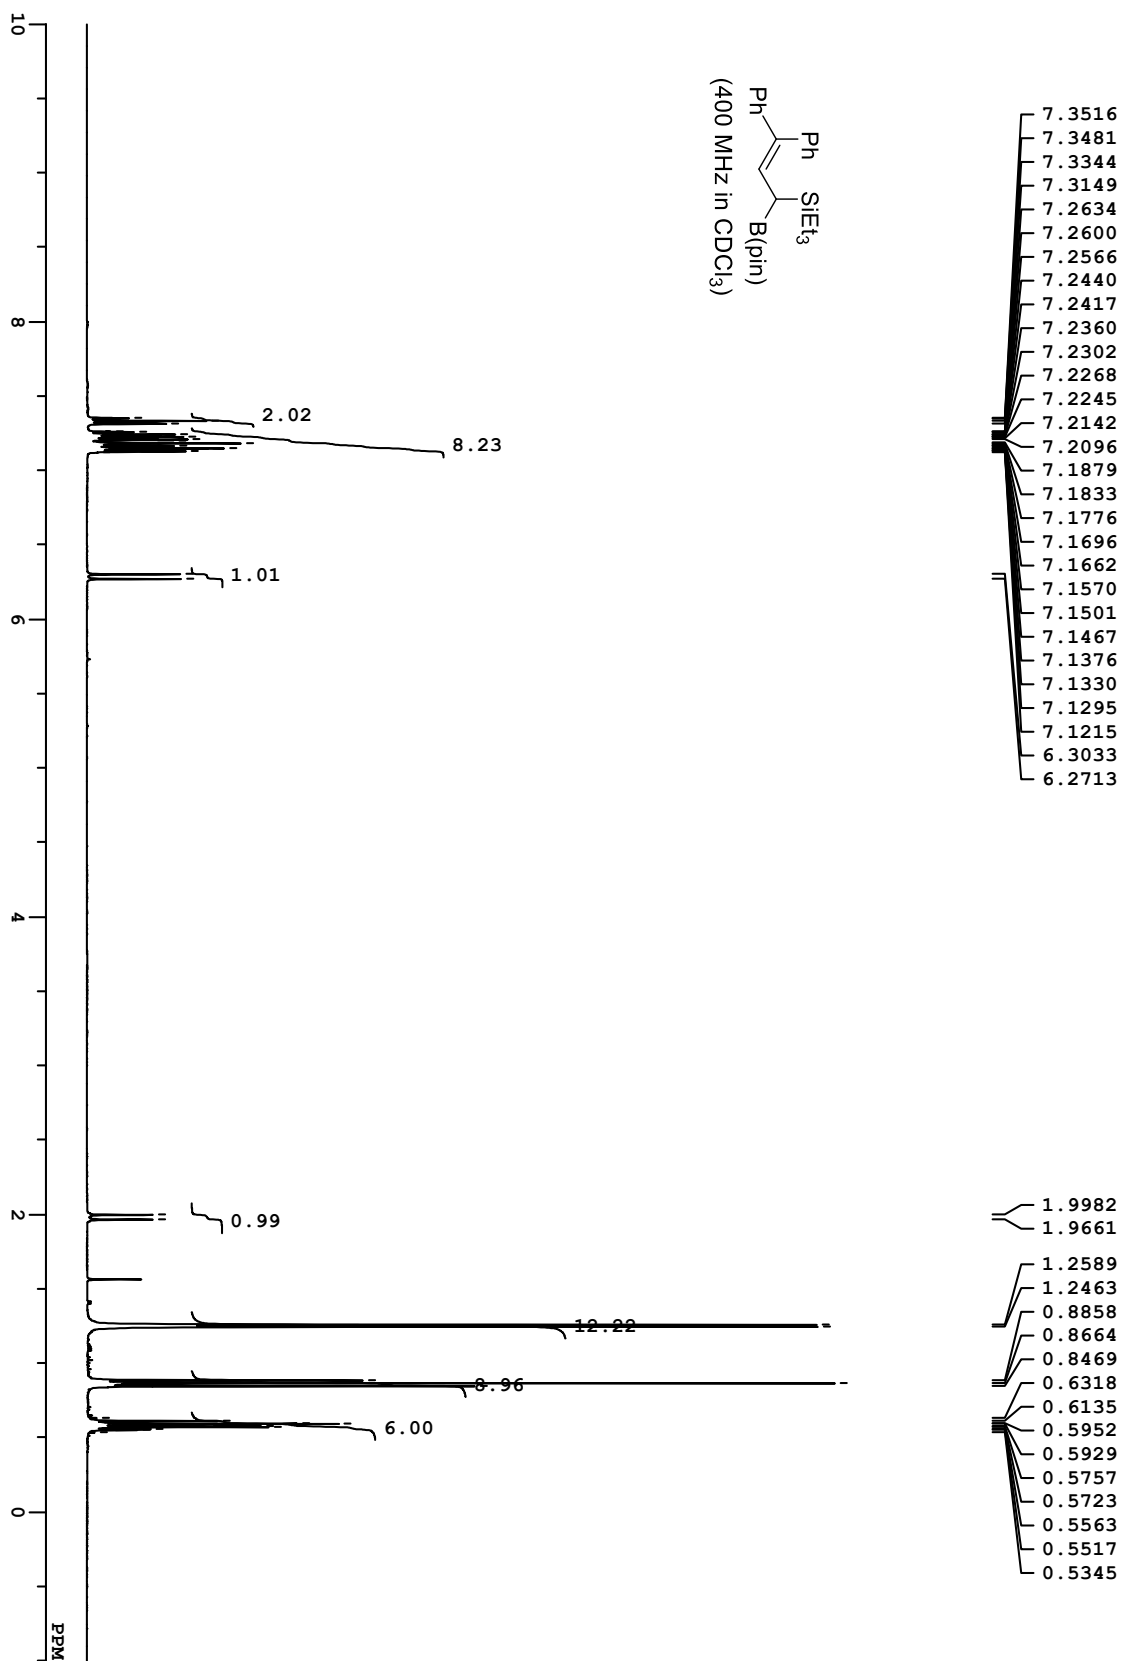

compound 3ab

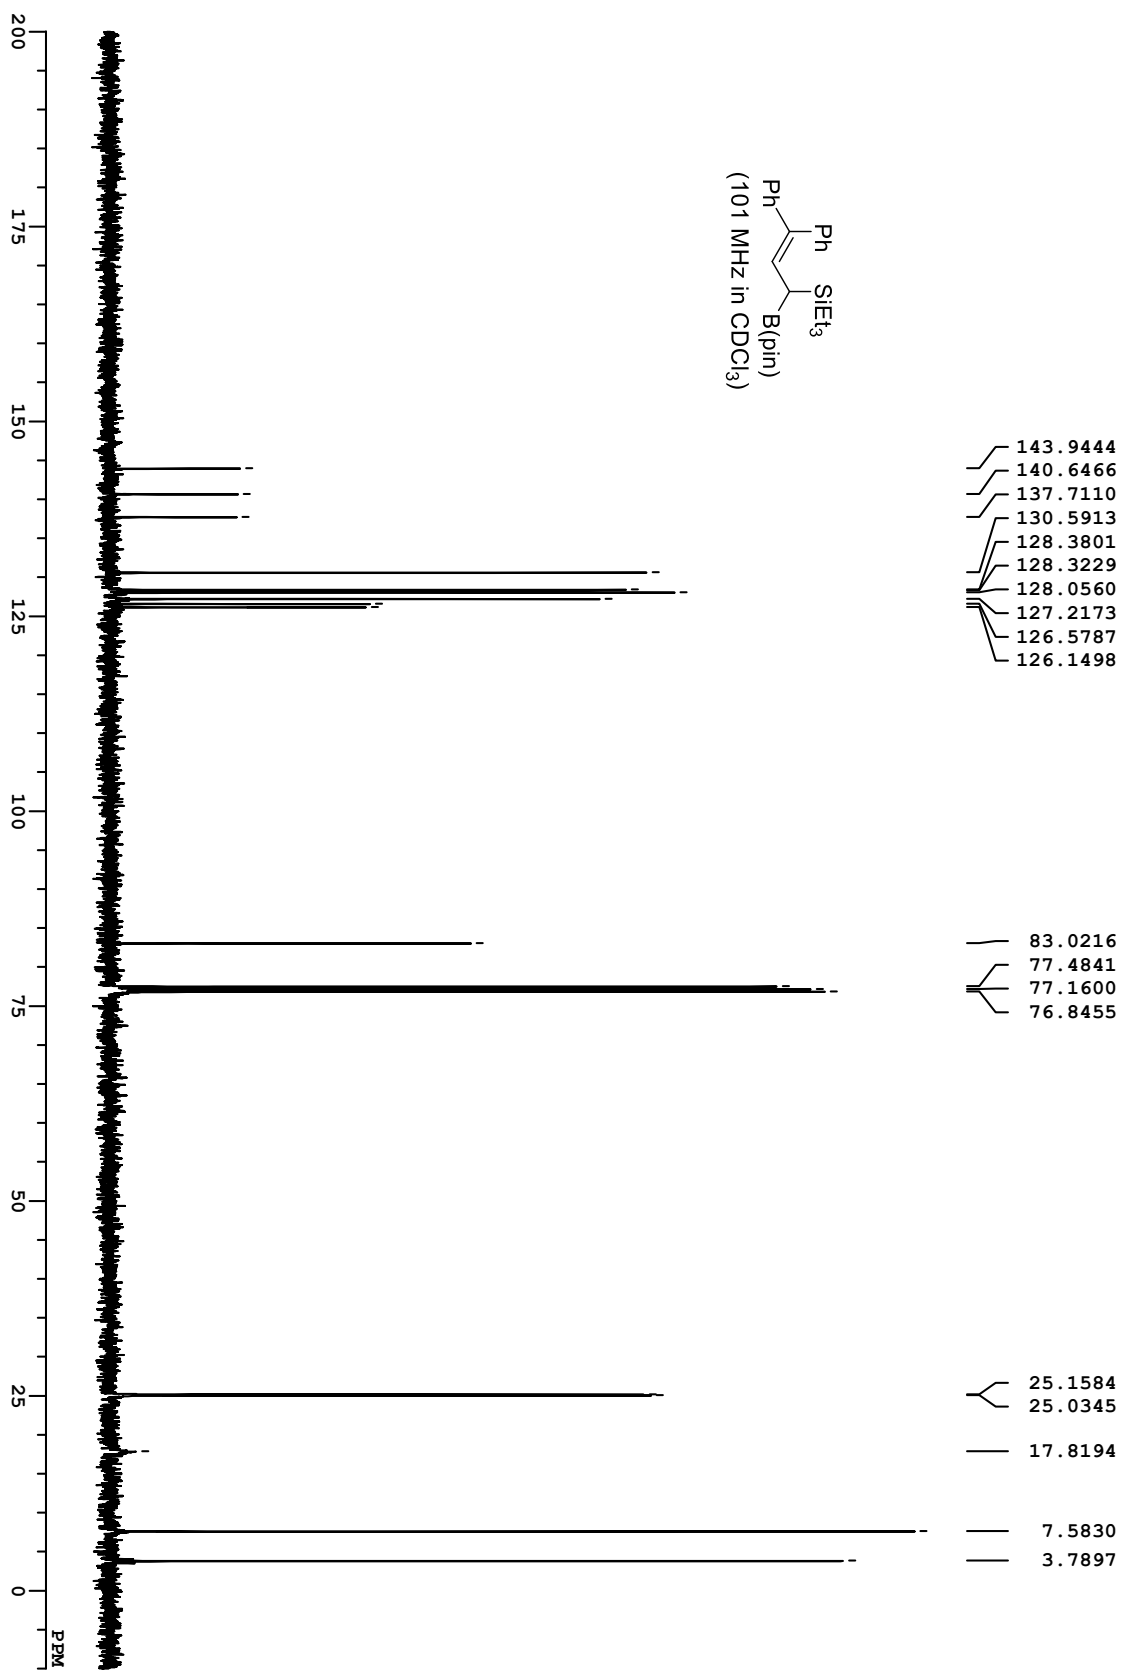



compound **3ac**

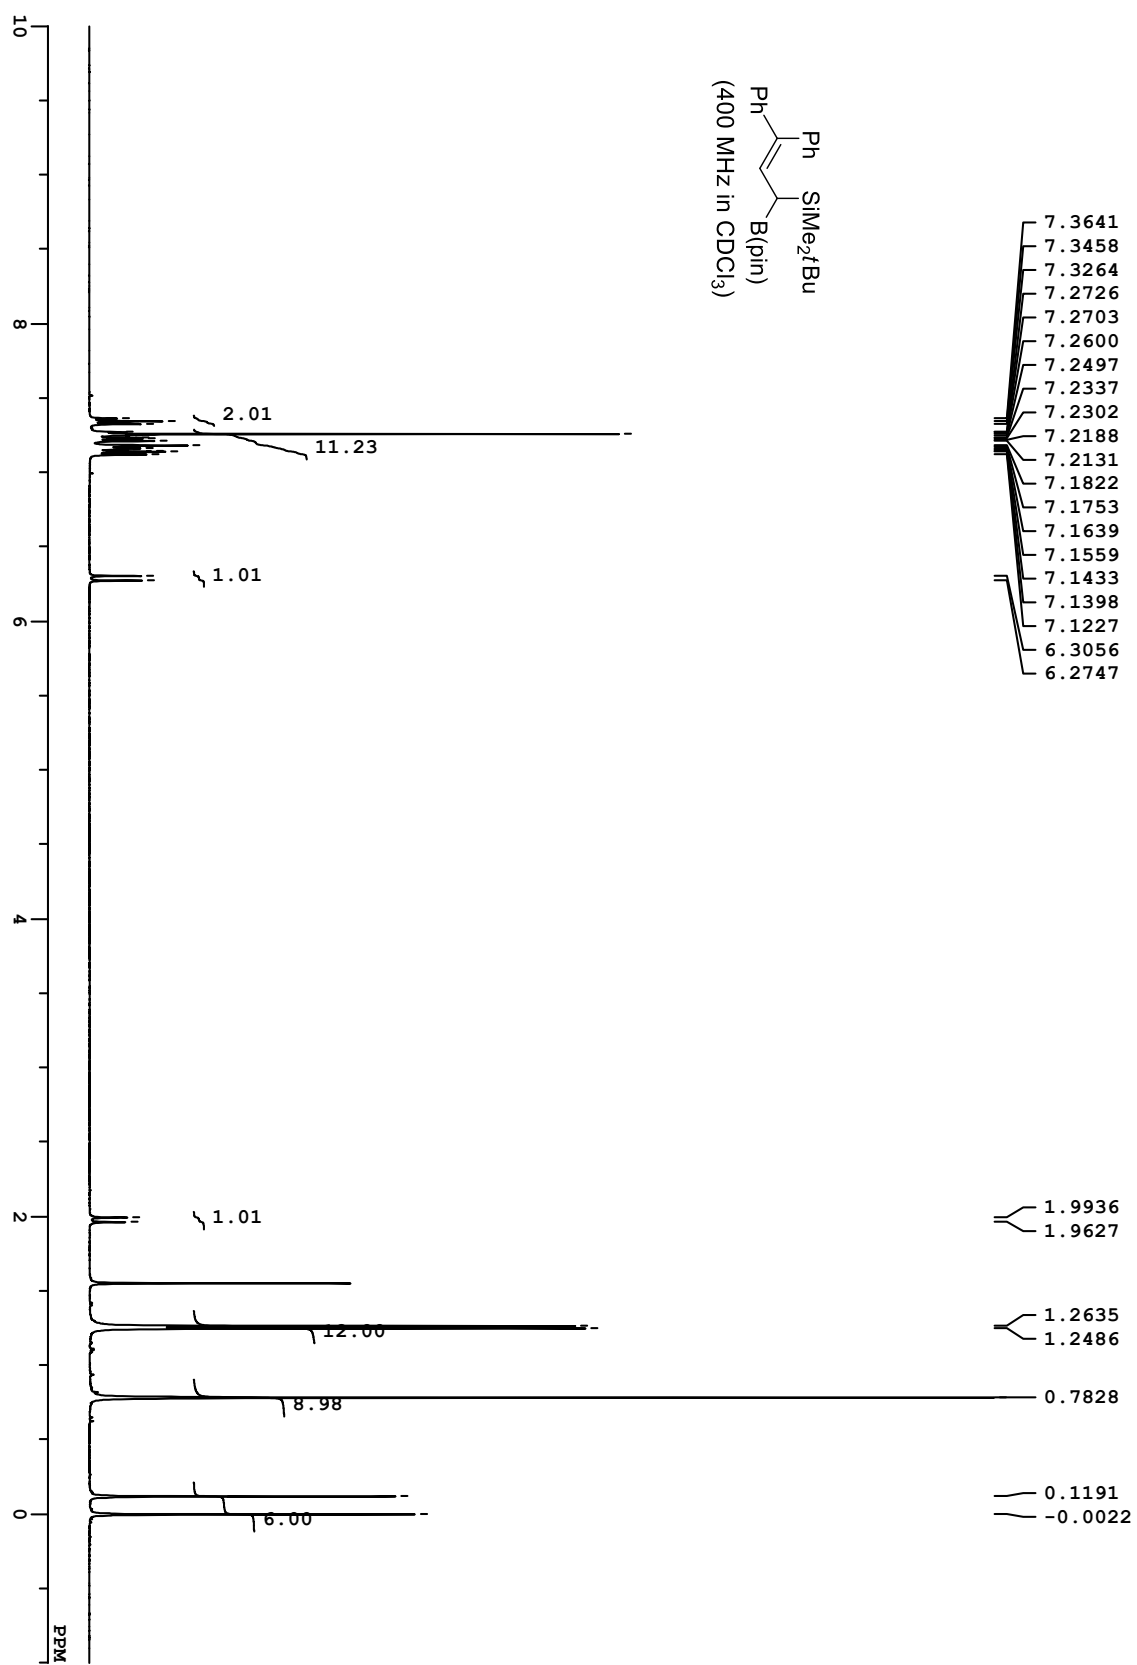

compound 3ac

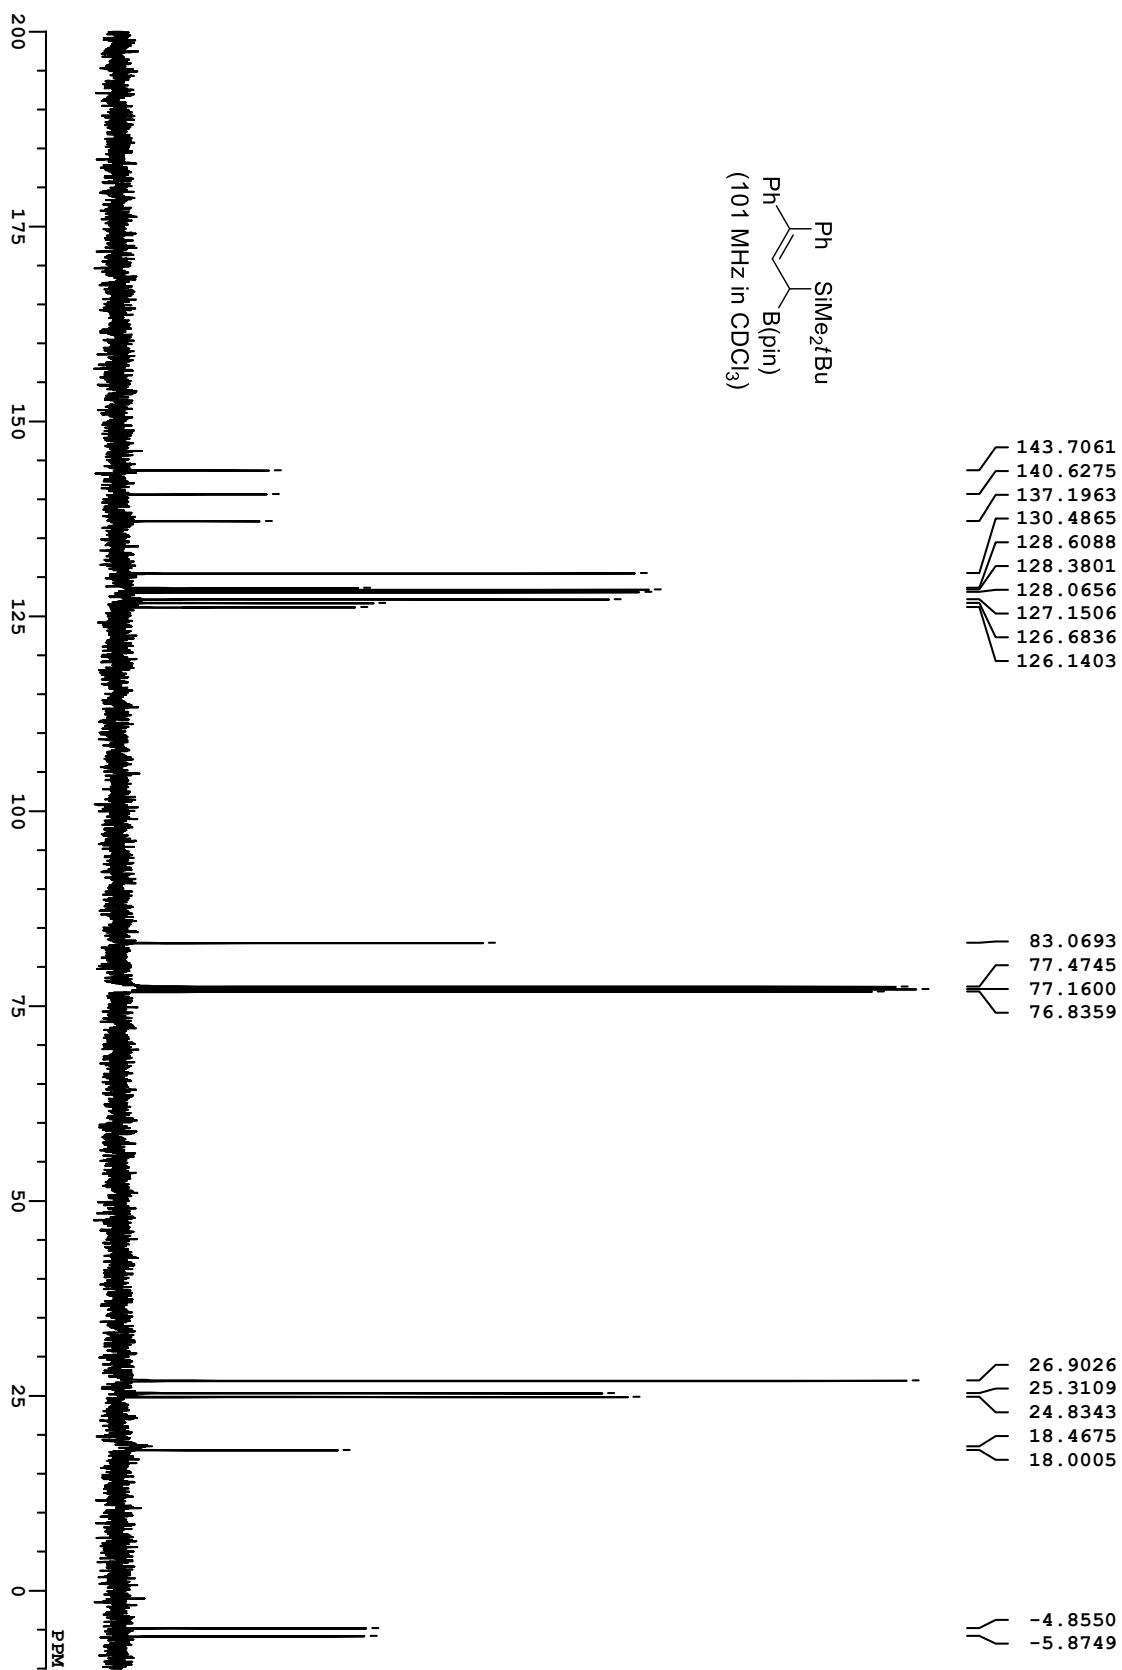

compound **5la**

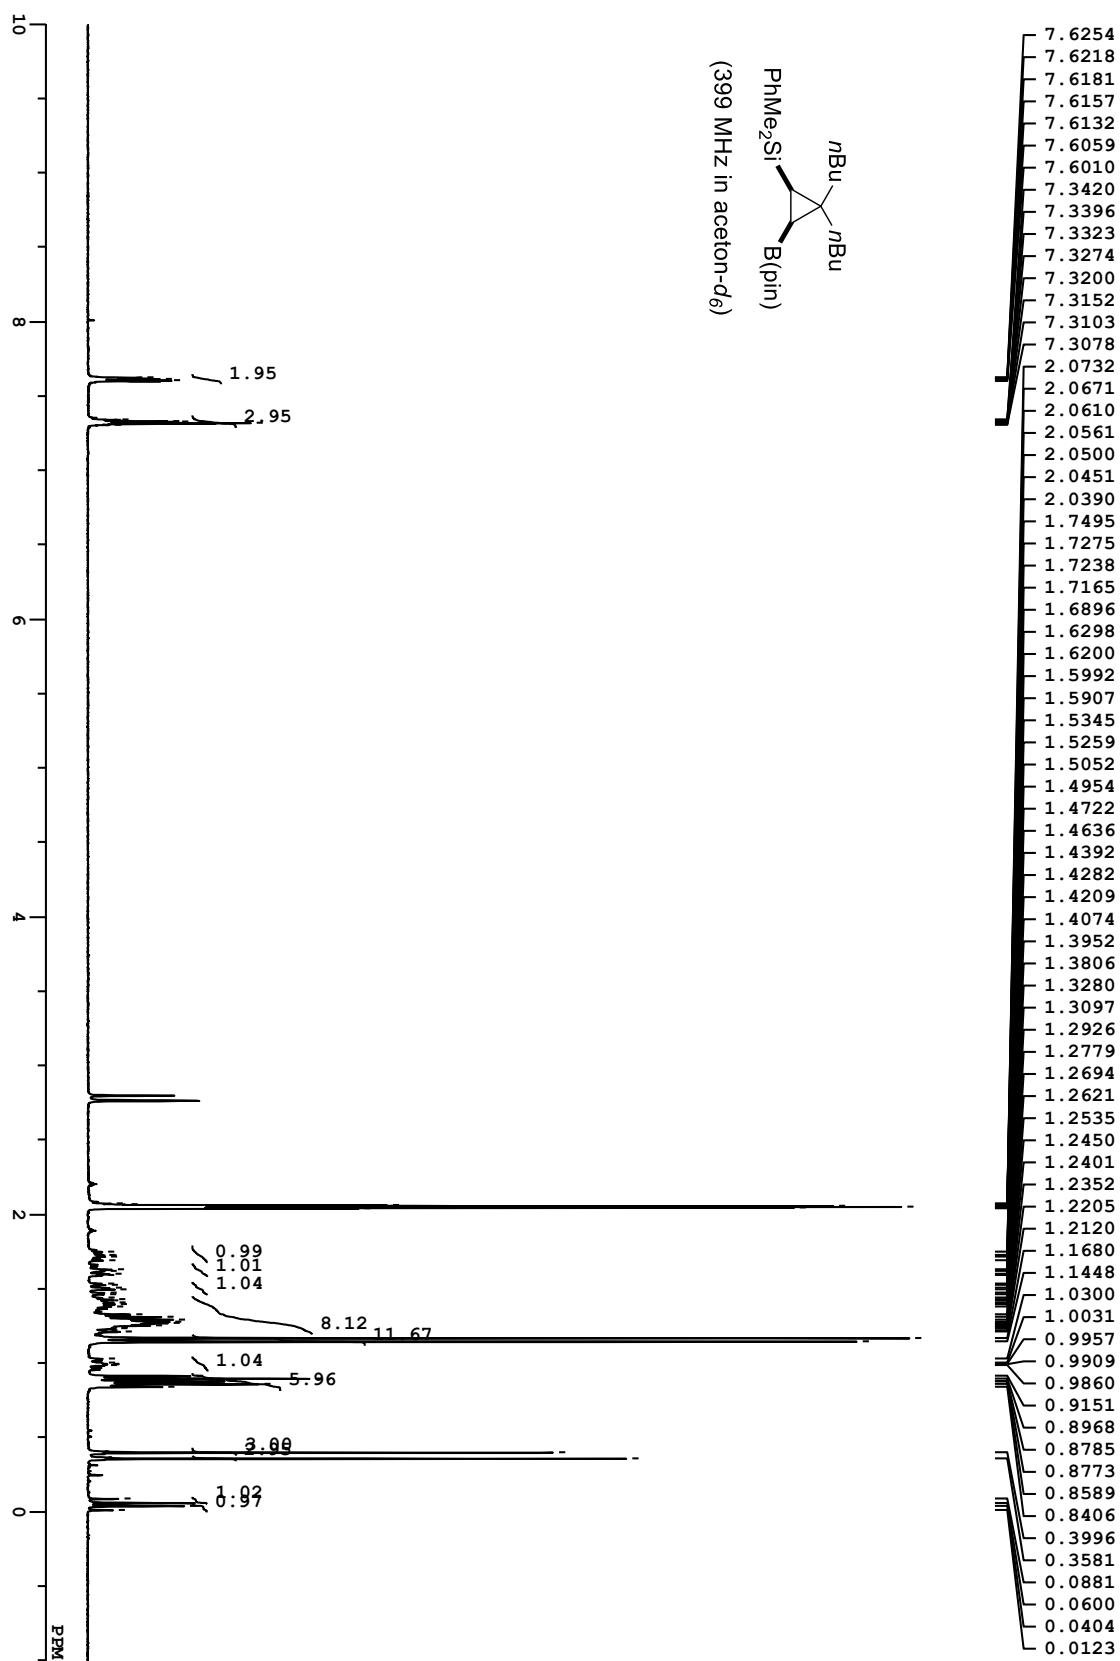

compound 5la

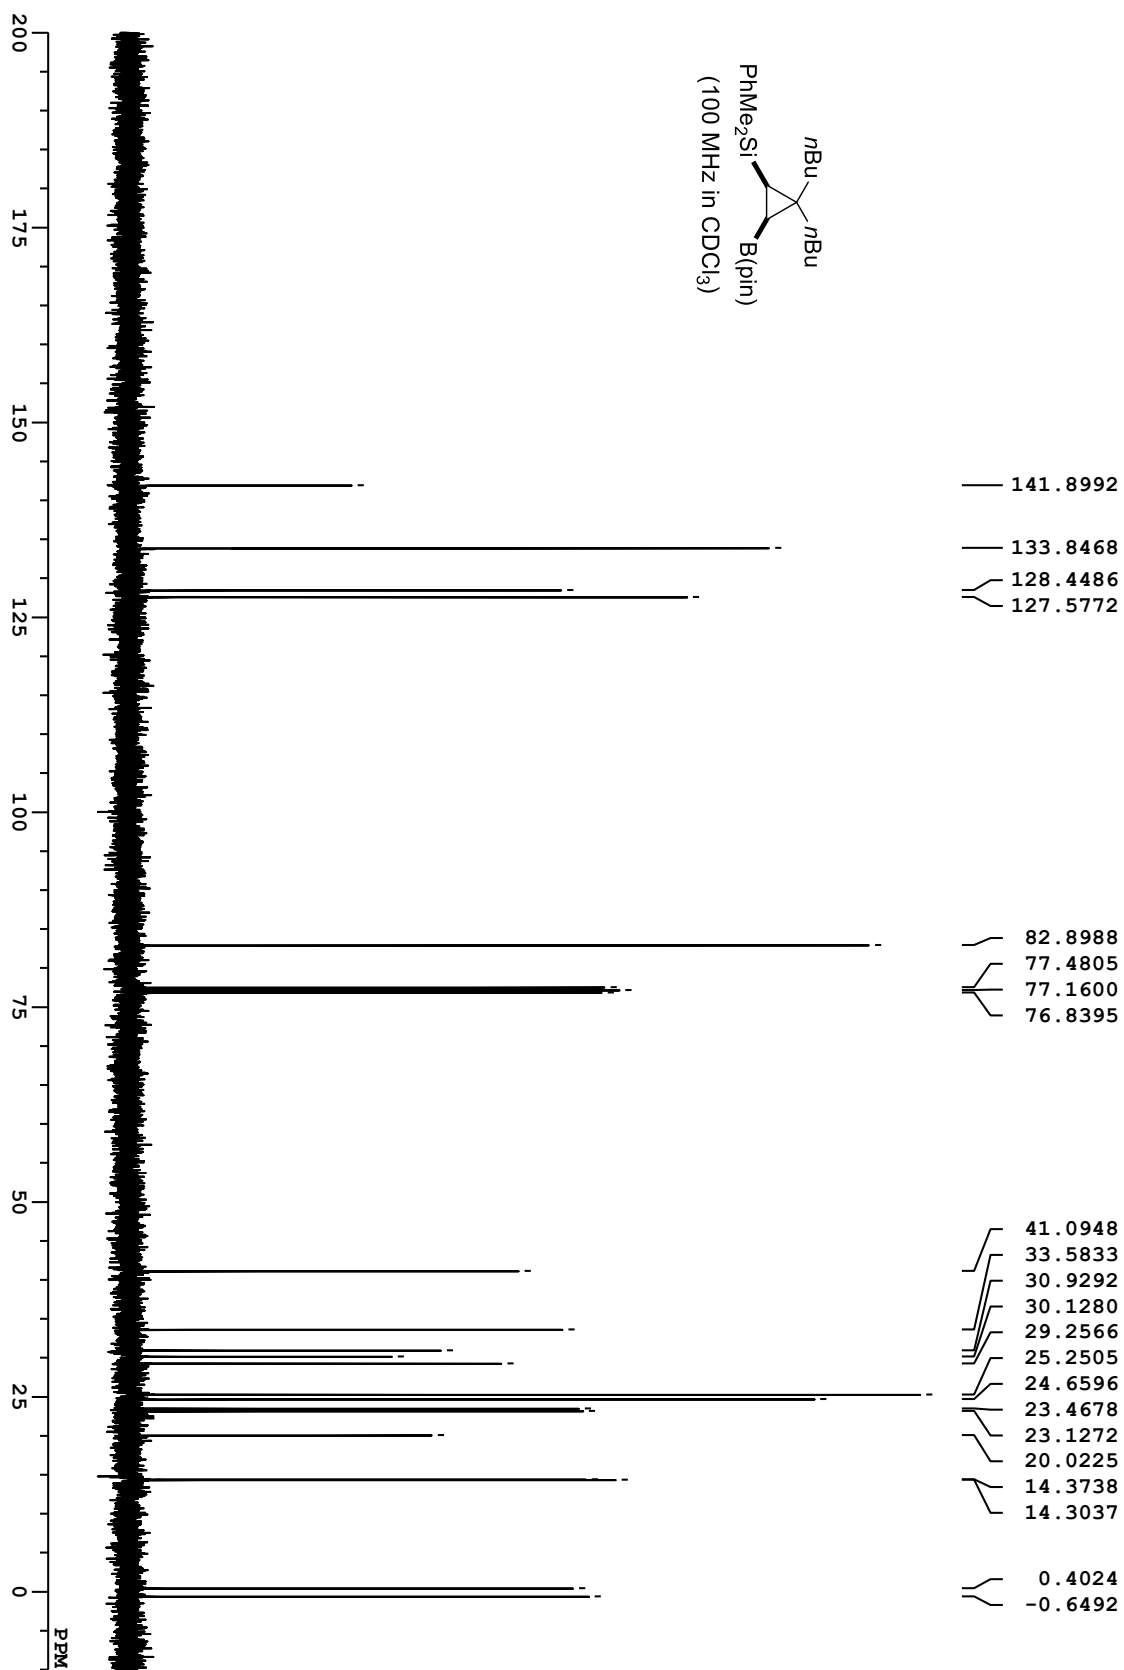

compound 6

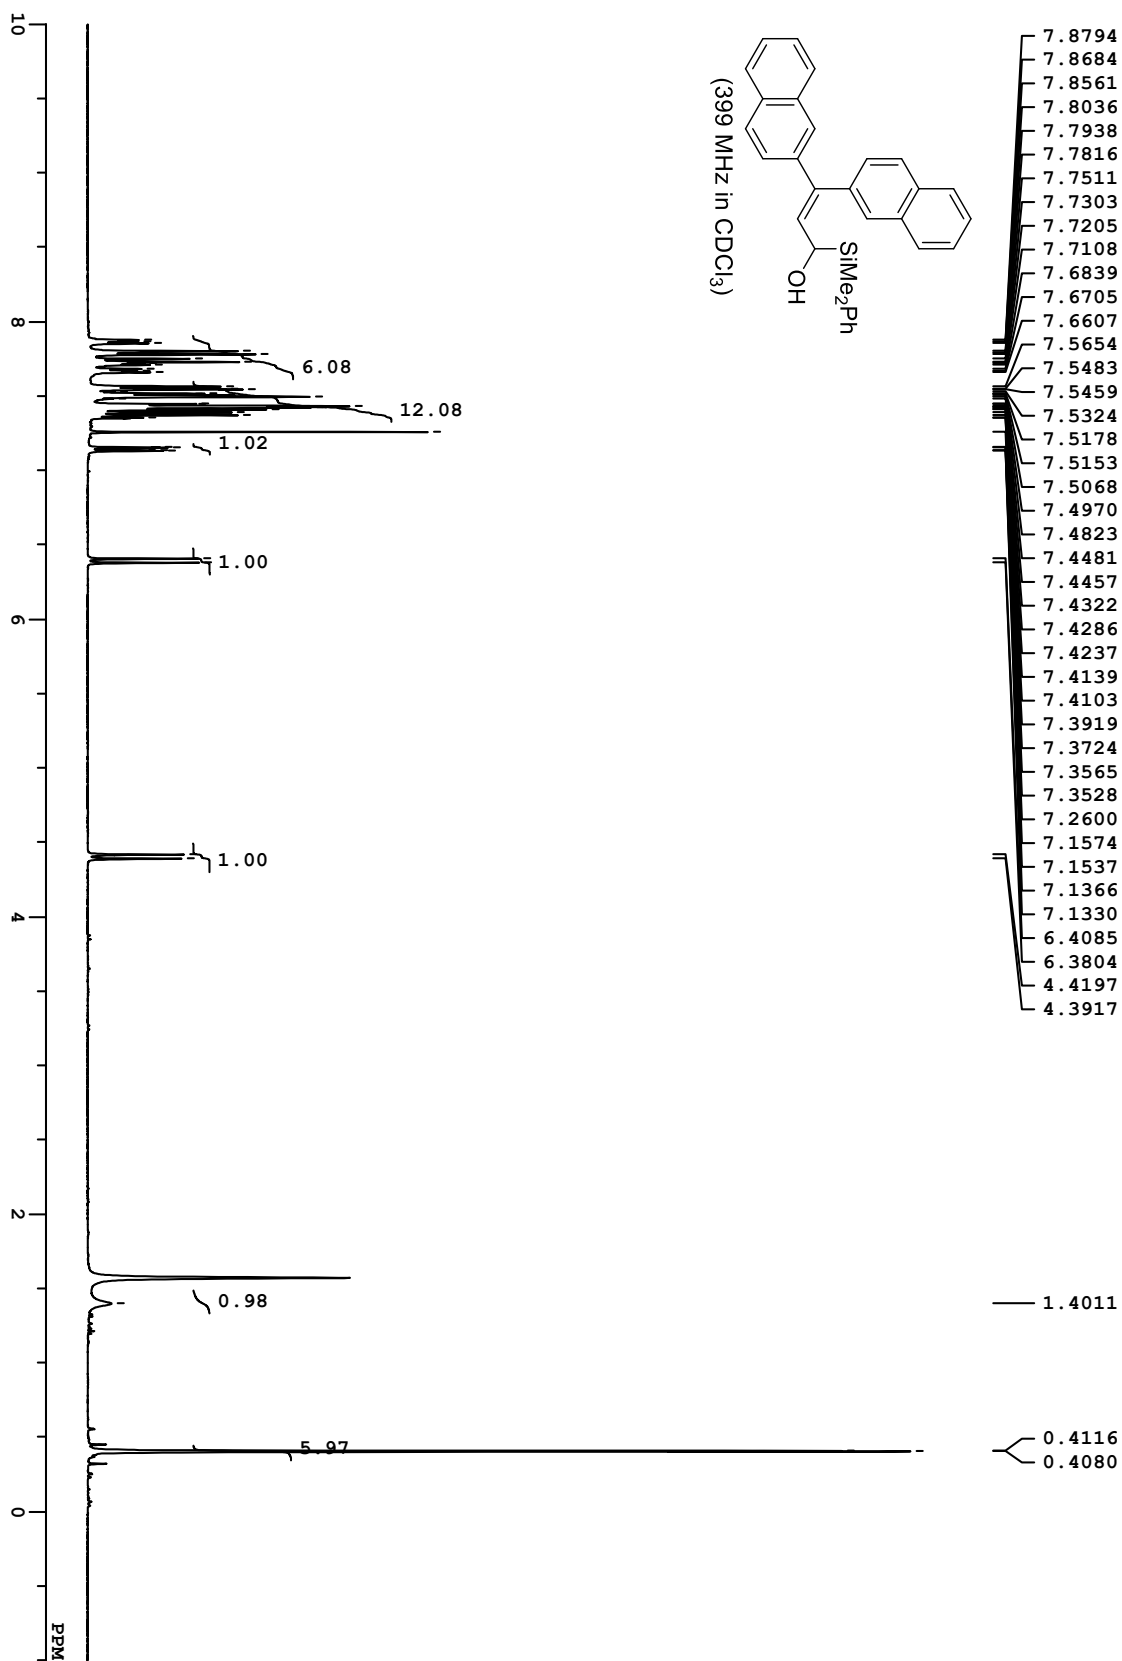

compound 6

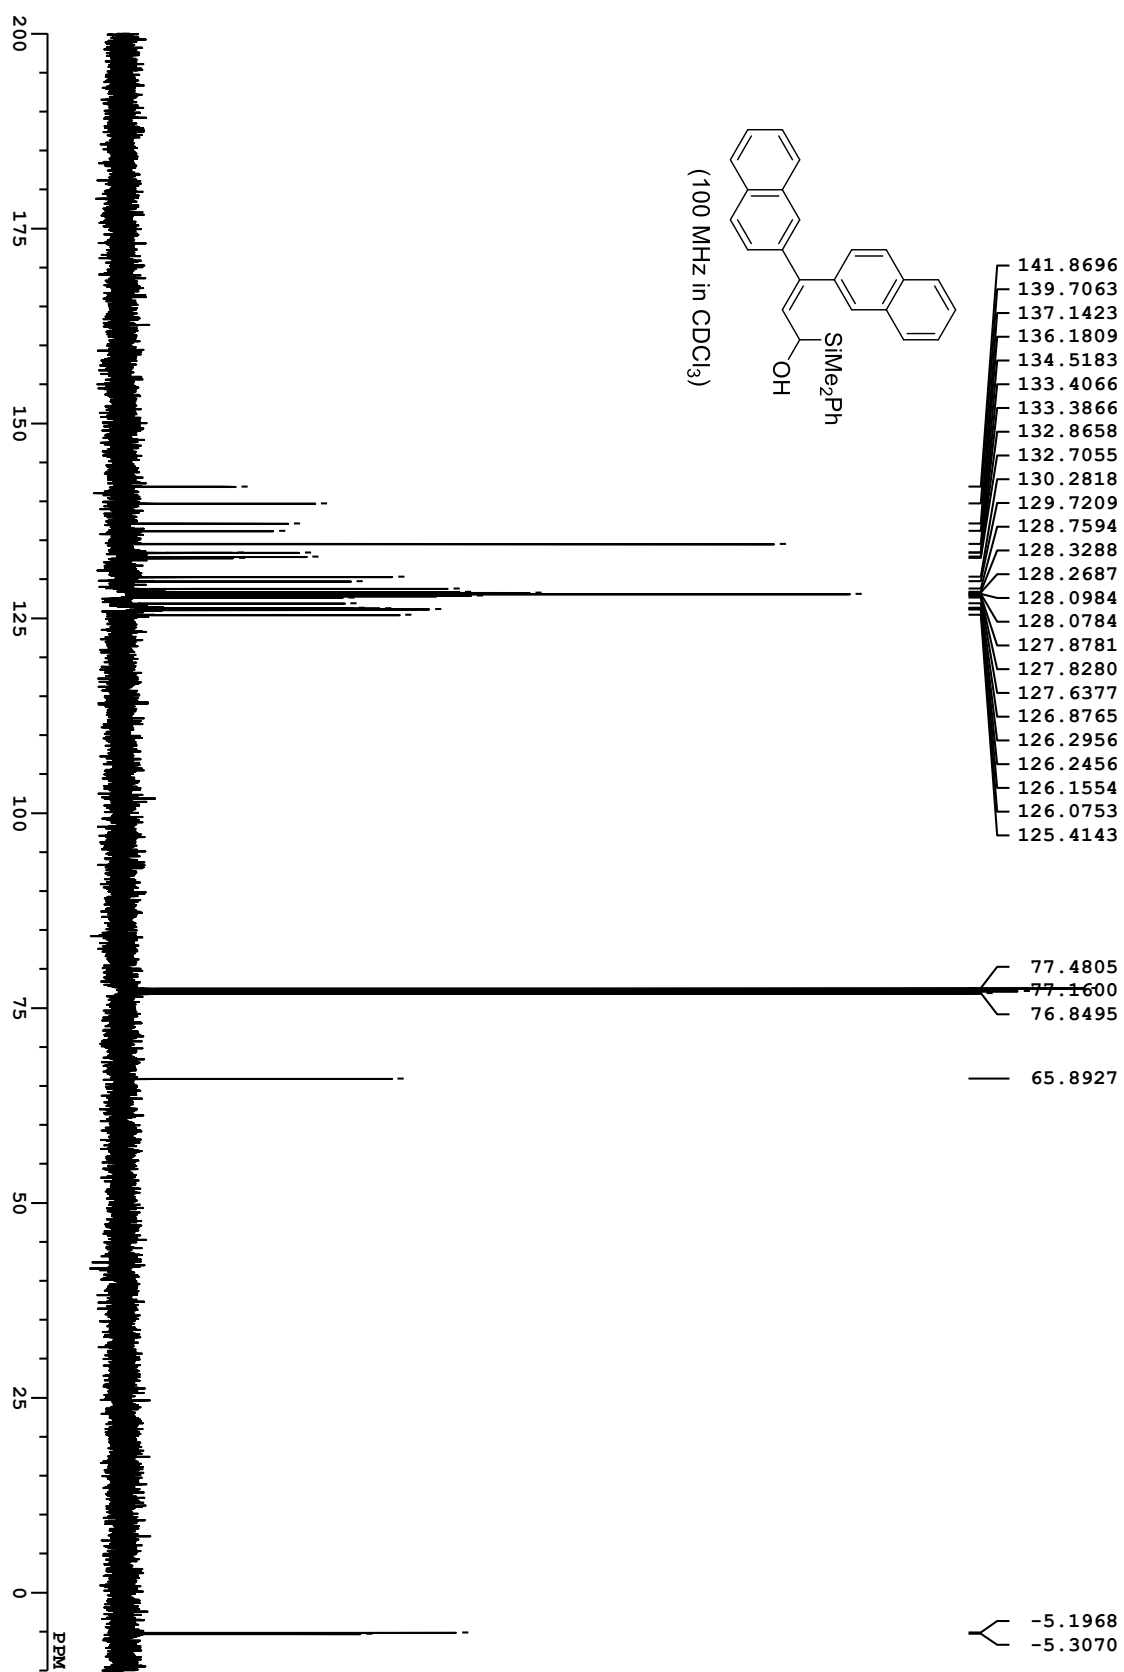

compound 7

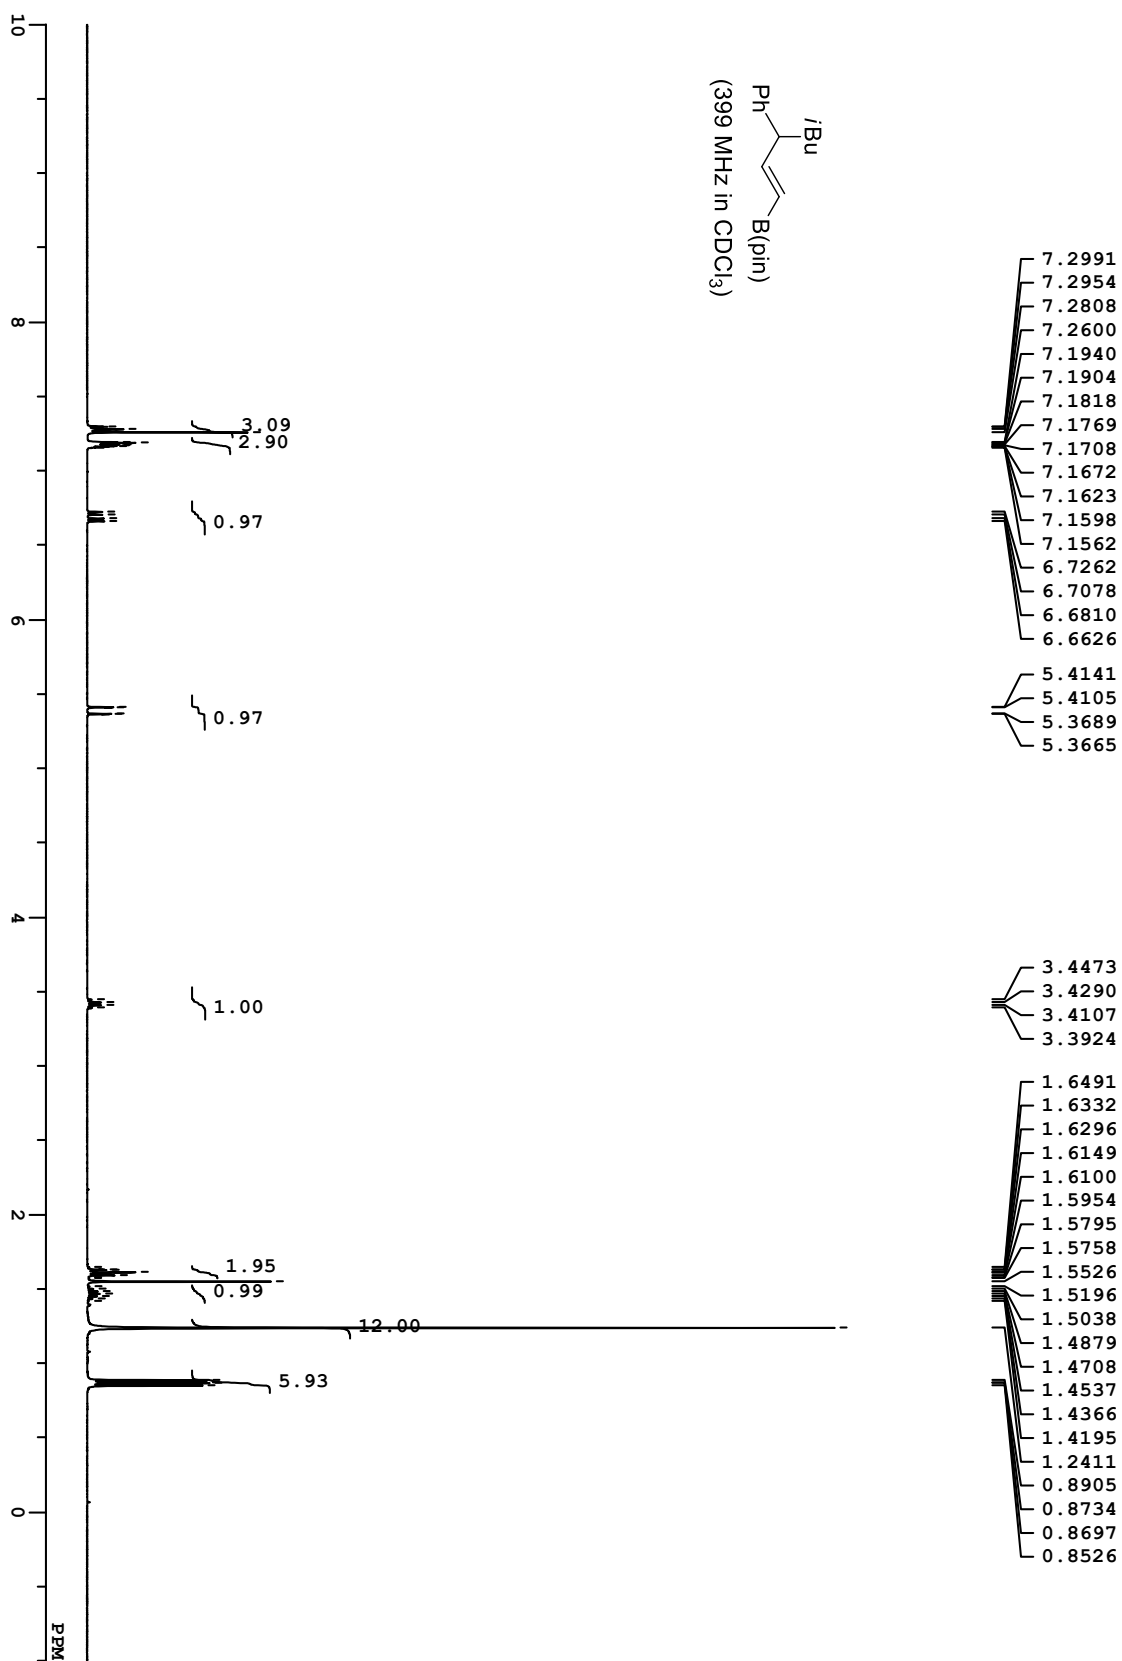

compound 7

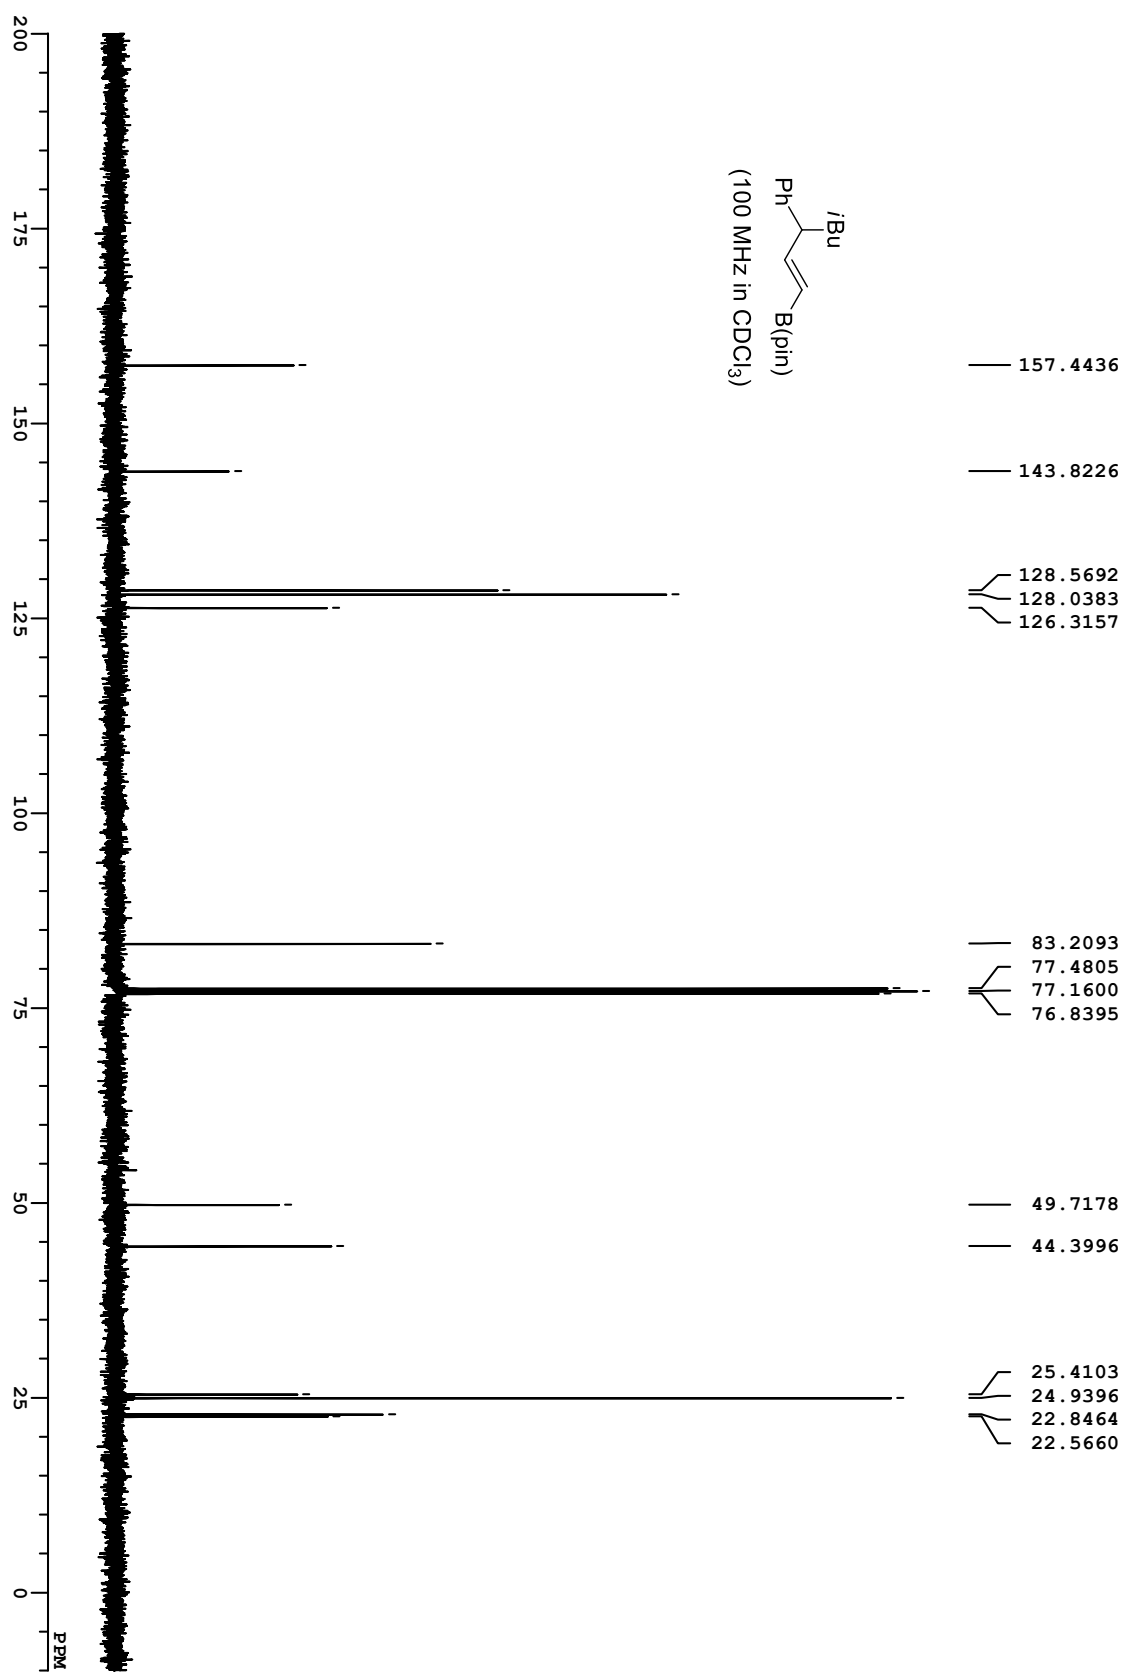



## VII. References

1. Shintani, R.; Iino, R.; Nozaki, K. *J. Am. Chem. Soc.* **2014**, *136*, 7849.
2. Li, H.; Zhang, M.; Mehfooz, H.; Zhu, D.; Zhao, J.; Zhang, Q. *Org. Chem. Front.* **2019**, *6*, 3387.
3. Guo, P.; Sun, W.; Liu, Y.; Li, Y.-X.; Loh, T.-P.; Jiang, Y. *Org. Lett.* **2020**, *22*, 5978.
4. Chen, J.; Guo, P.; Zhang, J.; Rong, J.; Sun, W.; Jiang, Y.; Loh, T.-P. *Angew. Chem., Int. Ed.* **2019**, *58*, 12674.
5. Shishido, R.; Uesugi, M.; Takahashi, R.; Mita, T.; Ishiyama, T.; Kubota, K.; Ito, H. *J. Am. Chem. Soc.* **2020**, *142*, 14125.
6. Mankad, N. P.; Laitar, D. S.; Sadighi, J. P. *Organometallics* **2004**, *23*, 3369.
7. Gaussian 16, Revision C.02, Frisch, M. J.; Trucks, G. W.; Schlegel, H. B.; Scuseria, G. E.; Robb, M. A.; Cheeseman, J. R.; Scalmani, G.; Barone, V.; Petersson, G. A.; Nakatsuji, H.; Li, X.; Caricato, M.; Marenich, A. V.; Bloino, J.; Janesko, B. G.; Gomperts, R.; Mennucci, B.; Hratchian, H. P.; Ortiz, J. V.; Izmaylov, A. F.; Sonnenberg, J. L.; Williams-Young, D.; Ding, F.; Lipparini, F.; Egidi, F.; Goings, J.; Peng, B.; Petrone, A.; Henderson, T.; Ranasinghe, D.; Zakrzewski, V. G.; Gao, J.; Rega, N.; Zheng, G.; Liang, W.; Hada, M.; Ehara, M.; Toyota, K.; Fukuda, R.; Hasegawa, J.; Ishida, M.; Nakajima, T.; Honda, Y.; Kitao, O.; Nakai, H.; Vreven, T.; Throssell, K.; Montgomery, Jr., J. A.; Peralta, J. E.; Ogliaro, F.; Bearpark, M. J.; Heyd, J. J.; Brothers, E. N.; Kudin, K. N.; Staroverov, V. N.; Keith, T. A.; Kobayashi, R.; Normand, J.; Raghavachari, K.; Rendell, A. P.; Burant, J. C.; Iyengar, S. S.; Tomasi, J.; Cossi, M.; Millam, J. M.; Klene, M.; Adamo, C.; Cammi, R.; Ochterski, J. W.; Martin, R. L.; Morokuma, K.; Farkas, O.; Foresman, J. B.; Fox, D. J. Gaussian, Inc., Wallingford CT, 2019.
8. Zhao, Y.; Truhlar, D. G. *Theor. Chem. Acc.* **2008**, *120*, 215.
9. Marenich, A. V.; Cramer, C. J.; Truhlar, D. G. *J. Phys. Chem. B* **2009**, *113*, 6378.
10. Glendenning, E. D.; Reed, A. E.; Carpenter, J. E.; Weinhold, F. NBO Version 3.1.
11. Bogdos, M. K.; Morandi, B. *J. Chem. Educ.* **2023**, *100*, 3641.
12. CYLview20; Legault, C. Y., Université de Sherbrooke, 2020 (<http://www.cylview.org>).
